# Supplementary material for: In silico Prioritization of Transporter–Drug Relationships From Drug Sensitivity Screens
Source: PubMed Central journal article supplement (PMC6137680; doi:10.3389/fphar.2018.01011), 2018-09-07

Supplemental Figure 1. PubMed search of drug gene associations.

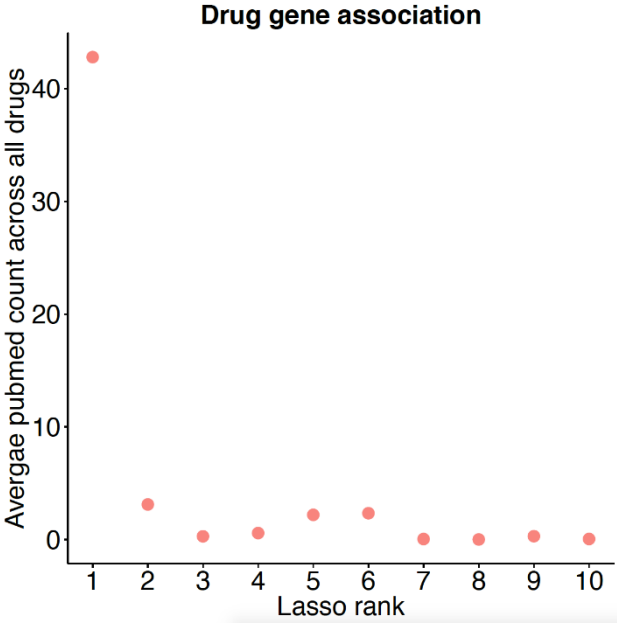

Supplement: Image_1.pdf [file Image_1.pdf]
