# Supplementary material for: In silico Prioritization of Transporter–Drug Relationships From Drug Sensitivity Screens
Source: Front Pharmacol. 2018 Sep 7;9:1011. doi: 10.3389/fphar.2018.01011 (PMC6137680; doi:10.3389/fphar.2018.01011)
Supplement: TABLE S2 — Transporter expression landscape in cancer cell lines. [file Table_2.XLSX]

## Sheet: Cell Lines - #Transporters
Cell Line	Cosmic ID	Tissue	#Transporters expressed	#SLCs	#ABCs
LoVo	907790	digestive system	255	227	28
MIA-PaCa-2	724870	pancreas	250	226	24
Daudi	906831	blood	243	218	25
HuH-7	907071	digestive system	242	214	28
KASUMI-1	907275	blood	239	216	23
HCC2218	749716	breast	238	215	23
MOLM-13	1330947	blood	235	212	23
SW1463	909748	digestive system	235	211	24
TC-YIK	946357	urogenital system	234	209	25
huH-1	1298146	digestive system	229	203	26
T84	909761	digestive system	229	209	20
SNU-C1	910905	digestive system	228	203	25
NCI-H64	688026	lung	226	205	21
NCI-H929	724825	blood	225	205	20
NCI-SNU-16	908446	digestive system	225	203	22
COLO-684	910691	urogenital system	225	202	23
NUGC-4	1298357	digestive system	224	199	25
SW620	905962	digestive system	224	203	21
ECC10	906848	digestive system	224	202	22
VCaP	1299075	urogenital system	222	201	21
VAL	1331048	blood	222	199	23
EB-3	906847	blood	222	197	25
C3A	910850	digestive system	222	196	26
SK-MM-2	753612	blood	221	197	24
UACC-893	909778	breast	221	196	25
NB12	949172	nervous system	221	200	21
SU-DHL-6	1331037	blood	220	201	19
SK-N-SH	717431	nervous system	220	198	22
RCC10RGB	909974	kidney	220	200	20
PANC-10-05	925348	pancreas	220	200	20
LB2241-RCC	753578	kidney	219	197	22
SIMA	753620	nervous system	219	199	20
JAR	907175	urogenital system	219	198	21
NCI-H524	908483	lung	219	201	18
Raji	909262	blood	219	197	22
EFO-21	911905	urogenital system	219	195	24
CAL-148	924106	breast	219	198	21
MKN45	925340	digestive system	219	200	19
NCI-H1688	1298349	lung	218	197	21
HEL	907053	blood	218	197	21
P30-OHK	909252	blood	218	200	18
UMC-11	909779	lung	218	196	22
EPLC-272H	753556	lung	217	194	23
H-EMC-SS	907290	bone	217	197	20
FU97	1290806	digestive system	216	193	23
HCC1428	1290905	breast	216	190	26
SNU-61	1660035	digestive system	216	196	20
NCI-H1838	687807	lung	216	195	21
BB49-HNC	753532	aero-digestive tract	216	192	24
BEN	753534	lung	216	194	22
MS-1	753594	lung	216	193	23
U-266	753615	blood	216	193	23
KMS-12-BM	907281	blood	216	197	19
SW948	909757	digestive system	216	194	22
JHH-7	1240160	digestive system	215	195	20
ME-1	1330942	blood	215	199	16
Calu-3	687777	lung	215	194	21
NCI-H322M	905967	lung	215	194	21
NCI-H1105	908468	lung	215	196	19
SNU-449	909738	digestive system	215	192	23
AsPC-1	910702	pancreas	215	188	27
A3-KAW	910935	blood	215	192	23
CCK-81	1240123	digestive system	214	194	20
RC-K8	1330995	blood	214	190	24
ESO26	1503366	aero-digestive tract	214	193	21
SNU-175	1659928	digestive system	214	195	19
NCI-H2342	687819	lung	214	191	23
SW1573	724878	lung	214	194	20
D-542MG	753549	nervous system	214	191	23
TE-1	753621	aero-digestive tract	214	191	23
K-562	905940	blood	214	195	19
HT55	907287	digestive system	214	195	19
MRK-nu-1	908151	breast	214	190	24
NCI-N87	908461	digestive system	214	194	20
RCM-1	909263	digestive system	214	189	25
RVH-421	909706	skin	214	189	25
SW1116	909746	digestive system	214	192	22
RH-18	971774	soft tissue	214	193	21
G-MEL	1240130	skin	213	192	21
SW156	1240220	kidney	213	190	23
SU-DHL-4	1331035	blood	213	192	21
HT-115	907289	digestive system	213	191	22
MDA-MB-361	908121	breast	213	190	23
NCI-H1581	908471	lung	213	196	17
SK-LU-1	909721	lung	213	193	20
THP-1	909771	blood	213	191	22
BICR22	1240121	aero-digestive tract	212	192	20
CL-40	1240124	digestive system	212	191	21
Hep3B2-1-7	1240147	digestive system	212	189	23
NCI-H522	905944	lung	212	194	18
ABC-1	906791	lung	212	193	19
P31-FUJ	909253	blood	212	190	22
SCH	909711	digestive system	212	192	20
KM-H2	909976	blood	212	191	21
AU565	910704	breast	212	190	22
22RV1	924100	urogenital system	212	191	21
EW-12	949162	bone	212	194	18
NB17	949175	nervous system	212	193	19
HCC202	1290906	breast	211	186	25
EJM	1297447	blood	211	188	23
OVK-18	1480371	urogenital system	211	188	23
KYAE-1	1503368	aero-digestive tract	211	190	21
HCT-15	905937	digestive system	211	187	24
TE-441-T	924248	soft tissue	211	190	21
HCC-827	1240146	lung	210	190	20
PCI-6A	1240206	aero-digestive tract	210	188	22
Sci-1	1331031	blood	210	191	19
WSU-DLCL2	1331050	blood	210	189	21
RCC-MF	1524419	kidney	210	187	23
LK-2	687787	lung	210	191	19
VA-ES-BJ	688121	soft tissue	210	189	21
NCI-H292	753604	lung	210	190	20
NCI-H630	908482	digestive system	210	189	21
RPMI-2650	909700	aero-digestive tract	210	191	19
SIG-M5	909715	blood	210	192	18
SW48	909751	digestive system	210	190	20
UACC-812	910910	breast	210	189	21
A4-Fuk	910934	blood	210	190	20
NB14	949178	nervous system	210	190	20
IGR-37	1240153	skin	209	191	18
H3255	1247873	lung	209	185	24
PANC-04-03	1298476	pancreas	209	189	20
SKN-3	1299059	aero-digestive tract	209	189	20
NCI-H2347	687820	lung	209	188	21
SCC-3	910930	blood	209	187	22
EW-24	949168	bone	209	189	20
JHU-029	1298156	aero-digestive tract	208	185	23
HSC-39	1322224	digestive system	208	183	25
CP66-MEL	753546	skin	208	185	23
EC-GI-10	753555	aero-digestive tract	208	186	22
HO-1-u-1	753561	aero-digestive tract	208	187	21
T47D	905945	breast	208	185	23
GP5d	907291	digestive system	208	186	22
LNCaP-Clone-FGC	907788	urogenital system	208	189	19
SK-MEL-3	909724	skin	208	188	20
ST486	910906	blood	208	188	20
NEC8	910942	urogenital system	208	188	20
HO-1-N-1	924111	aero-digestive tract	208	188	20
AMO-1	1295741	blood	207	184	23
PL4	1298533	pancreas	207	187	20
DMS-273	687985	lung	207	187	20
NCI-H82	688031	lung	207	184	23
HL-60	905938	blood	207	188	19
A549	905949	lung	207	186	21
SK-OV-3	905959	urogenital system	207	189	18
EKVX	905970	lung	207	188	19
UACC-257	905977	skin	207	187	20
DEL	906836	blood	207	187	20
HT-3	907068	urogenital system	207	185	22
KMOE-2	907280	blood	207	186	21
K052	907284	blood	207	184	23
MHH-NB-11	908135	nervous system	207	184	23
C2BBe1	910700	digestive system	207	184	23
IM-95	1240155	digestive system	206	188	18
NCI-H2023	1240187	lung	206	184	22
ROS-50	1331025	blood	206	188	18
RCC-FG2	1524414	kidney	206	186	20
A253	906794	aero-digestive tract	206	185	21
DOHH-2	906842	blood	206	185	21
MN-60	908143	blood	206	183	23
P12-ICHIKAWA	909251	blood	206	186	20
RF-48	909697	digestive system	206	184	22
ZR-75-30	909907	breast	206	186	20
CHP-126	910567	nervous system	206	186	20
GAK	910932	skin	206	184	22
NCI-H841	1240192	lung	205	187	18
PCI-15A	1240204	aero-digestive tract	205	185	20
KON	1298215	aero-digestive tract	205	185	20
PCI-30	1298529	aero-digestive tract	205	184	21
OVCA420	1480364	urogenital system	205	184	21
ESO51	1503367	aero-digestive tract	205	182	23
HCC2157	749715	breast	205	187	18
DMS-79	753551	lung	205	187	18
HA7-RCC	753558	kidney	205	182	23
LB996-RCC	753585	kidney	205	185	20
EVSA-T	906862	breast	205	184	21
HN	907059	aero-digestive tract	205	185	20
CGTH-W-1	910568	thyroid	205	185	20
D-336MG	946369	nervous system	205	185	20
CTB-1	949088	blood	205	185	20
ES6	949157	bone	205	188	17
EW-16	949165	bone	205	187	18
NB1	949179	nervous system	205	187	18
KYM-1	1240166	soft tissue	204	181	23
TC-71	1240221	bone	204	185	19
JM1	1327768	blood	204	181	23
JSC-1	1327769	blood	204	183	21
NCI-H1693	687802	lung	204	188	16
NCI-H2291	724874	lung	204	181	23
HCC1395	749712	breast	204	185	19
CADO-ES1	753539	bone	204	185	19
NCI-H23	905942	lung	204	182	22
EHEB	906854	blood	204	180	24
H9	907043	blood	204	183	21
HuP-T3	907285	pancreas	204	183	21
DMS-53	907295	lung	204	182	22
KY821	907300	blood	204	186	18
KYSE-180	907318	aero-digestive tract	204	184	20
NCI-H520	908443	lung	204	187	17
RMG-I	909699	urogenital system	204	184	20
NCI-H1651	910900	lung	204	181	23
SW1990	910907	pancreas	204	182	22
TE-12	946356	aero-digestive tract	204	183	21
NCI-H2135	1298352	lung	203	182	21
SAT	1299050	aero-digestive tract	203	183	20
MOLP-8	1330950	blood	203	183	20
WIL2-NS	1331049	blood	203	184	19
TE-4	1503371	aero-digestive tract	203	184	19
MC-CAR	683665	blood	203	184	19
NCI-H1648	687799	lung	203	183	20
NCI-H1417	688001	lung	203	185	18
SK-N-DZ	688086	nervous system	203	183	20
NCI-H1563	753600	lung	203	180	23
HCT-116	905936	digestive system	203	182	21
RPMI-8226	905964	blood	203	184	19
D-283MED	906834	nervous system	203	185	18
HCC70	907048	breast	203	184	19
HuO9	907072	bone	203	185	18
IPC-298	907171	skin	203	182	21
KARPAS-45	907272	blood	203	185	18
LC-1F	907785	lung	203	180	23
NOMO-1	908451	blood	203	184	19
RPMI-6666	909701	blood	203	181	22
SCC-9	909709	aero-digestive tract	203	182	21
SW837	909755	digestive system	203	182	21
U-698-M	909777	blood	203	183	20
OE19	910079	aero-digestive tract	203	180	23
CESS	910688	blood	203	181	22
OCI-AML2	910947	blood	203	182	21
NCI-H211	1240189	lung	202	184	18
HCC-56	1290907	digestive system	202	181	21
Farage	1297449	blood	202	184	18
Hs-445	1322218	blood	202	182	20
SU-DHL-10	1331033	blood	202	184	18
OACp4C	1503362	aero-digestive tract	202	180	22
RCC-ER	1524417	kidney	202	181	21
NCI-H2085	687812	lung	202	180	22
SBC-5	713880	lung	202	184	18
LU-65	724863	lung	202	183	19
SHP-77	724872	lung	202	183	19
HCC1937	749714	breast	202	183	19
CAL-33	753541	aero-digestive tract	202	181	21
TE-15	753614	aero-digestive tract	202	182	20
TE-8	753623	aero-digestive tract	202	185	17
BxPC-3	906693	pancreas	202	183	19
ARH-77	906765	blood	202	180	22
AGS	906790	digestive system	202	182	20
EoL-1-cell	906856	blood	202	185	17
HH	907056	blood	202	180	22
KARPAS-299	907273	blood	202	180	22
KATOIII	907276	digestive system	202	181	21
LS-513	907795	digestive system	202	179	23
MDA-MB-134-VI	908119	breast	202	182	20
MDA-MB-453	908122	breast	202	181	21
NAMALWA	908159	blood	202	182	20
SNU-C2B	909740	digestive system	202	182	20
TUR	909773	blood	202	184	18
WSU-NHL	909785	blood	202	182	20
QIMR-WIL	910545	blood	202	178	24
MMAC-SF	925339	skin	202	181	21
NOS-1	925345	bone	202	180	22
BT-474	946359	breast	202	182	20
COLO-783	1240125	skin	201	183	18
NCI-H1944	1240185	lung	201	181	20
NCI-H847	1240193	lung	201	183	18
SUIT-2	1240219	pancreas	201	176	25
PCI-4B	1298531	aero-digestive tract	201	180	21
KARPAS-620	1327775	blood	201	178	23
SU-DHL-5	1331036	blood	201	183	18
SK-GT-2	1503364	digestive system	201	182	19
SNU-1040	1659823	digestive system	201	185	16
NCI-H2141	688014	lung	201	185	16
LU-139	713878	lung	201	182	19
SK-N-AS	724828	nervous system	201	178	23
HPAF-II	724869	pancreas	201	181	20
BB30-HNC	753531	aero-digestive tract	201	180	21
IM-9	753563	blood	201	182	19
ACHN	905950	kidney	201	181	20
A2780	906804	urogenital system	201	181	20
GCIY	906869	digestive system	201	180	21
HCC1806	907047	breast	201	182	19
KG-1	907278	blood	201	182	19
NH-12	908447	nervous system	201	177	24
NCI-H1793	908463	lung	201	178	23
NCI-H28	908470	lung	201	181	20
SK-MEL-31	909727	skin	201	178	23
SK-PN-DW	909731	bone	201	182	19
COR-L279	910937	lung	201	184	17
MDA-MB-415	924240	breast	201	179	22
NCI-H810	925341	lung	201	184	17
TT	930299	thyroid	201	182	19
EW-7	949160	bone	201	182	19
EW-1	949163	bone	201	183	18
EN	1240127	urogenital system	200	183	17
H513	1240141	lung	200	182	18
SUP-B15	1247871	blood	200	178	22
451Lu	1287706	skin	200	180	20
CL-11	1290769	digestive system	200	178	22
OCUM-1	1298358	digestive system	200	182	18
TOV-112D	1299070	urogenital system	200	183	17
SU-DHL-8	1331038	blood	200	181	19
SUP-HD1	1331039	blood	200	183	17
SNU-407	1660034	digestive system	200	179	21
SNU-C5	1674021	digestive system	200	182	18
NCI-H526	688025	lung	200	181	19
VMRC-LCD	713869	lung	200	179	21
BB65-RCC	753533	kidney	200	176	24
MZ7-mel	753596	skin	200	180	20
BE2-M17	753616	nervous system	200	178	22
SK-MEL-2	905955	skin	200	180	20
OVCAR-5	905969	urogenital system	200	181	19
ETK-1	906861	digestive system	200	183	17
HCC1419	907045	breast	200	179	21
KNS-42	907282	nervous system	200	179	21
LS-411N	907794	digestive system	200	181	19
NCI-H1666	908473	lung	200	178	22
SKM-1	909722	blood	200	180	20
SK-MEL-24	909725	skin	200	176	24
SK-MES-1	909728	lung	200	179	21
PSN1	910546	pancreas	200	177	23
A427	910851	lung	200	184	16
CAL-27	910916	aero-digestive tract	200	178	22
LS-1034	917486	digestive system	200	180	20
TE-9	946353	aero-digestive tract	200	179	21
H3118	1240140	aero-digestive tract	199	179	20
HARA	1240142	lung	199	179	20
HCC-15	1240143	lung	199	177	22
RERF-GC-1B	1240209	digestive system	199	181	18
201T	1287381	lung	199	177	22
JHH-1	1298151	digestive system	199	182	17
NCI-H1435	1298347	lung	199	179	20
NCI-H2110	1298351	lung	199	176	23
PANC-02-03	1298475	pancreas	199	181	18
KARPAS-1106P	1327773	blood	199	181	18
OCI-AML5	1330983	blood	199	179	20
SUP-M2	1331040	blood	199	180	19
OACM5-1	1503363	aero-digestive tract	199	176	23
EMC-BAC-2	1503370	lung	199	178	21
SW780	687457	urogenital system	199	180	19
NCI-H1355	724866	lung	199	180	19
NCI-H510A	753605	lung	199	182	17
SF295	905985	nervous system	199	176	23
DG-75	906838	blood	199	182	17
H4	907042	nervous system	199	178	21
HEC-1	907051	urogenital system	199	178	21
HSC-4	907062	aero-digestive tract	199	180	19
L-428	907322	blood	199	176	23
NCI-SNU-5	908445	digestive system	199	178	21
NCI-H1993	908476	lung	199	177	22
Ramos-2G6-4C10	910401	blood	199	179	20
YT	946358	blood	199	177	22
HCC-44	1240145	lung	198	177	21
NCI-H3122	1240190	lung	198	177	21
HDQ-P1	1290922	breast	198	177	21
Hs-940-T	1298145	skin	198	177	21
PA-TU-8902	1298526	pancreas	198	178	20
RERF-LC-Sq1	1298538	lung	198	174	24
ES7	684059	bone	198	179	19
C-4-I	687506	urogenital system	198	178	20
8-MG-BA	687562	nervous system	198	180	18
SBC-1	713885	lung	198	179	19
NCI-H727	724855	lung	198	175	23
NCI-H1792	724868	lung	198	176	22
HCC1143	749710	breast	198	180	18
EBC-1	753554	lung	198	177	21
KYSE-520	753575	aero-digestive tract	198	175	23
COLO-205	905961	digestive system	198	175	23
HOP-92	905973	lung	198	177	21
COLO-680N	906817	aero-digestive tract	198	176	22
EB2	906846	blood	198	176	22
IMR-5	907170	nervous system	198	177	21
JEG-3	907176	urogenital system	198	178	20
JVM-3	907270	blood	198	177	21
HuP-T4	907286	pancreas	198	176	22
KYSE-450	907320	aero-digestive tract	198	183	15
PF-382	909260	blood	198	177	21
RKO	909698	digestive system	198	181	17
SAS	909708	aero-digestive tract	198	181	17
SW1417	909747	digestive system	198	177	21
CW-2	910554	digestive system	198	178	20
SCC-4	910904	aero-digestive tract	198	178	20
ALL-PO	910944	blood	198	179	19
L-363	924239	blood	198	179	19
CAMA-1	946382	breast	198	180	18
EW-18	949164	bone	198	182	16
NB10	949171	nervous system	198	177	21
RH-1	971773	soft tissue	198	181	17
LS-180	998189	digestive system	198	177	21
IHH-4	1240154	thyroid	197	177	20
JHU-022	1240162	aero-digestive tract	197	175	22
OVKATE	1240199	urogenital system	197	177	20
SU8686	1240218	pancreas	197	173	24
WM278	1240226	skin	197	174	23
EFM-192A	1290798	breast	197	175	22
KYSE-50	1298222	aero-digestive tract	197	178	19
NCI-H2172	1298353	lung	197	175	22
SCC90	1299052	aero-digestive tract	197	176	21
NCI-H1694	688006	lung	197	179	18
NCI-H650	722066	lung	197	179	18
HCC1187	749711	breast	197	181	16
LB771-HNC	753583	aero-digestive tract	197	178	19
CAPAN-1	753624	pancreas	197	176	21
SK-MEL-28	905954	skin	197	177	20
ECC12	906849	digestive system	197	177	20
HT-144	907067	skin	197	177	20
KU812	907311	blood	197	179	18
LC-2-ad	907786	lung	197	177	20
NCI-H1155	908467	lung	197	178	19
SW872	909756	soft tissue	197	174	23
COLO-668	910692	lung	197	175	22
TGBC24TKB	910695	digestive system	197	179	18
SCC-25	910701	aero-digestive tract	197	177	20
A704	910920	kidney	197	176	21
CaR-1	924108	digestive system	197	177	20
SW954	924247	urogenital system	197	176	21
NBsusSR	925342	nervous system	197	179	18
H2869	1240138	lung	196	178	18
Hs-683	1240150	nervous system	196	176	20
KYSE-220	1240167	aero-digestive tract	196	175	21
NCI-H1836	1240182	lung	196	179	17
CL-34	1290771	digestive system	196	176	20
JEKO-1	1327765	blood	196	176	20
NCI-H2066	1330973	lung	196	178	18
NU-DUL-1	1330982	blood	196	174	22
OV-56	1480362	urogenital system	196	174	22
RCC-JF	1524415	kidney	196	176	20
KMS-11	1659817	blood	196	175	21
ES5	684057	bone	196	179	17
COLO-829	687448	skin	196	175	21
A172	687563	nervous system	196	176	20
NCI-H1770	687804	lung	196	179	17
NCI-H2126	687814	lung	196	172	24
LU-135	713899	lung	196	177	19
NCI-H2087	724834	lung	196	179	17
CP50-MEL-B	753545	skin	196	176	20
CPC-N	753547	lung	196	178	18
DSH1	753552	urogenital system	196	178	18
IST-SL1	753564	lung	196	178	18
KP-4	753572	pancreas	196	178	18
LB2518-MEL	753579	skin	196	177	19
LB373-MEL-D	753581	skin	196	179	17
HT-29	905939	digestive system	196	176	20
MCF7	905946	breast	196	176	20
CCRF-CEM	905952	blood	196	179	17
HCC2998	905971	digestive system	196	176	20
HOP-62	905972	lung	196	175	21
BHT-101	906696	thyroid	196	174	22
697	906800	blood	196	174	22
ECC4	906850	digestive system	196	178	18
EFM-19	906851	breast	196	177	19
EM-2	906855	blood	196	176	20
HLE	907057	digestive system	196	178	18
HT-1376	907066	urogenital system	196	176	20
HUTU-80	907073	digestive system	196	180	16
MDA-MB-468	908123	breast	196	179	17
OC-314	909257	urogenital system	196	181	15
SK-HEP-1	909719	digestive system	196	177	19
SNU-423	909737	digestive system	196	175	21
SW962	909758	urogenital system	196	174	22
SUP-B8	910209	blood	196	177	19
NCI-H146	910899	lung	196	181	15
RERF-LC-MS	910931	lung	196	175	21
LAN-6	949170	nervous system	196	177	19
SNU-398	1240217	digestive system	195	180	15
HCC-78	1290908	lung	195	176	19
Hs-766T	1298141	pancreas	195	175	20
OSC-19	1298362	aero-digestive tract	195	174	21
WM793B	1299081	skin	195	173	22
GRANTA-519	1303897	blood	195	177	18
COR-L321	1322213	lung	195	174	21
NB4	1323913	blood	195	177	18
KCL-22	1330931	blood	195	175	20
SNU-81	1660036	digestive system	195	175	20
NCI-H2030	722045	lung	195	176	19
NCI-H2122	722046	lung	195	174	21
HCE-4	753559	aero-digestive tract	195	175	20
KNS-62	753569	lung	195	175	20
786-0	905947	kidney	195	176	19
A498	905948	kidney	195	175	20
IGROV-1	905968	urogenital system	195	178	17
KM12	905989	digestive system	195	176	19
A375	906793	skin	195	175	20
DU-4475	906844	breast	195	173	22
SH-4	909713	skin	195	176	19
SK-MEL-30	909726	skin	195	175	20
SNU-475	909739	digestive system	195	175	20
SUP-T1	909743	blood	195	175	20
OAW-42	910548	urogenital system	195	174	21
ATN-1	910687	blood	195	174	21
BALL-1	910705	blood	195	174	21
BL-41	910706	blood	195	178	17
23132-87	910924	digestive system	195	173	22
RO82-W-1	930083	thyroid	195	176	19
TE-11	946354	aero-digestive tract	195	176	19
Caov-4	949090	urogenital system	195	178	17
NB13	949177	nervous system	195	177	18
MDA-MB-436	1240172	breast	194	173	21
NCI-H1869	1240183	lung	194	173	21
OCI-AML3	1290455	blood	194	172	22
CS1	1290795	bone	194	174	20
KP-2	1298218	pancreas	194	175	19
QGP-1	1298534	pancreas	194	174	20
TASK1	1299067	nervous system	194	176	18
GA-10	1303896	blood	194	175	19
JJN-3	1327766	blood	194	174	20
SU-DHL-16	1331034	blood	194	176	18
MM1S	1659818	blood	194	175	19
5637	687452	urogenital system	194	173	21
NCI-H720	687600	lung	194	175	19
NCI-H1623	687798	lung	194	173	21
NCI-H69	688027	lung	194	176	18
KYSE-140	753573	aero-digestive tract	194	175	19
LCLC-103H	753586	lung	194	174	20
SF539	905984	nervous system	194	176	18
BT-20	906801	breast	194	174	20
C32	906830	skin	194	174	20
G-361	906865	skin	194	174	20
HMV-II	907058	skin	194	174	20
JiyoyeP-2003	907268	blood	194	176	18
KU-19-19	907312	urogenital system	194	173	21
KYSE-270	907319	aero-digestive tract	194	178	16
LC4-1	907787	blood	194	179	15
MC116	907799	blood	194	176	18
MV-4-11	908156	blood	194	176	18
NCI-H1573	908472	lung	194	173	21
OPM-2	909249	blood	194	172	22
Saos-2	909707	bone	194	176	18
SK-MEL-1	909723	skin	194	175	19
SNU-387	909736	digestive system	194	173	21
SU-DHL-1	909742	blood	194	175	19
SW13	909744	kidney	194	177	17
HuO-3N1	909977	bone	194	177	17
A204	910784	soft tissue	194	176	18
SCC-15	910911	aero-digestive tract	194	174	20
AM-38	910933	nervous system	194	173	21
BT-483	949093	breast	194	175	19
JHH-4	1240158	digestive system	193	172	21
MS751	1240179	urogenital system	193	173	20
OSC-20	1240196	aero-digestive tract	193	174	19
OVISE	1240198	urogenital system	193	175	18
PE-CA-PJ15	1240207	aero-digestive tract	193	174	19
PL18	1240208	pancreas	193	176	17
SKN	1240215	urogenital system	193	176	17
DAN-G	1290797	pancreas	193	172	21
COR-L303	1297438	lung	193	177	16
SW1271	1299062	lung	193	177	16
WM35	1299080	skin	193	171	22
JURL-MK1	1327771	blood	193	174	19
OCI-LY-19	1330984	blood	193	174	19
OCI-M1	1330985	blood	193	175	18
EW-11	684062	bone	193	178	15
SK-ES-1	684072	bone	193	176	17
ME-180	687514	urogenital system	193	174	19
NCI-H2405	687821	lung	193	171	22
CAL-12T	753540	lung	193	175	18
KYSE-70	753576	aero-digestive tract	193	173	20
LB1047-RCC	753577	kidney	193	174	19
MZ1-PC	753595	pancreas	193	174	19
KELLY	753618	nervous system	193	176	17
TE-10	753622	aero-digestive tract	193	175	18
SF268	905986	nervous system	193	175	18
CFPAC-1	906821	pancreas	193	174	19
HC-1	907044	blood	193	175	18
HSC-3	907061	aero-digestive tract	193	172	21
MHH-PREB-1	908136	blood	193	173	20
NUGC-3	908455	digestive system	193	175	18
RPMI-8402	909702	blood	193	174	19
SK-UT-1	909732	soft tissue	193	172	21
SW626	909753	urogenital system	193	177	16
NCI-H838	910399	lung	193	172	21
RL	910861	blood	193	177	16
HAL-01	949153	blood	193	172	21
EW-3	949161	bone	193	176	17
FU-OV-1	1240129	urogenital system	192	173	19
Ishikawa(Heraklio)02ER-	1240156	urogenital system	192	171	21
JHH-6	1240159	digestive system	192	171	21
JHU-011	1240161	aero-digestive tract	192	174	18
OV-90	1240197	urogenital system	192	173	19
H2461	1290810	lung	192	170	22
KMRC-1	1298168	kidney	192	172	20
T-T	1299064	aero-digestive tract	192	172	20
HCC1500	1303900	breast	192	171	21
RCH-ACV	1330994	blood	192	170	22
SLVL	1331032	blood	192	172	20
TK	1331045	blood	192	174	18
JHOS-3	1480358	urogenital system	192	175	17
RCC-JW	1524416	kidney	192	172	20
SK-N-FI	688087	nervous system	192	176	16
SW756	724839	urogenital system	192	173	19
Calu-6	724859	lung	192	173	19
SW900	724879	lung	192	173	19
HCC1954	749709	breast	192	174	18
BHY	753535	aero-digestive tract	192	171	21
LU-165	753589	lung	192	175	17
PC-14	753608	lung	192	170	22
DU-145	905935	urogenital system	192	174	18
NCI-H226	905941	lung	192	174	18
HuCCT1	907069	digestive system	192	173	19
J-RT3-T3-5	907391	blood	192	175	17
LOUCY	907789	blood	192	173	19
LS-123	907792	digestive system	192	174	18
MFE-280	908129	urogenital system	192	173	19
NCI-SNU-1	908444	digestive system	192	173	19
NTERA-S-cl-D1	908454	urogenital system	192	176	16
NCI-H748	909194	lung	192	174	18
U-2-OS	909776	bone	192	172	20
RPMI-8866	910544	blood	192	175	17
CAL-85-1	910852	breast	192	176	16
BFTC-905	910926	urogenital system	192	174	18
MDA-MB-157	925338	breast	192	173	19
JHH-2	1240157	digestive system	191	169	22
PCI-38	1240205	aero-digestive tract	191	172	19
SISO	1240212	urogenital system	191	169	22
HPAC	1298136	pancreas	191	173	18
JIMT-1	1298157	breast	191	171	20
LC-1-sq	1298223	lung	191	168	23
OVTOKO	1298365	urogenital system	191	172	19
L-1236	1330935	blood	191	171	20
MDA-MB-330	1330941	breast	191	172	19
MOLM-16	1330948	blood	191	172	19
NCI-H2170	687815	lung	191	174	17
NCI-H2029	688011	lung	191	173	18
NCI-H378	688022	lung	191	175	16
IST-SL2	753565	lung	191	172	19
KYSE-410	753574	aero-digestive tract	191	170	21
NCI-H1304	753599	lung	191	173	18
U031	905981	kidney	191	169	22
ACN	906803	nervous system	191	173	18
COLO-824	906812	breast	191	172	19
G-401	907299	kidney	191	170	21
LAMA-84	907783	blood	191	173	18
MHH-CALL-2	908132	blood	191	172	19
NKM-1	908448	blood	191	172	19
NCI-H596	908459	lung	191	172	19
NCI-H1755	908475	lung	191	171	20
PA-1	909255	urogenital system	191	174	17
CA46	910703	blood	191	172	19
NY	910849	bone	191	173	18
CHL-1	910853	skin	191	174	17
DOK	910936	aero-digestive tract	191	171	20
CHP-134	910941	nervous system	191	175	16
NCI-H250	924241	lung	191	174	17
PANC-08-13	925347	pancreas	191	172	19
ES8	949155	bone	191	173	18
ALL-SIL	1295740	blood	190	171	19
COR-L95	1297439	lung	190	173	17
DND-41	1297446	blood	190	170	20
KP-3	1298219	pancreas	190	170	20
NCI-H1781	1298350	lung	190	171	19
OE21	1298359	aero-digestive tract	190	170	20
STS-0421	1299061	soft tissue	190	171	19
PEO1	1480372	urogenital system	190	174	16
OCI-LY7	1659819	blood	190	171	19
RT4	687455	urogenital system	190	170	20
TCCSUP	687459	urogenital system	190	168	22
YKG-1	687592	nervous system	190	168	22
NCI-H661	687829	lung	190	172	18
NCI-H2052	688058	lung	190	173	17
UM-UC-3	724838	urogenital system	190	174	16
HCC1599	749713	breast	190	172	18
HCC38	749717	breast	190	173	17
KOSC-2	753570	aero-digestive tract	190	171	19
LB647-SCLC	753582	lung	190	173	17
CAKI-1	905963	kidney	190	168	22
SR	905965	blood	190	171	19
COR-L105	906805	lung	190	168	22
DBTRG-05MG	906835	nervous system	190	170	20
GDM-1	906870	blood	190	169	21
G-402	907298	soft tissue	190	172	18
KP-N-YN	907314	nervous system	190	172	18
MEL-JUSO	908125	skin	190	169	21
MSTO-211H	908152	lung	190	171	19
NCI-H747	908457	digestive system	190	172	18
NCI-H1703	908474	lung	190	172	18
SJRH30	909716	soft tissue	190	175	15
SNG-M	909735	urogenital system	190	171	19
TGBC11TKB	909770	digestive system	190	170	20
YAPC	909904	pancreas	190	171	19
COLO-678	910689	digestive system	190	169	21
LN-405	910694	nervous system	190	171	19
BFTC-909	910698	kidney	190	170	20
AN3-CA	910781	urogenital system	190	172	18
BCPAP	924104	thyroid	190	168	22
SKG-IIIa	930298	urogenital system	190	173	17
D-392MG	946370	nervous system	190	173	17
EW-22	949167	bone	190	171	19
BICR78	1240122	aero-digestive tract	189	170	19
H2731	1240134	lung	189	170	19
H2803	1240135	lung	189	169	20
ML-1	1240178	thyroid	189	168	21
OVMIU	1240200	urogenital system	189	171	18
PA-TU-8988T	1240201	pancreas	189	173	16
PC-3_[JPC-3]	1240202	lung	189	173	16
TOV-21G	1240222	urogenital system	189	171	18
NCI-H1568	1298348	lung	189	169	20
RERF-LC-KJ	1298537	lung	189	168	21
MEC-1	1330943	blood	189	168	21
P32-ISH	1330987	blood	189	170	19
IOSE-523(-)	1479993	urogenital system	189	171	18
SK-GT-4	1503365	aero-digestive tract	189	171	18
42-MG-BA	687561	nervous system	189	170	19
NCI-H2228	687816	lung	189	168	21
NCI-H209	688013	lung	189	175	14
NCI-H2227	688018	lung	189	175	14
LU-134-A	753588	lung	189	173	16
SBC-3	753610	lung	189	172	17
MOLT-4	905958	blood	189	168	21
COR-L88	906808	lung	189	175	14
EGI-1	906853	digestive system	189	171	18
HCC1569	907046	breast	189	171	18
KE-37	907277	blood	189	172	17
LP-1	907791	blood	189	170	19
MFE-296	908130	urogenital system	189	170	19
MKN28	908139	digestive system	189	172	17
ML-2	908141	blood	189	171	18
NCI-H716	908458	digestive system	189	167	22
SK-CO-1	909718	digestive system	189	175	14
CMK	910566	blood	189	171	18
CAL-54	910952	kidney	189	170	19
NCI-H1975	924244	lung	189	170	19
ES4	949156	bone	189	171	18
H2804	1240136	lung	188	168	20
SNU-182	1240216	digestive system	188	170	18
CHSA0108	1290768	bone	188	166	22
NCI-H2286	1298355	lung	188	170	18
NCI-H1092	687997	lung	188	171	17
NCI-H187	688007	lung	188	169	19
BOKU	753536	urogenital system	188	168	20
J82	753566	urogenital system	188	169	19
PC-3	905934	urogenital system	188	169	19
SK-MEL-5	905956	skin	188	169	19
SN12C	905979	kidney	188	169	19
FADU	906863	aero-digestive tract	188	170	18
JVM-2	907269	blood	188	166	22
KYSE-510	907321	aero-digestive tract	188	170	18
Mewo	908128	skin	188	170	18
MOLT-13	908146	blood	188	168	20
NMC-G1	908449	nervous system	188	166	22
NCI-H2196	908481	lung	188	170	18
OS-RC-2	909250	kidney	188	168	20
RT-112	909704	urogenital system	188	168	20
OE33	910549	aero-digestive tract	188	171	17
RPMI-7951	910903	skin	188	169	19
CAL-39	924107	urogenital system	188	168	20
HDLM-2	924110	blood	188	167	21
KLE	924187	urogenital system	188	171	17
MKN7	924250	digestive system	188	170	18
ES1	949158	bone	188	170	18
Hs-633T	1240149	soft tissue	187	169	18
MDST8	1240173	digestive system	187	169	18
HeLa	1298134	urogenital system	187	167	20
K2	1298160	skin	187	168	19
KP-1N	1298216	pancreas	187	167	20
SCaBER	1299051	urogenital system	187	169	18
COR-L32	1322212	lung	187	170	17
JHOS-4	1480359	urogenital system	187	170	17
PFSK-1	683667	nervous system	187	171	16
A673	684052	soft tissue	187	169	18
ES3	684055	bone	187	169	18
T98G	687586	nervous system	187	170	17
NCI-H1650	687800	lung	187	166	21
NCI-H1734	722058	lung	187	167	20
TE-5	735784	aero-digestive tract	187	168	19
NCI-H835	753607	lung	187	171	16
OVCAR-3	905933	urogenital system	187	169	18
SNB75	905982	nervous system	187	171	16
BE-13	906763	blood	187	168	19
A2058	906792	skin	187	170	17
647-V	906797	urogenital system	187	170	17
COLO-741	906815	digestive system	187	168	19
Detroit562	906837	aero-digestive tract	187	167	20
DoTc2-4510	906843	urogenital system	187	168	19
GR-ST	906877	blood	187	168	19
L-540	907323	blood	187	168	19
MEL-HO	908124	skin	187	168	19
MKN1	908138	digestive system	187	168	19
MONO-MAC-6	908148	blood	187	170	17
NCI-H1436	908469	lung	187	173	14
OCUB-M	909256	breast	187	168	19
SK-NEP-1	909730	kidney	187	172	15
TGBC1TKB	909769	digestive system	187	168	19
VM-CUB-1	909780	urogenital system	187	168	19
769-P	910922	kidney	187	167	20
CAL-51	910927	breast	187	168	19
MFM-223	910948	breast	187	171	16
K5	924238	thyroid	187	167	20
BICR31	1290725	aero-digestive tract	186	169	17
CAL-29	1290730	urogenital system	186	168	18
CHSA0011	1290767	bone	186	169	17
KMRC-20	1298169	kidney	186	168	18
LOU-NH91	1298226	lung	186	167	19
RKN	1298539	urogenital system	186	168	18
FLO-1	1503361	aero-digestive tract	186	168	18
EMC-BAC-1	1503369	lung	186	168	18
NCC010	1509073	kidney	186	167	19
C-33-A	687505	urogenital system	186	167	19
COR-L23	687780	lung	186	167	19
NCI-H1048	687995	lung	186	169	17
T-24	724812	urogenital system	186	165	21
NCI-H2009	724873	lung	186	166	20
M14	905975	skin	186	166	20
UACC-62	905976	skin	186	170	16
TK10	905980	kidney	186	168	18
Becker	906746	nervous system	186	168	18
CRO-AP2	906807	blood	186	166	20
CCF-STTG1	906823	nervous system	186	168	18
DB	906832	blood	186	167	19
HGC-27	907055	digestive system	186	168	18
HT-1080	907064	soft tissue	186	169	17
HT-1197	907065	urogenital system	186	166	20
LU-99A	907796	lung	186	169	17
MES-SA	908127	urogenital system	186	168	18
A388	910697	skin	186	166	20
PANC-03-27	925346	pancreas	186	170	16
RL95-2	930082	urogenital system	186	166	20
NB7	949174	nervous system	186	169	17
NB5	949176	nervous system	186	167	19
H2591	1240131	lung	185	166	19
Hs746T	1240151	digestive system	185	165	20
MFE-319	1240174	urogenital system	185	168	17
NCI-H647	1240191	lung	185	166	19
TT2609-C02	1240223	thyroid	185	166	19
H2369	1290808	lung	185	167	18
NCI-H2444	1298356	lung	185	166	19
WM1552C	1299078	skin	185	165	20
PL-21	1330991	blood	185	167	18
RCC-AB	1524418	kidney	185	166	19
GB-1	687568	nervous system	185	164	21
DMS-114	687983	lung	185	169	16
NCI-H345	688021	lung	185	169	16
OVCAR-8	905991	urogenital system	185	169	16
COLO-800	906813	skin	185	169	16
COLO-792	906814	skin	185	163	22
COLO-679	906818	skin	185	166	19
CHP-212	906820	nervous system	185	166	19
CAL-120	906826	breast	185	167	18
ESS-1	907000	urogenital system	185	168	17
GT3TKB	907041	digestive system	185	169	16
IGR-1	907169	skin	185	167	18
KALS-1	907271	nervous system	185	167	18
KARPAS-422	907274	blood	185	169	16
MEG-01	908126	blood	185	166	19
MLMA	908142	blood	185	169	16
MOG-G-CCM	908144	nervous system	185	168	17
Mo-T	908149	blood	185	165	20
MPP-89	908150	lung	185	169	16
NB69	908440	nervous system	185	166	19
NCI-H358	908465	lung	185	167	18
ONS-76	909248	nervous system	185	166	19
COLO-320-HSR	910569	digestive system	185	168	17
Capan-2	910915	pancreas	185	171	14
CML-T1	910951	blood	185	166	19
KNS-81-FD	924188	nervous system	185	167	18
M059J	949094	nervous system	185	166	19
NCI-H196	1240186	lung	184	166	18
U-87-MG	687590	nervous system	184	164	20
HSC-2	753562	aero-digestive tract	184	165	19
MDA-MB-231	905960	breast	184	167	17
EFO-27	906852	urogenital system	184	166	18
KINGS-1	907279	nervous system	184	166	18
MG-63	908131	bone	184	165	19
REH	909696	blood	184	163	21
SW1088	909745	nervous system	184	165	19
YH-13	909905	nervous system	184	168	16
IA-LM	910779	lung	184	165	19
HTC-C3	924151	thyroid	184	166	18
TE-6	946355	aero-digestive tract	184	165	19
EW-13	949166	bone	184	166	18
MZ2-MEL	971777	skin	184	164	20
LN-18	1240168	nervous system	183	162	21
NB(TU)1-10	1240181	nervous system	183	166	17
H2373	1290809	lung	183	166	17
IOSE-397	1479992	urogenital system	183	168	15
IOSE-75-16SV40	1479994	urogenital system	183	167	16
JHOS-2	1479995	urogenital system	183	166	17
NCC021	1509074	kidney	183	165	18
ChaGo-K-1	687596	lung	183	164	19
NCI-H1963	688010	lung	183	166	17
NCI-H446	688023	lung	183	168	15
LXF-289	753592	lung	183	165	18
Hs-578-T	905957	breast	183	168	15
DK-MG	906839	nervous system	183	167	16
GAMG	906868	nervous system	183	166	17
GI-1	906871	nervous system	183	166	17
GCT	906999	soft tissue	183	163	20
IST-MES1	907173	lung	183	165	18
SJSA-1	909717	bone	183	162	21
SK-MG-1	909729	nervous system	183	167	16
A101D	910921	skin	183	165	18
S-117	910946	thyroid	183	166	17
OAW-28	946360	urogenital system	183	167	16
LCLC-97TM1	946361	lung	183	167	16
D-423MG	946372	nervous system	183	166	17
Jurkat	998184	blood	183	165	18
ES-2	1240128	urogenital system	182	164	18
HCC-366	1240144	lung	182	163	19
LNZTA3WT4	1240170	nervous system	182	162	20
BICR10	1290724	aero-digestive tract	182	163	19
G-292-Clone-A141B1	1290807	bone	182	164	18
H2818	1290814	lung	182	163	19
NCI-H1341	1330964	lung	182	163	19
UWB1.289	1480374	urogenital system	182	165	17
NCI-H1395	684681	lung	182	164	18
U-118-MG	687588	nervous system	182	167	15
COR-L311	687980	lung	182	165	17
Ca9-22	753538	aero-digestive tract	182	166	16
639-V	906798	urogenital system	182	166	16
Ca-Ski	906824	urogenital system	182	165	17
FTC-133	906864	thyroid	182	164	18
HD-MY-Z	907050	blood	182	165	17
SW1710	909749	urogenital system	182	165	17
SW1783	909750	nervous system	182	163	19
SW684	909754	soft tissue	182	164	18
KURAMOCHI	909975	urogenital system	182	163	19
KGN	924186	urogenital system	182	166	16
SiHa	930297	urogenital system	182	161	21
D-247MG	946367	nervous system	182	166	16
NCI-H1915	1240184	lung	181	163	18
KARPAS-231	1327774	blood	181	163	18
PWR-1E	1330993	urogenital system	181	164	17
IOSE-364(-)	1479991	urogenital system	181	164	17
OV-17R	1480361	urogenital system	181	165	16
LB831-BLC	753584	urogenital system	181	163	18
GOTO	906875	nervous system	181	165	16
HOS	907060	bone	181	165	16
NALM-6	908158	blood	181	162	19
no-10	908452	nervous system	181	163	18
NCI-H441	908460	lung	181	162	19
NCI-H2452	908462	lung	181	164	17
BV-173	910710	blood	181	162	19
TGW	910780	nervous system	181	165	16
BC-1	910919	blood	181	162	19
A431	910925	skin	181	165	16
BPH-1	924105	urogenital system	181	163	18
NB6	949173	nervous system	181	167	14
ASH-3	1290722	thyroid	180	161	19
H2722	1290812	lung	180	163	17
JHU-028	1298154	aero-digestive tract	180	163	17
CHSA8926	1303912	bone	180	165	15
OV-7	1480360	urogenital system	180	164	16
CTV-1	753548	blood	180	165	15
U251	905983	nervous system	180	162	18
OVCAR-4	905990	urogenital system	180	160	20
Daoy	906833	nervous system	180	161	19
KS-1	907313	nervous system	180	163	17
MOLT-16	908147	blood	180	162	18
RS4-11	909703	blood	180	165	15
SF126	909712	nervous system	180	162	18
D-566MG	946377	nervous system	180	165	15
DOV13	1479987	urogenital system	179	161	18
NCI-H1299	724831	lung	179	163	16
RXF393	905978	kidney	179	158	21
DJM-1	906841	skin	179	164	15
SK-LMS-1	909720	soft tissue	179	161	18
WM-115	909784	skin	179	160	19
D-502MG	946373	nervous system	179	160	19
H2795	1290813	lung	178	158	20
KOPN-8	1330933	blood	178	160	18
GMS-10	906873	nervous system	178	160	18
RD	909264	soft tissue	178	162	16
SW982	909759	soft tissue	178	161	17
TYK-nu	909774	urogenital system	178	163	15
MFH-ino	925343	soft tissue	178	159	19
Hey	1479988	urogenital system	177	162	15
KYSE-150	907317	aero-digestive tract	177	159	18
8505C	924102	thyroid	177	161	16
H2810	1240137	lung	176	158	18
LN-229	1240169	nervous system	176	154	22
CAL-62	906828	thyroid	176	159	17
VMRC-RCZ	909781	kidney	176	157	19
H2595	1240132	lung	175	157	18
RH-41	1240210	soft tissue	175	160	15
NCI-H1876	1330972	lung	175	159	16
GI-ME-N	906872	nervous system	175	158	17
MOG-G-UVW	908145	nervous system	175	160	15
CAS-1	910943	nervous system	175	160	15
H290	1240139	lung	174	159	15
CAL-72	906827	bone	174	157	17
no-11	908450	nervous system	173	157	16
8305C	906795	thyroid	172	156	16
CAL-78	1290765	bone	171	156	15
BT-549	905951	breast	171	156	15
LOXIMVI	905974	skin	171	157	14
D-263MG	946368	nervous system	171	156	15
IST-MEL1	907172	skin	167	149	18

## Sheet: Transporters - #Cell Lines
Transporter	#Cell lines expressing
ABCB10	985
ABCB7	985
ABCC10	985
ABCC5	985
ABCD3	985
ABCE1	985
ABCF1	985
ABCF2	985
MTCH1	985
MTCH2	985
SLC17A5	985
SLC20A1	985
SLC25A1	985
SLC25A11	985
SLC25A16	985
SLC25A17	985
SLC25A19	985
SLC25A26	985
SLC25A28	985
SLC25A3	985
SLC25A32	985
SLC25A39	985
SLC25A40	985
SLC25A5	985
SLC25A6	985
SLC26A6	985
SLC27A4	985
SLC2A1	985
SLC2A6	985
SLC30A5	985
SLC30A7	985
SLC30A9	985
SLC31A1	985
SLC33A1	985
SLC35A1	985
SLC35A2	985
SLC35A3	985
SLC35A4	985
SLC35A5	985
SLC35B1	985
SLC35B2	985
SLC35B3	985
SLC35C2	985
SLC35E3	985
SLC38A9	985
SLC39A1	985
SLC39A13	985
SLC39A6	985
SLC39A7	985
SLC3A2	985
SLC41A3	985
SLC50A1	985
SLC52A2	985
SLC6A8	985
SLC7A1	985
SLC7A5	985
SLC7A6	985
SLC9A6	985
UCP2	985
FLVCR1	984
SLC11A2	984
SLC1A5	984
SLC25A15	984
SLC25A37	984
SLC37A4	984
SLC38A10	984
SLC39A10	984
SLC7A11	984
SLCO4A1	984
ABCC1	983
SLC12A9	983
SLC25A10	983
SLC25A13	983
SLC25A14	983
SLC25A36	983
SLC25A38	983
SLC35F5	983
SLC38A2	983
SLC44A1	983
SLC35B4	982
SLC39A11	982
SLC41A1	982
SLC4A7	982
SLC9A8	982
SLC25A22	981
SLC25A29	981
SLC5A6	981
SLC15A4	980
SLC25A12	978
SLC26A2	978
SLC30A6	978
SLC10A3	977
SLC1A4	977
SLC30A1	977
SLC4A2	977
ABCD4	976
SLC25A46	976
SLC38A6	974
SLC16A1	973
SLC44A2	973
SLC12A7	972
SLC22A5	972
SLC22A18	971
SLC38A1	967
SLC38A7	967
SLC39A9	966
SLC25A20	965
SLC20A2	963
TAP1	961
SLC12A2	959
SLC35E2	958
SLC27A5	952
SLC19A2	949
SLC39A5	949
SLC45A4	949
SLC39A4	947
SLC25A24	944
SLC35C1	941
SLC36A4	941
SLC18B1	940
SLC25A4	937
SLC2A8	936
SLC35D2	933
SLC34A3	914
SLC35F2	906
SLC35D1	905
SLC35G1	902
SLC37A3	900
SLC15A3	888
ABCC4	886
SLC26A11	886
SLC12A4	884
SLC29A3	877
SLC43A1	873
SLC31A2	867
SLC4A11	866
DIRC2	860
SLC16A3	860
SLC9B2	853
SLC39A3	851
SLC24A1	849
SLC6A6	845
ABCA3	822
SLC25A43	822
SLC6A18	819
SLC35G2	811
SLC22A17	810
SLC37A1	810
SLC46A1	793
SLC25A23	788
SLC25A25	784
SLC1A1	773
SLC2A12	767
ABCA7	756
SLC25A34	746
ABCB8	742
SLC44A3	729
SLC16A10	721
ABCA1	720
SLC22A4	711
SLC19A1	701
SLC48A1	697
SLC46A3	683
SLCO3A1	670
SLC27A2	655
SLC41A2	649
SLC30A3	644
SLC35G5	640
SLC12A8	631
SLC22A23	605
SLC23A2	603
SLC25A44	579
SLC16A13	560
ABCC3	541
ABCG1	535
SLC16A7	523
SLC4A3	511
SLC7A2	511
ABCC2	498
SLC16A5	496
SLC5A10	491
SLC34A1	482
SLC23A3	468
SLC52A3	457
ABCD1	447
SLC16A14	445
SLC27A3	444
SLC25A27	443
SLC24A5	441
SLC9A5	437
SLC29A2	420
SLC29A1	419
ABCA5	415
SLC7A7	411
SLC36A1	408
SLC2A10	399
SLC2A13	398
SLC9A7	394
SLC22A13	387
SLC25A45	383
SLC16A4	379
SLC6A15	375
SLC38A5	365
SLC44A5	365
SLC6A17	361
SLC40A1	359
SLC39A14	358
SLC12A6	350
SLC25A35	319
SLC9A1	314
SLC16A6	313
SLC5A11	308
SLC29A4	299
SLC25A42	297
SLC26A10	297
SLC45A3	296
SLC25A53	294
SLC39A8	292
SLC16A9	290
SLC35F3	283
SLC17A9	280
SLC6A5	279
SLC24A2	274
SLC8A1	271
SLC16A2	268
SLC1A3	257
SLCO5A1	257
ABCB1	252
ABCG2	250
SLC25A21	250
SLC45A1	248
SLCO2A1	237
SLC47A2	235
ABCB9	232
SLC18A1	228
SLC15A2	225
SLC22A15	225
SLC52A1	220
SLC43A2	217
SLC10A4	201
MFSD7	199
ABCA12	195
SLC35F1	191
SLC2A9	187
SLC47A1	186
SLC7A10	181
SLC25A47	178
SLC9B1	175
SLC24A3	174
SLC8A2	169
ABCB4	168
SLC9A2	163
SLC44A4	158
SLC17A2	157
SLC4A8	152
SLC51B	146
SLC9A9	146
SLC38A8	138
SLC22A1	131
ABCA13	126
SLC16A8	126
SLC19A3	121
SLC9A3	121
SLC25A18	118
SLC38A11	117
SLC2A5	116
UCP3	116
SLC2A14	114
SLC35G6	107
SLC14A1	106
SLC6A14	106
SLC7A3	106
CFTR	104
SLC10A6	99
SLC22A3	96
SLC5A4	94
SLC6A20	94
ABCC6	90
SLC51A	90
SLCO2B1	90
ABCA6	88
SLC5A9	88
SLC27A1	86
SLC16A12	84
SLC8A3	84
SLC7A9	82
SLC18A2	81
SLC35D3	80
SLCO1B1	80
SLC25A30	78
SLC28A3	78
SLC11A1	77
ABCC8	76
SLC7A14	76
SLC34A2	72
SLC3A1	72
SLC38A4	71
SLC7A8	70
SLC35F4	69
SLC35G3	69
SLC6A9	69
SLC25A41	67
SLC45A2	67
ABCC9	65
RHCG	64
SLC10A7	63
SLC22A16	63
SLC27A6	60
SLC5A1	60
SLC13A3	59
SLC6A2	59
SLC17A4	58
ABCA4	57
SLC6A16	57
SLC4A4	56
SLCO4C1	56
SLC24A4	55
SLC39A2	54
SLC22A24	53
SLC1A2	51
SLC17A3	50
SLCO6A1	50
SLC1A6	49
SLC22A2	48
SLC37A2	48
SLC26A4	46
SLC38A3	45
SLC6A12	45
SLCO1A2	45
ABCG8	44
SLC28A2	41
SLC17A8	40
RHAG	39
SLC15A1	39
SLC17A7	39
SLC23A1	39
SLC9C1	39
SLC1A7	38
SLC30A8	38
ABCA8	36
SLC6A4	36
ABCG5	35
SLC13A4	35
SLC26A3	35
ABCA10	34
SLC26A9	33
SLC25A48	32
SLC5A5	31
SLC17A6	30
SLC22A11	30
SLC2A7	30
SLC32A1	30
SLC6A13	30
SLC6A19	28
ABCC11	26
SLC16A11	26
SLC22A20	24
SLC2A2	24
SLC30A10	24
SLC6A7	23
ABCB5	22
ABCD2	22
SLC17A1	21
SLC30A2	21
SLC5A8	21
SLC26A8	18
SLC10A5	17
SLC12A3	17
SLC4A1	17
SLC14A2	16
SLC7A4	16
SLC5A12	15
SLC6A3	15
SLC4A10	14
SLC4A9	13
SLC22A8	12
SLC30A4	12
UCP1	12
SLC22A7	11
SLC39A12	11
ABCA9	10
RHBG	10
SLC13A2	9
SLC22A10	9
SLC22A9	9
ABCA2	8
SLC22A12	8
SLC5A2	8
SLC28A1	7
SLCO1C1	7
SLC10A2	6
SLC12A1	6
ABCB11	4
ABCC13	4
SLC10A1	4
SLC22A25	4
SLC6A1	4
SLC6A11	4
SLC7A13	4
SLC13A1	3
SLC26A1	3
SLC26A7	3
SLC36A3	3
SLC5A7	3
SLC12A5	2
SLC13A5	2
SLC25A31	2
SLC36A2	2
ABCG4	1
SLC25A2	1
SLC26A5	1
SLC2A4	1
SLC46A2	1
SLC9C2	1
ABCC12	0
SLC22A14	0
SLC22A6	0

## Sheet: Median-Max Expression
Transporter	Median Expression	Max. Expression	Cell Line of Max.Exp.	Cosmic ID	Tissue
SLC25A5	11.9954	12.9148	TE-10	753622	aero-digestive tract
SLC26A3	2.8069	12.6255	HT55	907287	digestive system
SLC25A3	11.7606	12.5407	ACHN	905950	kidney
SLC44A1	9.54715	12.4594	MV-4-11	908156	blood
SLC38A1	10.4794	12.4069	OVCAR-4	905990	urogenital system
SLC20A1	9.59122	12.3424	HD-MY-Z	907050	blood
SLC25A6	10.4895	12.2975	ROS-50	1331025	blood
SLC39A6	8.52598	12.2939	HCC1500	1303900	breast
SLC17A3	3.20017	11.9032	VA-ES-BJ	688121	soft tissue
SLC25A37	7.05498	11.8782	KU812	907311	blood
SLC38A11	3.1386	11.7489	DMS-53	907295	lung
SLC35B1	9.01888	11.5387	HCC202	1290906	breast
SLC35E3	6.98661	11.5062	DK-MG	906839	nervous system
SLC24A5	3.41545	11.4845	MZ7-mel	753596	skin
SLC3A2	8.50481	11.4652	NCI-H292	753604	lung
SLC10A4	2.99379	11.4521	KP-N-YN	907314	nervous system
RHAG	3.13773	11.359	KU812	907311	blood
SLC7A7	3.38333	11.3254	C2BBe1	910700	digestive system
SLC26A2	6.40927	11.315	WM278	1240226	skin
SLC16A6	3.2884	11.2796	SK-MEL-5	905956	skin
SLC27A2	5.06722	11.1626	Mo-T	908149	blood
SLC2A1	6.94366	11.1074	ESO26	1503366	aero-digestive tract
ABCB10	7.4358	11.0543	KU812	907311	blood
CFTR	3.12366	11.0104	ALL-SIL	1295740	blood
TAP1	7.66865	10.9931	CRO-AP2	906807	blood
SLC8A3	3.01103	10.9622	HuO9	907072	bone
SLC1A5	7.2215	10.9388	LK-2	687787	lung
ABCB7	8.85733	10.917	COLO-320-HSR	910569	digestive system
SLC25A39	8.99019	10.8442	KYSE-450	907320	aero-digestive tract
SLC16A1	8.39374	10.8409	AGS	906790	digestive system
ABCB1	3.13308	10.8268	HAL-01	949153	blood
SLC16A4	3.10444	10.8063	VA-ES-BJ	688121	soft tissue
SLC25A36	8.47842	10.7769	HCC1500	1303900	breast
SLC4A7	7.56	10.7451	Hs746T	1240151	digestive system
ABCC2	3.5014	10.7389	huH-1	1298146	digestive system
SLC7A2	3.56706	10.7293	ECC12	906849	digestive system
SLC38A2	6.20211	10.7037	SBC-5	713880	lung
SLC41A1	7.01453	10.6875	KARPAS-1106P	1327773	blood
SLC15A4	7.80191	10.6448	CESS	910688	blood
SLC36A4	6.14168	10.6058	NCI-H1836	1240182	lung
SLC35F4	2.97907	10.5988	NCI-H82	688031	lung
SLC30A8	2.97211	10.566	RPMI-2650	909700	aero-digestive tract
ABCF1	8.42764	10.5296	SU-DHL-1	909742	blood
SLC14A1	2.89155	10.5145	YKG-1	687592	nervous system
SLC22A18	6.44342	10.4471	G-MEL	1240130	skin
SLC2A12	3.93131	10.4369	NCI-H1836	1240182	lung
ABCA12	3.12272	10.4031	HCC1428	1290905	breast
SLC43A1	4.78427	10.3822	KARPAS-422	907274	blood
SLC12A2	5.06269	10.3472	LS-513	907795	digestive system
SLC24A3	2.86081	10.3375	EW-7	949160	bone
SLC39A4	6.60083	10.3298	NCI-H1435	1298347	lung
SLC13A4	3.15184	10.3239	D-283MED	906834	nervous system
ABCA6	2.91802	10.3187	NUGC-4	1298357	digestive system
SLC35F5	6.3921	10.3122	OVISE	1240198	urogenital system
SLC7A11	6.48706	10.2681	NCI-H647	1240191	lung
SLC40A1	3.12954	10.265	CMK	910566	blood
SLC35G2	6.5606	10.193	ECC12	906849	digestive system
SLC30A1	6.13655	10.1919	EMC-BAC-2	1503370	lung
SLC22A1	3.10795	10.1877	KM-H2	909976	blood
SLC6A8	6.49455	10.1867	ESO26	1503366	aero-digestive tract
SLC45A2	3.18682	10.17	MZ7-mel	753596	skin
SLC38A9	6.59112	10.1633	JEG-3	907176	urogenital system
SLC35D2	6.72627	10.1618	HuH-7	907071	digestive system
SLC50A1	6.50022	10.1558	UACC-812	910910	breast
SLC1A1	3.94132	10.1477	NUGC-4	1298357	digestive system
SLC18A1	3.3429	10.1431	KELLY	753618	nervous system
SLC35F3	2.94211	10.1369	HDLM-2	924110	blood
SLC1A6	2.88846	10.1278	MDA-MB-468	908123	breast
SLCO3A1	4.14989	10.1096	DU-4475	906844	breast
SLC12A8	3.85196	10.1023	H2369	1290808	lung
SLC31A1	6.91662	10.0831	G-MEL	1240130	skin
SLC25A18	3.16708	10.0467	huH-1	1298146	digestive system
SLC27A5	6.29848	9.96133	TE-15	753614	aero-digestive tract
SLC7A5	5.78331	9.94393	NCI-H292	753604	lung
SLC35D3	2.93575	9.91529	NCI-H146	910899	lung
SLC25A19	6.70905	9.83838	Farage	1297449	blood
SLC44A2	5.61035	9.8098	MDA-MB-468	908123	breast
SLC25A4	5.73979	9.80308	SK-MEL-1	909723	skin
SLC25A46	7.44429	9.79987	CPC-N	753547	lung
SLC25A21	3.12045	9.78716	DU-145	905935	urogenital system
SLC35A1	7.327	9.78071	NUGC-4	1298357	digestive system
SLC51B	3.25511	9.77707	NCI-H1944	1240185	lung
MTCH2	8.05745	9.77467	LU-134-A	753588	lung
SLC25A13	6.69037	9.73878	NB(TU)1-10	1240181	nervous system
SLC34A2	2.93273	9.72864	RMG-I	909699	urogenital system
SLC5A6	4.94435	9.72162	ES4	949156	bone
ABCA10	2.8727	9.71736	NUGC-4	1298357	digestive system
SLC7A9	3.001	9.715	huH-1	1298146	digestive system
SLC25A40	7.07948	9.71381	NOMO-1	908451	blood
SLC44A4	3.20244	9.70887	NUGC-4	1298357	digestive system
SLC25A20	5.44192	9.7029	OPM-2	909249	blood
SLC25A38	7.61117	9.68696	MOLT-16	908147	blood
SLC6A14	3.13429	9.65694	COR-L105	906805	lung
SLC38A5	3.25635	9.6562	A3-KAW	910935	blood
SLC19A2	4.9528	9.61817	MZ7-mel	753596	skin
SLC5A8	2.94217	9.6008	HCC1500	1303900	breast
SLC44A3	4.37463	9.58749	HT55	907287	digestive system
MTCH1	7.83308	9.57962	U-698-M	909777	blood
SLC6A20	3.20996	9.54575	CL-40	1240124	digestive system
SLC7A3	2.92377	9.51275	NTERA-S-cl-D1	908454	urogenital system
SLC16A3	5.38891	9.48702	CAKI-1	905963	kidney
SLC26A4	2.90919	9.48692	SK-MEL-3	909724	skin
SLC17A8	3.11798	9.48019	ES4	949156	bone
SLC39A7	7.03079	9.47646	MG-63	908131	bone
SLC25A28	6.62308	9.45872	SK-UT-1	909732	soft tissue
SLC30A9	7.38679	9.45812	KYSE-150	907317	aero-digestive tract
UCP2	5.11228	9.44457	MDA-MB-134-VI	908119	breast
ABCC4	4.41042	9.43557	CMK	910566	blood
SLC17A6	2.97042	9.42831	NCI-H378	688022	lung
SLC16A14	3.35472	9.41935	201T	1287381	lung
SLC22A4	4.11737	9.39764	PL-21	1330991	blood
SLC35B2	6.35005	9.34769	UMC-11	909779	lung
SLC33A1	6.9705	9.3398	RPMI-8226	905964	blood
SLC5A4	3.19516	9.31316	UACC-257	905977	skin
SLC16A12	2.68114	9.30417	SNU-449	909738	digestive system
SLC6A15	3.2402	9.27869	SK-N-DZ	688086	nervous system
ABCG2	3.17327	9.27556	HT-1376	907066	urogenital system
SLC39A5	3.92969	9.24069	HuH-7	907071	digestive system
SLC25A10	5.89426	9.232	HCC2157	749715	breast
SLC25A27	3.42761	9.22571	SU-DHL-6	1331037	blood
SLC12A7	5.34162	9.21357	OACp4C	1503362	aero-digestive tract
SLC47A2	3.29712	9.1958	TE-15	753614	aero-digestive tract
SLC1A4	4.56152	9.19393	IGR-37	1240153	skin
SLC17A1	3.05699	9.17591	RCC-JF	1524415	kidney
SLC25A16	5.71143	9.16731	ZR-75-30	909907	breast
SLC3A1	3.07611	9.14724	NUGC-4	1298357	digestive system
ABCC5	5.61049	9.10851	RERF-LC-Sq1	1298538	lung
SLC19A3	3.01501	9.0777	JHH-7	1240160	digestive system
SLC20A2	4.95479	9.06652	NCI-H1693	687802	lung
SLC9B2	3.97846	9.04744	HH	907056	blood
SLC18A2	3.22652	9.04603	NCI-H1436	908469	lung
RHCG	3.16095	9.03834	BB30-HNC	753531	aero-digestive tract
ABCE1	7.14324	9.0118	NCI-SNU-5	908445	digestive system
SLC38A4	3.04235	8.99587	SK-PN-DW	909731	bone
ABCC3	3.8058	8.98307	KYAE-1	1503368	aero-digestive tract
SLC31A2	4.23663	8.96066	BB30-HNC	753531	aero-digestive tract
SLC39A11	5.10249	8.94777	GAK	910932	skin
SLC39A13	5.83075	8.91749	BCPAP	924104	thyroid
SLC4A11	3.91312	8.91475	OVKATE	1240199	urogenital system
SLC25A32	6.63305	8.90006	BV-173	910710	blood
SLC26A10	3.25962	8.89371	RH-18	971774	soft tissue
SLC28A2	3.06943	8.89206	RMG-I	909699	urogenital system
SLC39A1	6.2958	8.85622	NCI-H3122	1240190	lung
SLC27A4	6.19797	8.84519	RKO	909698	digestive system
SLC25A15	5.22787	8.83751	OAW-42	910548	urogenital system
SLC45A4	4.37424	8.83589	NEC8	910942	urogenital system
ABCG1	3.63582	8.80622	NCI-H727	724855	lung
SLC35G1	4.2419	8.79914	LC-1-sq	1298223	lung
SLC17A5	5.89694	8.76884	RCC-MF	1524419	kidney
ABCB4	3.06202	8.75551	SK-MEL-24	909725	skin
SLC25A26	6.19928	8.7546	COLO-320-HSR	910569	digestive system
SLC6A2	3.16903	8.74725	SK-N-SH	717431	nervous system
SLC25A17	6.20363	8.74479	HCC202	1290906	breast
SLC2A5	3.08327	8.74301	Daudi	906831	blood
ABCA5	3.35506	8.72907	CPC-N	753547	lung
SLC27A3	3.44625	8.72434	G-361	906865	skin
ABCC1	6.1952	8.72214	LC-1F	907785	lung
SLC35A5	6.58598	8.71595	NCI-H209	688013	lung
SLC41A3	6.79736	8.71488	IGR-37	1240153	skin
SLC37A4	5.98416	8.71459	NUGC-4	1298357	digestive system
SLC10A3	5.16453	8.70201	CAL-78	1290765	bone
SLC38A6	5.31377	8.67934	KS-1	907313	nervous system
SLC46A3	4.31878	8.67824	COLO-205	905961	digestive system
SLC25A1	6.35134	8.6712	EFM-192A	1290798	breast
SLC25A11	6.51893	8.67062	NCI-H1105	908468	lung
SLC15A3	3.94941	8.6673	SLVL	1331032	blood
SLC35C1	4.07309	8.62958	NCI-H1944	1240185	lung
ABCD3	6.17304	8.59093	COLO-824	906812	breast
SLC2A6	5.04174	8.57338	L-428	907322	blood
SLCO5A1	3.34284	8.57015	EW-7	949160	bone
SLC10A2	3.02016	8.56822	RMG-I	909699	urogenital system
SLC30A7	6.44654	8.56484	RERF-LC-KJ	1298537	lung
SLC2A8	5.40154	8.52851	HT55	907287	digestive system
SLC35B4	5.74439	8.51345	A101D	910921	skin
FLVCR1	5.27871	8.50054	201T	1287381	lung
SLCO4A1	4.80852	8.48776	ESO51	1503367	aero-digestive tract
SLC12A3	2.90356	8.48231	OVISE	1240198	urogenital system
SLC26A11	5.08362	8.46547	JHOS-4	1480359	urogenital system
SLC1A7	3.15858	8.42342	D-283MED	906834	nervous system
ABCA13	3.01121	8.41194	JHU-011	1240161	aero-digestive tract
ABCC10	4.99273	8.38051	YAPC	909904	pancreas
SLC48A1	3.6769	8.37939	KLE	924187	urogenital system
SLC22A3	2.804	8.378	LNCaP-Clone-FGC	907788	urogenital system
SLC7A14	3.00875	8.37353	OVK-18	1480371	urogenital system
SLC35F2	5.16989	8.34831	SF268	905986	nervous system
SLC2A2	3.08799	8.33985	huH-1	1298146	digestive system
SLC35F1	3.19239	8.33033	DMS-79	753551	lung
SLC2A10	3.23421	8.32989	HCC1419	907045	breast
SLC5A11	3.35653	8.31515	H-EMC-SS	907290	bone
SLC9A6	5.66678	8.26782	H-EMC-SS	907290	bone
SLC16A9	3.13802	8.2624	MOLM-16	1330948	blood
SLC22A9	2.96022	8.23248	HuH-7	907071	digestive system
SLC7A6	5.09516	8.20537	SiHa	930297	urogenital system
SLC25A29	4.77539	8.19787	BT-483	949093	breast
SLC2A14	3.16838	8.19099	NEC8	910942	urogenital system
SLC35C2	6.17649	8.18237	G-MEL	1240130	skin
SLC4A2	5.16391	8.18089	G-MEL	1240130	skin
SLC5A1	3.01213	8.17502	ESO26	1503366	aero-digestive tract
SLC22A16	3.19817	8.1748	THP-1	909771	blood
SLC37A1	4.18148	8.16816	HEL	907053	blood
SLC1A2	3.10288	8.16326	SNU-C1	910905	digestive system
SLC52A2	5.84322	8.16031	NCI-H1435	1298347	lung
SLC1A3	3.25502	8.11742	TE-1	753621	aero-digestive tract
SLC7A4	2.98705	8.11739	SCH	909711	digestive system
SLC25A24	6.21585	8.11132	SCaBER	1299051	urogenital system
SLC27A6	2.9327	8.10107	NCI-H2085	687812	lung
SLC2A9	3.05714	8.06734	THP-1	909771	blood
SLC4A1	3.12391	8.038	KU812	907311	blood
SLC35A3	4.74171	8.0034	KYSE-180	907318	aero-digestive tract
ABCA3	3.99746	7.97897	TC-YIK	946357	urogenital system
ABCC11	3.0997	7.96532	MDA-MB-453	908122	breast
SLC22A17	3.76903	7.95537	42-MG-BA	687561	nervous system
SLC16A10	3.74565	7.95347	NEC8	910942	urogenital system
ABCA1	3.9902	7.94968	CHSA0108	1290768	bone
ABCC9	2.86384	7.94862	VA-ES-BJ	688121	soft tissue
SLC23A3	3.48167	7.93127	NUGC-4	1298357	digestive system
SLC5A7	2.81489	7.90558	SK-N-FI	688087	nervous system
SLC16A7	3.53689	7.90294	NUGC-4	1298357	digestive system
SLC26A6	5.2138	7.89813	ESO26	1503366	aero-digestive tract
SLC25A12	5.33014	7.89212	TUR	909773	blood
SLC7A1	5.47564	7.88704	DOK	910936	aero-digestive tract
ABCF2	6.05851	7.8245	KMS-12-BM	907281	blood
SLC11A2	5.67748	7.81003	NCI-H2342	687819	lung
ABCA4	3.10794	7.80171	RPMI-2650	909700	aero-digestive tract
ABCG5	2.98597	7.74534	HuH-7	907071	digestive system
ABCA8	2.95873	7.71867	KYM-1	1240166	soft tissue
SLCO1A2	2.95581	7.67201	VA-ES-BJ	688121	soft tissue
SLC35E2	4.51958	7.64335	KELLY	753618	nervous system
SLC30A5	6.02185	7.64086	GAMG	906868	nervous system
SLC18B1	4.60492	7.64063	UACC-257	905977	skin
SLC29A4	3.39189	7.63549	TC-YIK	946357	urogenital system
SLC30A3	3.57872	7.62368	ES4	949156	bone
SLC35B3	5.68305	7.58732	ES4	949156	bone
SLC4A4	2.8508	7.5705	RPMI-2650	909700	aero-digestive tract
SLC39A10	4.7709	7.56709	NCI-H838	910399	lung
SLC28A3	3.03485	7.50943	SCH	909711	digestive system
SLC22A23	3.6266	7.47223	G-MEL	1240130	skin
SLC6A19	3.14675	7.45597	GP5d	907291	digestive system
SLC24A1	3.86574	7.45368	TYK-nu	909774	urogenital system
SLCO2B1	3.13891	7.43003	C2BBe1	910700	digestive system
SLC17A4	3.23339	7.40845	VCaP	1299075	urogenital system
SLC30A2	3.09268	7.34242	LB647-SCLC	753582	lung
SLC52A1	3.33743	7.34162	PCI-38	1240205	aero-digestive tract
SLC26A9	3.06823	7.33984	TUR	909773	blood
SLC9A2	3.00263	7.32778	CL-34	1290771	digestive system
SLC6A16	3.00578	7.29081	KARPAS-422	907274	blood
SLC38A10	5.20474	7.27228	A4-Fuk	910934	blood
SLC22A2	3.25096	7.2631	CAL-54	910952	kidney
SLC17A9	3.13255	7.26096	ME-1	1330942	blood
SLC39A2	3.0557	7.2399	ME-180	687514	urogenital system
SLC39A12	2.89647	7.22391	C32	906830	skin
SLC35A2	4.88784	7.16483	SUP-M2	1331040	blood
SLC9C1	3.13498	7.10681	RPMI-2650	909700	aero-digestive tract
SLC14A2	3.0334	7.05958	OAW-28	946360	urogenital system
SLC7A10	3.3042	7.05803	MKN7	924250	digestive system
SLC29A3	3.96797	7.05536	JHU-022	1240162	aero-digestive tract
SLC25A48	3.0188	6.96396	RERF-GC-1B	1240209	digestive system
SLC39A9	3.94409	6.96362	DG-75	906838	blood
SLC44A5	3.2259	6.94961	TOV-21G	1240222	urogenital system
SLC45A1	3.32141	6.94305	OACM5-1	1503363	aero-digestive tract
SLC35D1	4.10985	6.88633	DB	906832	blood
SLC12A9	4.38939	6.80585	JAR	907175	urogenital system
SLCO4C1	2.91989	6.80385	SIG-M5	909715	blood
SLC25A43	4.74268	6.78548	BT-20	906801	breast
SLC41A2	3.74403	6.76823	NUGC-4	1298357	digestive system
SLC9A5	3.44941	6.74245	EB-3	906847	blood
SLC16A8	3.20948	6.73099	COLO-792	906814	skin
SLC22A15	3.12285	6.71587	NB4	1323913	blood
SLC16A11	3.09755	6.71121	ES1	949158	bone
SLC17A2	3.29932	6.68889	C3A	910850	digestive system
SLC15A2	3.15376	6.65708	KP-2	1298218	pancreas
SLC39A3	3.79701	6.6484	CMK	910566	blood
SLC16A5	3.50231	6.64529	JHH-1	1298151	digestive system
SLC9A7	3.33933	6.60938	UACC-812	910910	breast
DIRC2	4.29401	6.60094	HN	907059	aero-digestive tract
SLC16A2	3.01004	6.59525	KGN	924186	urogenital system
SLC6A4	3.06841	6.57249	SNU-C1	910905	digestive system
SLC28A1	3.04507	6.56574	RCC10RGB	909974	kidney
SLC25A14	4.48912	6.56255	NCI-H2227	688018	lung
SLC7A8	3.02894	6.5503	RMG-I	909699	urogenital system
SLCO2A1	3.34889	6.5225	HT-1197	907065	urogenital system
SLC46A1	3.76542	6.51766	C2BBe1	910700	digestive system
ABCC6	3.07162	6.50275	HuH-7	907071	digestive system
SLC47A1	3.16062	6.5	huH-1	1298146	digestive system
SLCO1C1	2.92281	6.49947	JHH-7	1240160	digestive system
SLC8A1	3.22917	6.4945	G-401	907299	kidney
SLC9A9	3.09225	6.4903	MM1S	1659818	blood
SLC39A8	3.28299	6.43182	MES-SA	908127	urogenital system
SLCO1B1	2.82758	6.42812	SW1573	724878	lung
ABCC8	3.16428	6.42106	TT	930299	thyroid
SLC37A3	4.11327	6.41618	C32	906830	skin
SLC22A5	4.14523	6.4097	UACC-812	910910	breast
SLC12A6	3.38606	6.36099	KON	1298215	aero-digestive tract
SLC15A1	3.13674	6.33543	NUGC-4	1298357	digestive system
SLC4A8	3.17034	6.32616	CHP-126	910567	nervous system
SLC25A34	3.63166	6.30351	NCI-H2196	908481	lung
SLC5A9	3.28761	6.20287	NEC8	910942	urogenital system
SLC13A3	3.1117	6.14952	CP50-MEL-B	753545	skin
SLC9B1	3.2895	6.1399	HH	907056	blood
SLC4A3	3.51447	6.1344	WM793B	1299081	skin
SLC38A3	3.11434	6.12665	FU97	1290806	digestive system
SLC19A1	3.69076	6.11514	MONO-MAC-6	908148	blood
SLC25A22	4.46522	6.09655	BHT-101	906696	thyroid
SLC35A4	4.64536	6.08618	VMRC-LCD	713869	lung
SLC30A6	4.22834	6.02779	TE-1	753621	aero-digestive tract
SLC30A4	3.04012	5.99763	KARPAS-1106P	1327773	blood
SLC51A	3.25203	5.98977	REH	909696	blood
SLC6A6	3.76918	5.97752	RERF-LC-KJ	1298537	lung
SLC30A10	3.13251	5.93245	FU97	1290806	digestive system
SLC38A8	3.21963	5.9299	GAK	910932	skin
SLC5A10	3.49978	5.92821	D-263MG	946368	nervous system
ABCD2	2.74865	5.92405	TOV-112D	1299070	urogenital system
SLC6A12	3.18699	5.92298	IGR-1	907169	skin
SLC25A25	3.70081	5.91764	LoVo	907790	digestive system
SLC23A2	3.55572	5.9123	KYM-1	1240166	soft tissue
SLC13A5	2.91585	5.88477	HuH-7	907071	digestive system
SLC24A4	3.18535	5.88366	MZ7-mel	753596	skin
SLC7A13	2.87406	5.78481	HCC1419	907045	breast
ABCB5	2.96149	5.74292	MZ7-mel	753596	skin
SLCO6A1	3.00042	5.71221	COLO-680N	906817	aero-digestive tract
SLC34A3	3.83714	5.69531	LNCaP-Clone-FGC	907788	urogenital system
SLC23A1	2.92909	5.68751	A549	905949	lung
SLC9A8	4.06987	5.68451	RL	910861	blood
SLC25A23	3.77046	5.63044	MEC-1	1330943	blood
SLC25A42	3.3802	5.62127	HuH-7	907071	digestive system
SLC2A13	3.40783	5.60781	TASK1	1299067	nervous system
SLC22A7	3.17287	5.60755	HuH-7	907071	digestive system
SLC12A4	3.82002	5.59024	SiHa	930297	urogenital system
ABCD4	4.11214	5.56072	CML-T1	910951	blood
SLC25A53	3.40197	5.49904	NCI-H1092	687997	lung
SLC29A2	3.40413	5.47988	BT-474	946359	breast
SLC6A13	3.14821	5.47004	YT	946358	blood
MFSD7	3.2921	5.46544	T47D	905945	breast
SLC32A1	3.13218	5.39396	NCI-H1436	908469	lung
SLC26A8	2.97618	5.39323	PL-21	1330991	blood
UCP1	2.94866	5.37382	SCH	909711	digestive system
SLC52A3	3.47473	5.34743	SNU-C1	910905	digestive system
UCP3	3.27888	5.28534	HDLM-2	924110	blood
SLC37A2	2.94998	5.22352	SK-MEL-3	909724	skin
SLC13A2	3.06395	5.1526	SCC-4	910904	aero-digestive tract
SLC27A1	3.19942	5.15216	G-MEL	1240130	skin
ABCD1	3.46964	5.08835	IGR-1	907169	skin
SLC12A1	2.89519	5.08567	HCC1599	749713	breast
ABCA7	3.70767	5.04503	SU-DHL-6	1331037	blood
SLC38A7	3.86082	5.01213	G-MEL	1240130	skin
SLC25A31	2.84586	4.98844	NEC8	910942	urogenital system
SLC25A47	3.34386	4.98412	C3A	910850	digestive system
SLC6A18	3.70386	4.96026	Daudi	906831	blood
SLC22A11	3.14249	4.95832	MKN28	908139	digestive system
SLC43A2	3.32508	4.91981	KMS-12-BM	907281	blood
SLC4A10	2.97064	4.90427	SBC-3	753610	lung
SLC35G5	3.60957	4.89471	ML-2	908141	blood
SLC24A2	3.37793	4.88772	CADO-ES1	753539	bone
SLC5A5	3.10993	4.86553	MRK-nu-1	908151	breast
SLC25A30	3.03873	4.84223	SUP-B15	1247871	blood
SLC39A14	3.38159	4.82861	VA-ES-BJ	688121	soft tissue
SLC22A20	3.15345	4.76875	PA-TU-8902	1298526	pancreas
ABCA9	2.99845	4.75444	NUGC-4	1298357	digestive system
SLC16A13	3.53294	4.72486	ETK-1	906861	digestive system
SLC45A3	3.39179	4.72398	VCaP	1299075	urogenital system
SLC6A3	3.02922	4.71738	A704	910920	kidney
SLC6A1	3.0342	4.62639	huH-1	1298146	digestive system
ABCG8	3.1043	4.60406	HuH-7	907071	digestive system
RHBG	3.02255	4.58465	HuH-7	907071	digestive system
SLC22A13	3.44149	4.57943	RC-K8	1330995	blood
SLC17A7	3.14653	4.55346	SK-PN-DW	909731	bone
ABCB8	3.59932	4.54488	G-MEL	1240130	skin
SLC29A1	3.45755	4.50771	KYM-1	1240166	soft tissue
SLC25A45	3.43008	4.50709	RF-48	909697	digestive system
SLC6A5	3.39208	4.43397	SIMA	753620	nervous system
SLC36A1	3.46828	4.41761	JAR	907175	urogenital system
SLC26A7	2.82237	4.41095	KURAMOCHI	909975	urogenital system
ABCC13	2.82582	4.38557	HCC1428	1290905	breast
SLC25A35	3.4062	4.35828	MIA-PaCa-2	724870	pancreas
SLC34A1	3.49552	4.35736	HEL	907053	blood
SLC6A7	3.17424	4.35494	SW1463	909748	digestive system
SLC6A17	3.44289	4.34423	SH-4	909713	skin
SLC25A44	3.5339	4.34193	NCI-H345	688021	lung
SLC25A41	3.13326	4.31669	NB12	949172	nervous system
SLC5A12	2.91258	4.29401	OV-90	1240197	urogenital system
SLC10A6	3.20237	4.29261	KASUMI-1	907275	blood
SLC9A1	3.38597	4.28639	NCI-SNU-16	908446	digestive system
SLC22A10	3.15446	4.26246	huH-1	1298146	digestive system
SLC9A3	3.21712	4.2034	KARPAS-45	907272	blood
SLC35G3	3.16642	4.16639	Daudi	906831	blood
ABCB9	3.40165	4.11189	MOLP-8	1330950	blood
SLC2A7	3.06772	4.08167	Calu-3	687777	lung
ABCB11	2.97884	4.08085	huH-1	1298146	digestive system
SLC35G6	3.21795	4.06492	OV-90	1240197	urogenital system
SLC6A9	3.23635	4.06265	LoVo	907790	digestive system
SLC10A1	2.92807	4.04155	C2BBe1	910700	digestive system
SLC8A2	3.35808	4.0094	Daudi	906831	blood
SLC10A7	3.15792	3.99613	EB2	906846	blood
SLC22A12	2.98733	3.98365	Raji	909262	blood
SLC11A1	3.29089	3.97209	MOLM-13	1330947	blood
SLC4A9	3.06242	3.92841	Daudi	906831	blood
SLC5A2	2.95447	3.91208	DU-4475	906844	breast
SLC22A24	3.27211	3.78076	D-542MG	753549	nervous system
SLC36A2	2.99363	3.77762	HuO9	907072	bone
SLC10A5	3.04315	3.73286	HCC1419	907045	breast
SLC13A1	3.00748	3.7186	YT	946358	blood
SLC6A11	3.03141	3.67838	HCC38	749717	breast
SLC22A8	3.16004	3.67586	Daudi	906831	blood
ABCA2	3.04623	3.66167	VCaP	1299075	urogenital system
SLC2A4	3.0577	3.64555	KU812	907311	blood
SLC26A1	2.94781	3.58205	PANC-10-05	925348	pancreas
SLC26A5	3.04433	3.58108	NCI-H1417	688001	lung
SLC36A3	3.1395	3.56069	HCC2157	749715	breast
SLC12A5	3.13417	3.55869	Daudi	906831	blood
SLC25A2	2.89926	3.55728	PF-382	909260	blood
ABCG4	2.90179	3.55415	RO82-W-1	930083	thyroid
SLC22A25	3.09255	3.55292	DB	906832	blood
SLC9C2	3.01847	3.52798	SK-N-AS	724828	nervous system
SLC46A2	2.95326	3.51279	NCI-H2009	724873	lung
ABCC12	2.81437	3.43739	WIL2-NS	1331049	blood
SLC22A14	2.93324	3.39818	UMC-11	909779	lung
SLC22A6	2.91324	3.36845	KYSE-180	907318	aero-digestive tract

## Sheet: Average Tissue Expression
Tissue	#cells	Transporter	Average Expression	Z-score
aero-digestive tract	80	ABCA1	4.4875	0.135591
aero-digestive tract	80	ABCA10	3.013	0.192231
aero-digestive tract	80	ABCA12	3.99462	1.05308
aero-digestive tract	80	ABCA13	3.83068	2.79975
aero-digestive tract	80	ABCA2	3.03896	-0.411659
aero-digestive tract	80	ABCA3	3.76604	-1.45613
aero-digestive tract	80	ABCA4	3.16255	0.295301
aero-digestive tract	80	ABCA5	3.5095	-0.0864612
aero-digestive tract	80	ABCA6	2.93092	-0.670558
aero-digestive tract	80	ABCA7	3.78066	0.530181
aero-digestive tract	80	ABCA8	2.9487	-0.782984
aero-digestive tract	80	ABCA9	2.98487	-0.907445
aero-digestive tract	80	ABCB1	3.08146	-0.894224
aero-digestive tract	80	ABCB10	7.20539	-0.537745
aero-digestive tract	80	ABCB11	2.96981	-0.48334
aero-digestive tract	80	ABCB4	2.99879	-0.843984
aero-digestive tract	80	ABCB5	2.93998	-0.437546
aero-digestive tract	80	ABCB7	8.67956	-0.339221
aero-digestive tract	80	ABCB8	3.54351	-1.15613
aero-digestive tract	80	ABCB9	3.38596	-0.767154
aero-digestive tract	80	ABCC1	6.64699	1.64841
aero-digestive tract	80	ABCC10	5.4039	1.66626
aero-digestive tract	80	ABCC11	3.10585	-0.249634
aero-digestive tract	80	ABCC12	2.80155	-0.778987
aero-digestive tract	80	ABCC13	2.81616	-0.55302
aero-digestive tract	80	ABCC2	3.94237	-0.0944641
aero-digestive tract	80	ABCC3	5.06251	0.452004
aero-digestive tract	80	ABCC4	4.42357	-0.298698
aero-digestive tract	80	ABCC5	6.32885	1.72832
aero-digestive tract	80	ABCC6	3.08048	-0.611397
aero-digestive tract	80	ABCC8	3.1871	-0.335134
aero-digestive tract	80	ABCC9	2.92461	-0.654861
aero-digestive tract	80	ABCD1	3.5083	-0.114705
aero-digestive tract	80	ABCD2	2.72433	-0.680056
aero-digestive tract	80	ABCD3	6.18082	0.0230476
aero-digestive tract	80	ABCD4	4.1958	0.888901
aero-digestive tract	80	ABCE1	6.92224	-0.834602
aero-digestive tract	80	ABCF1	8.37074	0.100051
aero-digestive tract	80	ABCF2	5.73425	-1.69633
aero-digestive tract	80	ABCG1	4.71887	0.934307
aero-digestive tract	80	ABCG2	3.56049	0.625932
aero-digestive tract	80	ABCG4	2.92633	0.456022
aero-digestive tract	80	ABCG5	2.9614	-0.543511
aero-digestive tract	80	ABCG8	3.11563	-0.171407
aero-digestive tract	80	CFTR	3.19447	-0.347047
aero-digestive tract	80	DIRC2	5.05661	1.72303
aero-digestive tract	80	FLVCR1	5.1628	0.0768277
aero-digestive tract	80	MFSD7	3.26617	-0.568752
aero-digestive tract	80	MTCH1	7.87754	-0.0224048
aero-digestive tract	80	MTCH2	7.84437	-1.22904
aero-digestive tract	80	RHAG	3.12285	-0.406601
aero-digestive tract	80	RHBG	3.03021	-0.198424
aero-digestive tract	80	RHCG	3.58854	3.01916
aero-digestive tract	80	SLC10A1	2.93066	-0.0665692
aero-digestive tract	80	SLC10A2	3.02996	-0.123417
aero-digestive tract	80	SLC10A3	5.56571	0.937192
aero-digestive tract	80	SLC10A4	3.12548	-0.428461
aero-digestive tract	80	SLC10A5	3.09141	1.22794
aero-digestive tract	80	SLC10A6	3.21144	-0.0230794
aero-digestive tract	80	SLC10A7	3.14553	-0.362422
aero-digestive tract	80	SLC11A1	3.27202	-0.439787
aero-digestive tract	80	SLC11A2	5.69644	-0.230722
aero-digestive tract	80	SLC12A1	2.88246	-0.504771
aero-digestive tract	80	SLC12A2	5.31645	0.0550015
aero-digestive tract	80	SLC12A3	2.91313	-0.150674
aero-digestive tract	80	SLC12A4	3.97018	0.571943
aero-digestive tract	80	SLC12A5	3.11073	-1.16721
aero-digestive tract	80	SLC12A6	3.83486	1.92518
aero-digestive tract	80	SLC12A7	5.41002	0.0994541
aero-digestive tract	80	SLC12A8	4.46242	0.767602
aero-digestive tract	80	SLC12A9	4.47908	-0.0704496
aero-digestive tract	80	SLC13A1	2.98674	-0.908382
aero-digestive tract	80	SLC13A2	3.10423	1.02408
aero-digestive tract	80	SLC13A3	3.16561	0.0585375
aero-digestive tract	80	SLC13A4	3.15021	-0.762537
aero-digestive tract	80	SLC13A5	2.9139	-0.471578
aero-digestive tract	80	SLC14A1	2.86674	-1.2495
aero-digestive tract	80	SLC14A2	3.01104	-0.605582
aero-digestive tract	80	SLC15A1	3.17542	-0.00865219
aero-digestive tract	80	SLC15A2	3.81471	2.08849
aero-digestive tract	80	SLC15A3	4.75437	1.33992
aero-digestive tract	80	SLC15A4	7.52483	-0.768057
aero-digestive tract	80	SLC16A1	8.55444	0.702373
aero-digestive tract	80	SLC16A10	3.70597	-0.795182
aero-digestive tract	80	SLC16A11	3.08545	-0.446968
aero-digestive tract	80	SLC16A12	3.25207	0.587192
aero-digestive tract	80	SLC16A13	3.59337	0.727915
aero-digestive tract	80	SLC16A14	4.72496	1.05332
aero-digestive tract	80	SLC16A2	3.70991	0.984591
aero-digestive tract	80	SLC16A3	5.86417	0.178116
aero-digestive tract	80	SLC16A4	3.30812	-1.1292
aero-digestive tract	80	SLC16A5	3.86348	1.03029
aero-digestive tract	80	SLC16A6	3.21781	-0.642836
aero-digestive tract	80	SLC16A7	3.57073	-0.660777
aero-digestive tract	80	SLC16A8	3.20946	-0.674076
aero-digestive tract	80	SLC16A9	3.3092	-0.490775
aero-digestive tract	80	SLC17A1	3.03409	-0.477983
aero-digestive tract	80	SLC17A2	3.27798	-0.971708
aero-digestive tract	80	SLC17A3	3.16947	-0.509359
aero-digestive tract	80	SLC17A4	3.18102	-1.07687
aero-digestive tract	80	SLC17A5	5.72374	-1.13867
aero-digestive tract	80	SLC17A6	2.93833	-0.832874
aero-digestive tract	80	SLC17A7	3.11706	-0.797437
aero-digestive tract	80	SLC17A8	3.07893	-0.56408
aero-digestive tract	80	SLC17A9	3.25189	-0.343574
aero-digestive tract	80	SLC18A1	3.3438	-0.535675
aero-digestive tract	80	SLC18A2	3.23795	-0.397335
aero-digestive tract	80	SLC18B1	4.70557	0.0389206
aero-digestive tract	80	SLC19A1	3.50486	-1.55758
aero-digestive tract	80	SLC19A2	4.68245	-0.748224
aero-digestive tract	80	SLC19A3	3.07657	-0.66084
aero-digestive tract	80	SLC1A1	4.04198	-1.08584
aero-digestive tract	80	SLC1A2	3.0937	-0.737969
aero-digestive tract	80	SLC1A3	4.06741	2.63952
aero-digestive tract	80	SLC1A4	4.65925	-0.18753
aero-digestive tract	80	SLC1A5	7.25785	0.177435
aero-digestive tract	80	SLC1A6	3.01693	-0.122347
aero-digestive tract	80	SLC1A7	3.16206	-0.868363
aero-digestive tract	80	SLC20A1	9.16358	-1.22541
aero-digestive tract	80	SLC20A2	5.82825	1.41389
aero-digestive tract	80	SLC22A1	3.29575	0.92429
aero-digestive tract	80	SLC22A10	3.1428	-0.571376
aero-digestive tract	80	SLC22A11	3.15464	-0.148297
aero-digestive tract	80	SLC22A12	2.96487	-0.601291
aero-digestive tract	80	SLC22A13	3.49056	1.03908
aero-digestive tract	80	SLC22A14	2.94417	0.261095
aero-digestive tract	80	SLC22A15	3.46013	1.33541
aero-digestive tract	80	SLC22A16	3.20796	-0.221064
aero-digestive tract	80	SLC22A17	3.81553	-0.579994
aero-digestive tract	80	SLC22A18	6.91544	0.382851
aero-digestive tract	80	SLC22A2	3.25413	-0.293327
aero-digestive tract	80	SLC22A20	3.18698	0.329486
aero-digestive tract	80	SLC22A23	4.09721	1.24933
aero-digestive tract	80	SLC22A24	3.24453	-0.79684
aero-digestive tract	80	SLC22A25	3.09356	-0.0284416
aero-digestive tract	80	SLC22A3	3.03696	0.188301
aero-digestive tract	80	SLC22A4	4.89485	0.339434
aero-digestive tract	80	SLC22A5	4.29462	0.332749
aero-digestive tract	80	SLC22A6	2.89443	-0.765883
aero-digestive tract	80	SLC22A7	3.18029	-0.0809539
aero-digestive tract	80	SLC22A8	3.16041	-0.280602
aero-digestive tract	80	SLC22A9	2.9468	-0.570315
aero-digestive tract	80	SLC23A1	2.9157	-0.459271
aero-digestive tract	80	SLC23A2	3.54848	-0.510493
aero-digestive tract	80	SLC23A3	3.55609	0.309357
aero-digestive tract	80	SLC24A1	3.9234	-0.319045
aero-digestive tract	80	SLC24A2	3.36973	-1.05171
aero-digestive tract	80	SLC24A3	3.11173	-0.474706
aero-digestive tract	80	SLC24A4	3.2001	-0.32051
aero-digestive tract	80	SLC24A5	3.17915	-0.604408
aero-digestive tract	80	SLC25A1	6.32797	-0.33133
aero-digestive tract	80	SLC25A10	5.87365	-0.0348043
aero-digestive tract	80	SLC25A11	6.48802	0.0985208
aero-digestive tract	80	SLC25A12	5.31607	0.0778208
aero-digestive tract	80	SLC25A13	6.55556	-0.082932
aero-digestive tract	80	SLC25A14	4.432	-1.08677
aero-digestive tract	80	SLC25A15	5.0994	-0.867247
aero-digestive tract	80	SLC25A16	5.66911	-0.449795
aero-digestive tract	80	SLC25A17	6.27056	0.299615
aero-digestive tract	80	SLC25A18	3.37833	0.738836
aero-digestive tract	80	SLC25A19	6.15682	-0.463528
aero-digestive tract	80	SLC25A2	2.8843	-0.611355
aero-digestive tract	80	SLC25A20	4.59208	-1.6252
aero-digestive tract	80	SLC25A21	3.65307	1.38992
aero-digestive tract	80	SLC25A22	4.53887	-0.114527
aero-digestive tract	80	SLC25A23	3.75158	-0.882804
aero-digestive tract	80	SLC25A24	6.33884	0.381215
aero-digestive tract	80	SLC25A25	3.79691	0.542969
aero-digestive tract	80	SLC25A26	6.04331	-0.798879
aero-digestive tract	80	SLC25A27	3.68397	0.345127
aero-digestive tract	80	SLC25A28	7.14124	2.14204
aero-digestive tract	80	SLC25A29	4.79669	-0.228137
aero-digestive tract	80	SLC25A3	11.641	-0.695666
aero-digestive tract	80	SLC25A30	2.96364	-1.07826
aero-digestive tract	80	SLC25A31	2.8039	-2.25398
aero-digestive tract	80	SLC25A32	6.67474	0.13824
aero-digestive tract	80	SLC25A34	3.59435	-1.45819
aero-digestive tract	80	SLC25A35	3.47046	0.628408
aero-digestive tract	80	SLC25A36	8.57817	0.850155
aero-digestive tract	80	SLC25A37	6.99496	-0.492415
aero-digestive tract	80	SLC25A38	7.19682	-0.928213
aero-digestive tract	80	SLC25A39	9.0015	0.245512
aero-digestive tract	80	SLC25A4	5.41412	-0.515999
aero-digestive tract	80	SLC25A40	6.76383	-0.606911
aero-digestive tract	80	SLC25A41	3.14283	-0.195778
aero-digestive tract	80	SLC25A42	3.31994	-0.727754
aero-digestive tract	80	SLC25A43	5.27159	1.60571
aero-digestive tract	80	SLC25A44	3.49712	-0.509705
aero-digestive tract	80	SLC25A45	3.39483	-0.361579
aero-digestive tract	80	SLC25A46	7.16647	-0.66094
aero-digestive tract	80	SLC25A47	3.37048	0.422976
aero-digestive tract	80	SLC25A48	3.08476	0.842277
aero-digestive tract	80	SLC25A5	12.0348	0.760499
aero-digestive tract	80	SLC25A53	3.3668	-0.657002
aero-digestive tract	80	SLC25A6	9.9592	-1.50952
aero-digestive tract	80	SLC26A1	2.94291	-0.380906
aero-digestive tract	80	SLC26A10	3.24609	-0.725195
aero-digestive tract	80	SLC26A11	4.74877	-0.544915
aero-digestive tract	80	SLC26A2	6.17947	-0.648815
aero-digestive tract	80	SLC26A3	2.7922	-0.471811
aero-digestive tract	80	SLC26A4	2.86914	-0.656005
aero-digestive tract	80	SLC26A5	3.03403	-0.343113
aero-digestive tract	80	SLC26A6	5.14406	-0.496735
aero-digestive tract	80	SLC26A7	2.81761	-0.868897
aero-digestive tract	80	SLC26A8	2.98292	-0.275707
aero-digestive tract	80	SLC26A9	3.0683	-0.496737
aero-digestive tract	80	SLC27A1	3.20025	-0.714904
aero-digestive tract	80	SLC27A2	5.72196	0.588379
aero-digestive tract	80	SLC27A3	3.7158	0.442122
aero-digestive tract	80	SLC27A4	6.19139	-0.0728352
aero-digestive tract	80	SLC27A5	5.81681	-0.249574
aero-digestive tract	80	SLC27A6	2.93414	-0.828769
aero-digestive tract	80	SLC28A1	3.05036	-0.293739
aero-digestive tract	80	SLC28A2	3.06603	-0.608322
aero-digestive tract	80	SLC28A3	3.37577	1.75516
aero-digestive tract	80	SLC29A1	3.39368	-0.740487
aero-digestive tract	80	SLC29A2	3.55444	0.385952
aero-digestive tract	80	SLC29A3	4.58807	1.8094
aero-digestive tract	80	SLC29A4	3.37184	-1.03535
aero-digestive tract	80	SLC2A1	8.1102	1.24877
aero-digestive tract	80	SLC2A10	3.41719	-0.951939
aero-digestive tract	80	SLC2A12	5.68319	1.79931
aero-digestive tract	80	SLC2A13	3.29295	-1.58672
aero-digestive tract	80	SLC2A14	3.32231	0.637169
aero-digestive tract	80	SLC2A2	3.08543	-0.393827
aero-digestive tract	80	SLC2A4	3.03426	-0.968372
aero-digestive tract	80	SLC2A5	3.11225	-0.262913
aero-digestive tract	80	SLC2A6	5.38389	0.725946
aero-digestive tract	80	SLC2A7	3.05515	-0.566865
aero-digestive tract	80	SLC2A8	5.80174	0.967991
aero-digestive tract	80	SLC2A9	4.60756	2.97524
aero-digestive tract	80	SLC30A1	6.20767	0.148628
aero-digestive tract	80	SLC30A10	3.12739	-0.254394
aero-digestive tract	80	SLC30A2	3.05467	-1.64448
aero-digestive tract	80	SLC30A3	3.69019	-0.0488601
aero-digestive tract	80	SLC30A4	3.03493	-0.47029
aero-digestive tract	80	SLC30A5	5.83801	-2.04972
aero-digestive tract	80	SLC30A6	4.28444	0.621444
aero-digestive tract	80	SLC30A7	6.50792	0.304384
aero-digestive tract	80	SLC30A8	3.07517	0.823446
aero-digestive tract	80	SLC30A9	6.98835	-2.48097
aero-digestive tract	80	SLC31A1	7.23991	0.458166
aero-digestive tract	80	SLC31A2	5.69867	2.67959
aero-digestive tract	80	SLC32A1	3.14726	0.181361
aero-digestive tract	80	SLC33A1	7.30765	1.61832
aero-digestive tract	80	SLC34A1	3.50216	0.0456296
aero-digestive tract	80	SLC34A2	2.95641	-0.668917
aero-digestive tract	80	SLC34A3	3.88587	0.264375
aero-digestive tract	80	SLC35A1	6.96528	-1.20004
aero-digestive tract	80	SLC35A2	4.93877	-0.188813
aero-digestive tract	80	SLC35A3	5.06919	0.945516
aero-digestive tract	80	SLC35A4	4.5044	-1.29853
aero-digestive tract	80	SLC35A5	6.52855	0.0619628
aero-digestive tract	80	SLC35B1	9.01425	-0.057247
aero-digestive tract	80	SLC35B2	6.18749	-0.739984
aero-digestive tract	80	SLC35B3	5.51968	-0.977438
aero-digestive tract	80	SLC35B4	4.78463	-1.45692
aero-digestive tract	80	SLC35C1	4.19423	-0.205725
aero-digestive tract	80	SLC35C2	6.23503	-0.0744964
aero-digestive tract	80	SLC35D1	4.06099	-0.283436
aero-digestive tract	80	SLC35D2	7.11273	0.601934
aero-digestive tract	80	SLC35D3	2.9842	-0.36765
aero-digestive tract	80	SLC35E2	4.31557	-1.1327
aero-digestive tract	80	SLC35E3	6.91065	-0.410335
aero-digestive tract	80	SLC35F1	3.15275	-0.726635
aero-digestive tract	80	SLC35F2	5.15723	0.281835
aero-digestive tract	80	SLC35F3	3.54966	-0.1944
aero-digestive tract	80	SLC35F4	2.9179	-1.29359
aero-digestive tract	80	SLC35F5	6.60969	0.270764
aero-digestive tract	80	SLC35G1	4.61217	0.69962
aero-digestive tract	80	SLC35G2	5.15412	-0.96125
aero-digestive tract	80	SLC35G3	3.1567	-0.723447
aero-digestive tract	80	SLC35G5	3.53561	-0.934678
aero-digestive tract	80	SLC35G6	3.20536	-0.677761
aero-digestive tract	80	SLC36A1	3.55169	1.905
aero-digestive tract	80	SLC36A2	2.9995	-0.163133
aero-digestive tract	80	SLC36A3	3.15565	0.403985
aero-digestive tract	80	SLC36A4	5.39328	-1.23904
aero-digestive tract	80	SLC37A1	4.25909	-0.0561872
aero-digestive tract	80	SLC37A2	3.12426	0.760024
aero-digestive tract	80	SLC37A3	3.93344	-1.04832
aero-digestive tract	80	SLC37A4	5.64568	-1.00274
aero-digestive tract	80	SLC38A1	10.244	0.313339
aero-digestive tract	80	SLC38A10	5.24574	0.151955
aero-digestive tract	80	SLC38A11	3.22395	-0.306077
aero-digestive tract	80	SLC38A2	6.90555	1.26997
aero-digestive tract	80	SLC38A3	3.11675	-0.463174
aero-digestive tract	80	SLC38A4	3.16234	0.0592664
aero-digestive tract	80	SLC38A5	4.10217	0.446941
aero-digestive tract	80	SLC38A6	5.56471	0.00776608
aero-digestive tract	80	SLC38A7	3.87776	-0.196364
aero-digestive tract	80	SLC38A8	3.19548	-0.797556
aero-digestive tract	80	SLC38A9	6.63281	0.454302
aero-digestive tract	80	SLC39A1	6.42723	0.256434
aero-digestive tract	80	SLC39A10	4.61663	-1.13455
aero-digestive tract	80	SLC39A11	5.37256	0.26155
aero-digestive tract	80	SLC39A12	2.8862	-0.418407
aero-digestive tract	80	SLC39A13	5.79488	-0.710317
aero-digestive tract	80	SLC39A14	3.39753	-0.444099
aero-digestive tract	80	SLC39A2	3.55656	2.70679
aero-digestive tract	80	SLC39A3	3.66594	-0.925793
aero-digestive tract	80	SLC39A4	7.18727	1.20962
aero-digestive tract	80	SLC39A5	3.90471	-0.442719
aero-digestive tract	80	SLC39A6	8.37598	-0.518532
aero-digestive tract	80	SLC39A7	6.97804	-0.501758
aero-digestive tract	80	SLC39A8	3.20174	-0.743043
aero-digestive tract	80	SLC39A9	4.10831	0.866521
aero-digestive tract	80	SLC3A1	3.056	-0.627885
aero-digestive tract	80	SLC3A2	9.31034	2.33102
aero-digestive tract	80	SLC40A1	3.54194	-0.359197
aero-digestive tract	80	SLC41A1	6.90336	-0.413447
aero-digestive tract	80	SLC41A2	3.65889	-0.561894
aero-digestive tract	80	SLC41A3	7.00021	0.706742
aero-digestive tract	80	SLC43A1	4.14761	-1.07389
aero-digestive tract	80	SLC43A2	3.34956	0.0131678
aero-digestive tract	80	SLC44A1	9.99658	1.63279
aero-digestive tract	80	SLC44A2	6.21428	1.01476
aero-digestive tract	80	SLC44A3	5.46683	0.658982
aero-digestive tract	80	SLC44A4	3.65591	0.137234
aero-digestive tract	80	SLC44A5	3.90555	1.81132
aero-digestive tract	80	SLC45A1	3.31454	-0.767906
aero-digestive tract	80	SLC45A2	3.16887	-0.306003
aero-digestive tract	80	SLC45A3	3.40442	-0.280543
aero-digestive tract	80	SLC45A4	4.85439	0.627817
aero-digestive tract	80	SLC46A1	3.877	0.462522
aero-digestive tract	80	SLC46A2	2.97986	0.668363
aero-digestive tract	80	SLC46A3	3.83555	-1.30322
aero-digestive tract	80	SLC47A1	3.26432	-0.437343
aero-digestive tract	80	SLC47A2	4.62916	3.09893
aero-digestive tract	80	SLC48A1	3.94946	0.636601
aero-digestive tract	80	SLC4A1	3.13214	-0.193936
aero-digestive tract	80	SLC4A10	2.95391	-0.824701
aero-digestive tract	80	SLC4A11	4.39231	0.727794
aero-digestive tract	80	SLC4A2	4.56748	-1.58805
aero-digestive tract	80	SLC4A3	3.68368	-0.0434176
aero-digestive tract	80	SLC4A4	2.88535	-0.393606
aero-digestive tract	80	SLC4A7	7.3433	-0.789388
aero-digestive tract	80	SLC4A8	3.12599	-0.887709
aero-digestive tract	80	SLC4A9	3.06125	-0.588448
aero-digestive tract	80	SLC50A1	6.89552	1.01123
aero-digestive tract	80	SLC51A	3.30212	0.762055
aero-digestive tract	80	SLC51B	3.23559	-0.572026
aero-digestive tract	80	SLC52A1	4.53147	3.24129
aero-digestive tract	80	SLC52A2	5.97224	0.119507
aero-digestive tract	80	SLC52A3	3.8148	1.04628
aero-digestive tract	80	SLC5A1	3.21351	0.378122
aero-digestive tract	80	SLC5A10	3.55173	0.398473
aero-digestive tract	80	SLC5A11	3.38519	-0.0287111
aero-digestive tract	80	SLC5A12	3.00138	1.94307
aero-digestive tract	80	SLC5A2	2.94755	-0.510681
aero-digestive tract	80	SLC5A4	3.14374	-0.410717
aero-digestive tract	80	SLC5A5	3.1589	0.60821
aero-digestive tract	80	SLC5A6	4.67222	-0.80282
aero-digestive tract	80	SLC5A7	2.80523	-0.527522
aero-digestive tract	80	SLC5A8	2.94623	-0.342383
aero-digestive tract	80	SLC5A9	3.30233	-0.28104
aero-digestive tract	80	SLC6A1	3.02783	-1.14565
aero-digestive tract	80	SLC6A11	3.06808	0.90781
aero-digestive tract	80	SLC6A12	3.21195	-0.0644741
aero-digestive tract	80	SLC6A13	3.13407	-0.629698
aero-digestive tract	80	SLC6A14	3.45137	0.196145
aero-digestive tract	80	SLC6A15	4.10379	-0.112138
aero-digestive tract	80	SLC6A16	2.99957	-0.535231
aero-digestive tract	80	SLC6A17	3.42546	-0.707346
aero-digestive tract	80	SLC6A18	3.66472	-0.740124
aero-digestive tract	80	SLC6A19	3.18542	0.203257
aero-digestive tract	80	SLC6A2	3.34844	0.440594
aero-digestive tract	80	SLC6A20	3.28802	-0.148868
aero-digestive tract	80	SLC6A3	3.03243	-0.177552
aero-digestive tract	80	SLC6A4	3.04514	-0.710191
aero-digestive tract	80	SLC6A5	3.41616	0.0731441
aero-digestive tract	80	SLC6A6	3.75677	-0.532468
aero-digestive tract	80	SLC6A7	3.18579	0.139243
aero-digestive tract	80	SLC6A8	6.87503	0.245966
aero-digestive tract	80	SLC6A9	3.31504	0.920819
aero-digestive tract	80	SLC7A1	5.74815	1.50317
aero-digestive tract	80	SLC7A10	3.34155	-0.291923
aero-digestive tract	80	SLC7A11	6.93804	1.18161
aero-digestive tract	80	SLC7A13	2.88503	-0.132012
aero-digestive tract	80	SLC7A14	3.01021	-0.700881
aero-digestive tract	80	SLC7A2	3.60235	-1.70123
aero-digestive tract	80	SLC7A3	2.97321	-0.583881
aero-digestive tract	80	SLC7A4	3.02089	0.19497
aero-digestive tract	80	SLC7A5	6.9471	2.52017
aero-digestive tract	80	SLC7A6	5.11506	0.129169
aero-digestive tract	80	SLC7A7	3.45982	-0.9162
aero-digestive tract	80	SLC7A8	3.28201	1.56975
aero-digestive tract	80	SLC7A9	3.11627	0.105811
aero-digestive tract	80	SLC8A1	3.32561	-0.453441
aero-digestive tract	80	SLC8A2	3.38398	0.412972
aero-digestive tract	80	SLC8A3	3.03573	-0.555224
aero-digestive tract	80	SLC9A1	3.57181	1.8075
aero-digestive tract	80	SLC9A2	3.23834	0.189282
aero-digestive tract	80	SLC9A3	3.2009	-0.648176
aero-digestive tract	80	SLC9A5	3.40931	-1.23347
aero-digestive tract	80	SLC9A6	5.69274	0.08571
aero-digestive tract	80	SLC9A7	3.4643	-0.379979
aero-digestive tract	80	SLC9A8	4.19207	0.763365
aero-digestive tract	80	SLC9A9	3.19733	-0.0880555
aero-digestive tract	80	SLC9B1	3.24934	-0.840313
aero-digestive tract	80	SLC9B2	3.79118	-0.817144
aero-digestive tract	80	SLC9C1	3.21738	1.16801
aero-digestive tract	80	SLC9C2	3.00868	-0.441168
aero-digestive tract	80	SLCO1A2	3.11915	1.31056
aero-digestive tract	80	SLCO1B1	2.97441	0.712595
aero-digestive tract	80	SLCO1C1	2.9304	-0.525215
aero-digestive tract	80	SLCO2A1	3.49913	1.0158
aero-digestive tract	80	SLCO2B1	3.16768	-0.366994
aero-digestive tract	80	SLCO3A1	5.28014	2.09244
aero-digestive tract	80	SLCO4A1	4.96126	-0.21475
aero-digestive tract	80	SLCO4C1	2.89028	-0.622547
aero-digestive tract	80	SLCO5A1	3.27496	-0.741948
aero-digestive tract	80	SLCO6A1	3.10219	1.66525
aero-digestive tract	80	TAP1	7.92927	0.816953
aero-digestive tract	80	UCP1	2.95538	-0.308891
aero-digestive tract	80	UCP2	4.69934	-0.976076
aero-digestive tract	80	UCP3	3.24559	-0.570004
blood	168	ABCA1	4.15867	-0.604896
blood	168	ABCA10	2.94909	-0.155545
blood	168	ABCA12	3.30562	-0.393587
blood	168	ABCA13	3.30683	0.437049
blood	168	ABCA2	3.11784	2.26064
blood	168	ABCA3	4.10823	-0.557187
blood	168	ABCA4	3.18806	0.660579
blood	168	ABCA5	3.34784	-0.605531
blood	168	ABCA6	3.46487	1.6205
blood	168	ABCA7	4.01837	1.99223
blood	168	ABCA8	3.03698	0.124391
blood	168	ABCA9	3.08105	2.16676
blood	168	ABCB1	3.78278	0.0192751
blood	168	ABCB10	8.27849	2.66125
blood	168	ABCB11	3.07253	2.7965
blood	168	ABCB4	3.79321	1.23363
blood	168	ABCB5	3.01596	0.0759223
blood	168	ABCB7	9.3086	2.26829
blood	168	ABCB8	3.71625	2.30391
blood	168	ABCB9	3.48136	1.87577
blood	168	ABCC1	6.30551	0.383858
blood	168	ABCC10	4.90869	-0.647023
blood	168	ABCC11	3.20939	0.284293
blood	168	ABCC12	2.878	1.82099
blood	168	ABCC13	2.88436	1.48312
blood	168	ABCC2	3.57633	-0.838194
blood	168	ABCC3	3.16795	-1.5431
blood	168	ABCC4	4.65945	0.23314
blood	168	ABCC5	5.4026	-0.864706
blood	168	ABCC6	3.1396	-0.0757257
blood	168	ABCC8	3.24958	0.484676
blood	168	ABCC9	3.00574	-0.320917
blood	168	ABCD1	3.53897	0.163491
blood	168	ABCD2	3.0433	3.10289
blood	168	ABCD3	5.8849	-1.46268
blood	168	ABCD4	4.32023	2.19188
blood	168	ABCE1	7.59443	2.62406
blood	168	ABCF1	8.59096	1.34756
blood	168	ABCF2	6.22908	0.796349
blood	168	ABCG1	4.51475	0.56657
blood	168	ABCG2	3.28788	-0.673364
blood	168	ABCG4	2.96614	1.62889
blood	168	ABCG5	3.04891	-0.0647518
blood	168	ABCG8	3.20101	1.91075
blood	168	CFTR	3.38092	0.0934516
blood	168	DIRC2	3.41578	-2.52886
blood	168	FLVCR1	5.58979	1.35989
blood	168	MFSD7	3.42076	1.17169
blood	168	MTCH1	7.42304	-2.68839
blood	168	MTCH2	7.80826	-1.43888
blood	168	RHAG	3.70797	3.25318
blood	168	RHBG	3.0786	0.911832
blood	168	RHCG	3.20854	-0.15889
blood	168	SLC10A1	3.05263	2.83728
blood	168	SLC10A2	3.12702	2.58596
blood	168	SLC10A3	4.91808	-0.999492
blood	168	SLC10A4	3.24468	-0.223651
blood	168	SLC10A5	3.11184	1.71106
blood	168	SLC10A6	3.34548	3.00779
blood	168	SLC10A7	3.3826	2.63144
blood	168	SLC11A1	3.41796	3.01052
blood	168	SLC11A2	5.5058	-1.78445
blood	168	SLC12A1	2.96014	1.19972
blood	168	SLC12A2	5.08007	-0.315168
blood	168	SLC12A3	3.00392	2.12994
blood	168	SLC12A4	3.72175	-1.91091
blood	168	SLC12A5	3.20725	2.08686
blood	168	SLC12A6	3.65734	0.864171
blood	168	SLC12A7	4.86918	-1.19356
blood	168	SLC12A8	3.8737	-0.895952
blood	168	SLC12A9	4.48234	-0.046764
blood	168	SLC13A1	3.07192	2.56496
blood	168	SLC13A2	3.12827	1.79995
blood	168	SLC13A3	3.18347	0.288113
blood	168	SLC13A4	3.30193	2.08243
blood	168	SLC13A5	2.96833	1.59769
blood	168	SLC14A1	3.0569	-0.764008
blood	168	SLC14A2	3.20213	2.89811
blood	168	SLC15A1	3.1824	0.0854822
blood	168	SLC15A2	3.71926	1.71441
blood	168	SLC15A3	4.77748	1.42904
blood	168	SLC15A4	8.19684	0.776692
blood	168	SLC16A1	8.43223	0.487745
blood	168	SLC16A10	4.35272	1.81428
blood	168	SLC16A11	3.16529	0.0753051
blood	168	SLC16A12	2.66547	-0.710537
blood	168	SLC16A13	3.63139	1.38896
blood	168	SLC16A14	3.87178	-0.242462
blood	168	SLC16A2	2.95045	-1.25671
blood	168	SLC16A3	4.74154	-1.23353
blood	168	SLC16A4	3.17489	-1.2535
blood	168	SLC16A5	3.42396	-0.962613
blood	168	SLC16A6	4.10339	0.354608
blood	168	SLC16A7	4.08776	1.68052
blood	168	SLC16A8	3.33989	2.31815
blood	168	SLC16A9	3.32669	-0.367656
blood	168	SLC17A1	3.1105	-0.139824
blood	168	SLC17A2	3.4163	2.28557
blood	168	SLC17A3	3.27733	-0.153084
blood	168	SLC17A4	3.36491	2.30222
blood	168	SLC17A5	5.50863	-1.86401
blood	168	SLC17A6	3.04531	0.119734
blood	168	SLC17A7	3.20603	0.179974
blood	168	SLC17A8	3.23157	0.355303
blood	168	SLC17A9	4.17172	2.69607
blood	168	SLC18A1	3.40609	-0.188297
blood	168	SLC18A2	3.56119	2.05254
blood	168	SLC18B1	4.34955	-1.04321
blood	168	SLC19A1	4.06251	2.32281
blood	168	SLC19A2	4.90418	-0.29971
blood	168	SLC19A3	3.06114	-0.766231
blood	168	SLC1A1	4.03275	-1.1083
blood	168	SLC1A2	3.11793	-0.472462
blood	168	SLC1A3	3.26951	-0.909984
blood	168	SLC1A4	5.58465	1.13185
blood	168	SLC1A5	7.35398	0.590282
blood	168	SLC1A6	2.93418	-0.556778
blood	168	SLC1A7	3.22238	0.108715
blood	168	SLC20A1	9.43252	-0.543501
blood	168	SLC20A2	4.5598	-1.33709
blood	168	SLC22A1	3.28551	0.828545
blood	168	SLC22A10	3.23967	2.60047
blood	168	SLC22A11	3.2174	1.07946
blood	168	SLC22A12	3.08524	2.41579
blood	168	SLC22A13	3.50938	1.69105
blood	168	SLC22A14	2.9961	2.11091
blood	168	SLC22A15	3.44446	1.20586
blood	168	SLC22A16	3.868	3.30128
blood	168	SLC22A17	3.70045	-1.02803
blood	168	SLC22A18	5.46673	-1.37123
blood	168	SLC22A2	3.33783	0.966973
blood	168	SLC22A20	3.24636	1.22339
blood	168	SLC22A23	3.56722	-0.818199
blood	168	SLC22A24	3.34079	2.68399
blood	168	SLC22A25	3.16747	2.55521
blood	168	SLC22A3	2.81773	-0.731793
blood	168	SLC22A4	4.24697	-1.16966
blood	168	SLC22A5	3.96572	-1.09552
blood	168	SLC22A6	2.98195	2.71566
blood	168	SLC22A7	3.24638	1.87952
blood	168	SLC22A8	3.23175	2.35875
blood	168	SLC22A9	3.06378	1.09378
blood	168	SLC23A1	3.21543	2.70259
blood	168	SLC23A2	3.79032	0.477297
blood	168	SLC23A3	3.61516	0.828723
blood	168	SLC24A1	3.86112	-0.759021
blood	168	SLC24A2	3.48029	1.72704
blood	168	SLC24A3	3.13701	-0.450251
blood	168	SLC24A4	3.31922	1.32712
blood	168	SLC24A5	3.55198	-0.282781
blood	168	SLC25A1	5.95388	-1.82178
blood	168	SLC25A10	5.55604	-0.707681
blood	168	SLC25A11	6.33699	-0.51434
blood	168	SLC25A12	5.98872	2.61509
blood	168	SLC25A13	5.95866	-1.2207
blood	168	SLC25A14	4.59303	0.380464
blood	168	SLC25A15	5.49493	1.09487
blood	168	SLC25A16	5.80415	0.0779198
blood	168	SLC25A17	6.2907	0.397789
blood	168	SLC25A18	3.29428	0.0913163
blood	168	SLC25A19	7.79195	2.50917
blood	168	SLC25A2	2.9577	1.49441
blood	168	SLC25A20	6.42202	2.30291
blood	168	SLC25A21	3.30794	-0.261737
blood	168	SLC25A22	4.4381	-1.05557
blood	168	SLC25A23	3.97394	1.40798
blood	168	SLC25A24	5.05642	-2.76775
blood	168	SLC25A25	3.74719	0.0891534
blood	168	SLC25A26	6.49846	1.43052
blood	168	SLC25A27	3.64553	0.174367
blood	168	SLC25A28	6.83053	0.956667
blood	168	SLC25A29	4.67985	-0.62742
blood	168	SLC25A3	11.7399	0.270582
blood	168	SLC25A30	3.18658	0.658843
blood	168	SLC25A31	2.88967	1.09153
blood	168	SLC25A32	6.99503	1.25418
blood	168	SLC25A34	3.75434	1.89467
blood	168	SLC25A35	3.46808	0.586051
blood	168	SLC25A36	8.68576	1.38959
blood	168	SLC25A37	7.17062	-0.109343
blood	168	SLC25A38	8.34166	2.48857
blood	168	SLC25A39	8.69739	-0.932888
blood	168	SLC25A4	5.37603	-0.604656
blood	168	SLC25A40	7.84744	2.56581
blood	168	SLC25A41	3.27363	2.67074
blood	168	SLC25A42	3.87889	2.92374
blood	168	SLC25A43	4.28366	-1.09218
blood	168	SLC25A44	3.64805	1.49941
blood	168	SLC25A45	3.654	2.51983
blood	168	SLC25A46	8.02073	2.45306
blood	168	SLC25A47	3.48458	2.71094
blood	168	SLC25A48	3.10772	1.40079
blood	168	SLC25A5	12.0558	0.865204
blood	168	SLC25A53	3.62847	2.43261
blood	168	SLC25A6	10.7702	1.46778
blood	168	SLC26A1	3.02226	1.99769
blood	168	SLC26A10	3.29799	-0.628551
blood	168	SLC26A11	4.10281	-1.73776
blood	168	SLC26A2	6.12171	-0.729325
blood	168	SLC26A3	2.87862	-0.18491
blood	168	SLC26A4	3.19663	0.802071
blood	168	SLC26A5	3.10977	2.64643
blood	168	SLC26A6	5.37128	0.289313
blood	168	SLC26A7	2.85164	0.849459
blood	168	SLC26A8	3.15565	2.73864
blood	168	SLC26A9	3.22129	1.72752
blood	168	SLC27A1	3.21477	-0.558212
blood	168	SLC27A2	5.69409	0.568324
blood	168	SLC27A3	3.46099	-0.40147
blood	168	SLC27A4	5.97749	-1.05398
blood	168	SLC27A5	7.09394	2.01256
blood	168	SLC27A6	3.07587	0.423839
blood	168	SLC28A1	3.09951	0.395371
blood	168	SLC28A2	3.18701	0.962541
blood	168	SLC28A3	3.20567	0.288908
blood	168	SLC29A1	3.70668	2.09617
blood	168	SLC29A2	3.4646	-0.0149307
blood	168	SLC29A3	4.11871	0.208381
blood	168	SLC29A4	3.43721	-0.075113
blood	168	SLC2A1	6.22648	-1.11015
blood	168	SLC2A10	3.12242	-1.59642
blood	168	SLC2A12	3.6765	-1.58224
blood	168	SLC2A13	3.44121	-0.357048
blood	168	SLC2A14	3.36317	0.981814
blood	168	SLC2A2	3.16587	0.0509094
blood	168	SLC2A4	3.13313	2.3987
blood	168	SLC2A5	4.23075	3.31968
blood	168	SLC2A6	5.36565	0.656743
blood	168	SLC2A7	3.17526	1.78687
blood	168	SLC2A8	4.65156	-1.7179
blood	168	SLC2A9	3.64046	0.671127
blood	168	SLC30A1	5.80188	-0.689539
blood	168	SLC30A10	3.21305	1.76252
blood	168	SLC30A2	3.16108	1.8241
blood	168	SLC30A3	3.7319	0.145605
blood	168	SLC30A4	3.12002	1.90615
blood	168	SLC30A5	6.08596	0.188054
blood	168	SLC30A6	4.32439	1.24536
blood	168	SLC30A7	6.2892	-1.32227
blood	168	SLC30A8	3.05924	0.500316
blood	168	SLC30A9	7.23531	-0.944423
blood	168	SLC31A1	6.38893	-1.99153
blood	168	SLC31A2	3.98425	-1.29239
blood	168	SLC32A1	3.24927	2.19347
blood	168	SLC33A1	6.93074	-0.40269
blood	168	SLC34A1	3.5598	2.39346
blood	168	SLC34A2	2.99499	-0.517212
blood	168	SLC34A3	3.93223	0.94071
blood	168	SLC35A1	7.62508	1.30783
blood	168	SLC35A2	4.75219	-1.16686
blood	168	SLC35A3	4.74946	-0.287372
blood	168	SLC35A4	4.8383	1.35873
blood	168	SLC35A5	6.63745	0.530078
blood	168	SLC35B1	8.77186	-1.59113
blood	168	SLC35B2	5.91888	-1.47802
blood	168	SLC35B3	5.71882	0.174547
blood	168	SLC35B4	6.23043	0.876513
blood	168	SLC35C1	3.94936	-1.80389
blood	168	SLC35C2	6.16456	-0.416793
blood	168	SLC35D1	4.72949	2.45763
blood	168	SLC35D2	4.28828	-2.34721
blood	168	SLC35D3	2.97242	-0.43172
blood	168	SLC35E2	4.99722	1.8366
blood	168	SLC35E3	7.33939	1.34632
blood	168	SLC35F1	3.3078	-0.350341
blood	168	SLC35F2	5.26226	0.615674
blood	168	SLC35F3	3.1575	-0.877692
blood	168	SLC35F4	3.21362	1.21677
blood	168	SLC35F5	5.64312	-2.01462
blood	168	SLC35G1	4.16803	-0.837506
blood	168	SLC35G2	4.72575	-1.31997
blood	168	SLC35G3	3.27722	3.07182
blood	168	SLC35G5	3.78767	2.14014
blood	168	SLC35G6	3.23461	0.0253527
blood	168	SLC36A1	3.51577	0.947994
blood	168	SLC36A2	3.0532	1.83981
blood	168	SLC36A3	3.14809	-0.123504
blood	168	SLC36A4	5.81344	-0.331564
blood	168	SLC37A1	5.03389	1.12908
blood	168	SLC37A2	3.00043	-0.189105
blood	168	SLC37A3	3.65803	-2.06396
blood	168	SLC37A4	5.90261	-0.150108
blood	168	SLC38A1	10.4265	0.523472
blood	168	SLC38A10	5.25626	0.204242
blood	168	SLC38A11	3.18178	-0.585378
blood	168	SLC38A2	5.9309	-0.913556
blood	168	SLC38A3	3.18984	0.778125
blood	168	SLC38A4	3.05122	-0.774817
blood	168	SLC38A5	5.45791	2.77163
blood	168	SLC38A6	4.64216	-2.07036
blood	168	SLC38A7	3.85583	-0.519436
blood	168	SLC38A8	3.37334	1.98532
blood	168	SLC38A9	7.14819	2.24342
blood	168	SLC39A1	5.69929	-1.97362
blood	168	SLC39A10	4.43385	-1.79873
blood	168	SLC39A11	5.28169	0.0222567
blood	168	SLC39A12	3.01296	1.34662
blood	168	SLC39A13	5.13449	-2.01266
blood	168	SLC39A14	3.34094	-0.949936
blood	168	SLC39A2	3.05356	-0.503347
blood	168	SLC39A3	4.29794	2.76929
blood	168	SLC39A4	6.19106	-0.290908
blood	168	SLC39A5	4.02265	0.105006
blood	168	SLC39A6	8.23375	-0.866156
blood	168	SLC39A7	6.35723	-2.40971
blood	168	SLC39A8	3.77534	2.90614
blood	168	SLC39A9	4.39735	2.73022
blood	168	SLC3A1	3.15573	-0.286775
blood	168	SLC3A2	8.31731	-0.334943
blood	168	SLC40A1	3.75751	0.0135896
blood	168	SLC41A1	6.80656	-0.828457
blood	168	SLC41A2	3.65013	-0.580084
blood	168	SLC41A3	6.58434	-0.868049
blood	168	SLC43A1	6.82856	2.50431
blood	168	SLC43A2	3.50256	1.81697
blood	168	SLC44A1	9.00801	-0.889812
blood	168	SLC44A2	5.24002	-0.700304
blood	168	SLC44A3	3.49611	-1.49347
blood	168	SLC44A4	3.23161	-0.603427
blood	168	SLC44A5	3.3455	-0.416443
blood	168	SLC45A1	3.35906	-0.437587
blood	168	SLC45A2	3.27678	-0.18824
blood	168	SLC45A3	3.46519	0.384868
blood	168	SLC45A4	4.41685	-0.249939
blood	168	SLC46A1	3.55184	-1.54036
blood	168	SLC46A2	3.01151	1.90927
blood	168	SLC46A3	5.32975	1.81206
blood	168	SLC47A1	3.24251	-0.747784
blood	168	SLC47A2	3.32995	-0.491847
blood	168	SLC48A1	3.62569	-1.01705
blood	168	SLC4A1	3.20525	1.95709
blood	168	SLC4A10	3.07193	2.44382
blood	168	SLC4A11	3.96143	-0.463191
blood	168	SLC4A2	4.8441	-0.939833
blood	168	SLC4A3	3.36414	-2.01961
blood	168	SLC4A4	2.91745	-0.291066
blood	168	SLC4A7	7.6159	-0.103821
blood	168	SLC4A8	3.3026	0.202023
blood	168	SLC4A9	3.14093	1.82478
blood	168	SLC50A1	6.50943	-0.0656172
blood	168	SLC51A	3.35293	2.01261
blood	168	SLC51B	3.37101	0.133932
blood	168	SLC52A1	3.35089	-0.381134
blood	168	SLC52A2	5.5245	-1.62254
blood	168	SLC52A3	3.48307	-0.425737
blood	168	SLC5A1	3.02787	-0.348285
blood	168	SLC5A10	3.61183	1.38235
blood	168	SLC5A11	3.59783	2.36442
blood	168	SLC5A12	2.95421	0.397409
blood	168	SLC5A2	3.022	1.85597
blood	168	SLC5A4	3.2986	-0.0423631
blood	168	SLC5A5	3.1956	1.51907
blood	168	SLC5A6	5.17772	0.320956
blood	168	SLC5A7	2.8965	2.1282
blood	168	SLC5A8	3.00238	0.0570451
blood	168	SLC5A9	3.34015	0.28943
blood	168	SLC6A1	3.07453	1.30108
blood	168	SLC6A11	3.08979	1.56408
blood	168	SLC6A12	3.26107	0.908176
blood	168	SLC6A13	3.299	2.76611
blood	168	SLC6A14	3.14993	-0.656568
blood	168	SLC6A15	3.23863	-1.08359
blood	168	SLC6A16	3.29729	2.41904
blood	168	SLC6A17	3.50782	0.898692
blood	168	SLC6A18	3.83803	2.15831
blood	168	SLC6A19	3.32501	2.52384
blood	168	SLC6A2	3.20025	-0.2616
blood	168	SLC6A20	3.29035	-0.141571
blood	168	SLC6A3	3.0864	0.882633
blood	168	SLC6A4	3.18683	1.10684
blood	168	SLC6A5	3.53949	2.85192
blood	168	SLC6A6	3.85657	0.173172
blood	168	SLC6A7	3.26354	2.39271
blood	168	SLC6A8	5.29552	-2.06375
blood	168	SLC6A9	3.30219	0.720775
blood	168	SLC7A1	5.80548	1.83731
blood	168	SLC7A10	3.35307	-0.190923
blood	168	SLC7A11	6.13447	-0.998097
blood	168	SLC7A13	2.94308	1.14296
blood	168	SLC7A14	3.09783	-0.0409921
blood	168	SLC7A2	3.60776	-1.68961
blood	168	SLC7A3	3.74936	1.46677
blood	168	SLC7A4	3.04568	0.768689
blood	168	SLC7A5	5.80093	0.0732132
blood	168	SLC7A6	5.74866	2.64598
blood	168	SLC7A7	4.72226	1.06763
blood	168	SLC7A8	3.05411	-0.493121
blood	168	SLC7A9	2.99381	-0.799543
blood	168	SLC8A1	3.31665	-0.502059
blood	168	SLC8A2	3.4218	1.49637
blood	168	SLC8A3	3.36589	0.681755
blood	168	SLC9A1	3.37008	-0.564849
blood	168	SLC9A2	3.04761	-0.456503
blood	168	SLC9A3	3.39848	2.54743
blood	168	SLC9A5	3.60394	0.195668
blood	168	SLC9A6	5.75066	0.419863
blood	168	SLC9A7	3.66684	0.459086
blood	168	SLC9A8	4.22439	1.03553
blood	168	SLC9A9	3.61837	2.67071
blood	168	SLC9B1	3.48181	2.88666
blood	168	SLC9B2	4.89502	2.3814
blood	168	SLC9C1	3.29036	2.31686
blood	168	SLC9C2	3.12576	2.83624
blood	168	SLCO1A2	3.00993	-0.236915
blood	168	SLCO1B1	2.91179	0.047732
blood	168	SLCO1C1	2.94329	-0.10001
blood	168	SLCO2A1	3.38967	-0.384481
blood	168	SLCO2B1	3.26136	0.165541
blood	168	SLCO3A1	4.11484	-0.329415
blood	168	SLCO4A1	5.01523	-0.0906688
blood	168	SLCO4C1	3.14705	0.684206
blood	168	SLCO5A1	3.53986	0.192226
blood	168	SLCO6A1	3.07637	1.13892
blood	168	TAP1	8.39014	1.65191
blood	168	UCP1	3.02803	1.86435
blood	168	UCP2	6.36562	2.20817
blood	168	UCP3	3.42672	2.74914
bone	38	ABCA1	4.2223	-0.461609
bone	38	ABCA10	2.94881	-0.157069
bone	38	ABCA12	3.07256	-0.882952
bone	38	ABCA13	3.42744	0.981026
bone	38	ABCA2	3.00545	-1.54705
bone	38	ABCA3	4.33921	0.0496223
bone	38	ABCA4	3.11887	-0.330317
bone	38	ABCA5	4.25919	2.32067
bone	38	ABCA6	2.89686	-0.816694
bone	38	ABCA7	3.52748	-1.02703
bone	38	ABCA8	3.0765	0.530514
bone	38	ABCA9	2.97528	-1.2139
bone	38	ABCB1	3.26967	-0.649073
bone	38	ABCB10	7.46549	0.237626
bone	38	ABCB11	2.95938	-0.816419
bone	38	ABCB4	3.25017	-0.186555
bone	38	ABCB5	2.92924	-0.510194
bone	38	ABCB7	8.64925	-0.464865
bone	38	ABCB8	3.61413	0.258574
bone	38	ABCB9	3.41028	-0.0934421
bone	38	ABCC1	6.15304	-0.180755
bone	38	ABCC10	5.20996	0.760291
bone	38	ABCC11	3.07235	-0.422376
bone	38	ABCC12	2.80799	-0.5599
bone	38	ABCC13	2.79456	-1.1979
bone	38	ABCC2	3.35019	-1.29768
bone	38	ABCC3	3.49392	-1.19983
bone	38	ABCC4	4.3876	-0.379793
bone	38	ABCC5	5.7113	-0.000493714
bone	38	ABCC6	3.06416	-0.759284
bone	38	ABCC8	3.12337	-1.17142
bone	38	ABCC9	3.25047	0.686385
bone	38	ABCD1	3.46686	-0.490645
bone	38	ABCD2	2.73848	-0.512272
bone	38	ABCD3	6.37246	0.985275
bone	38	ABCD4	4.08673	-0.253245
bone	38	ABCE1	7.27019	0.955722
bone	38	ABCF1	8.51839	0.936443
bone	38	ABCF2	6.09291	0.110383
bone	38	ABCG1	4.1174	-0.149329
bone	38	ABCG2	3.09587	-1.5885
bone	38	ABCG4	2.86424	-1.37313
bone	38	ABCG5	2.97807	-0.452314
bone	38	ABCG8	3.11108	-0.282456
bone	38	CFTR	3.1412	-0.472909
bone	38	DIRC2	4.30887	-0.214583
bone	38	FLVCR1	4.89313	-0.733501
bone	38	MFSD7	3.29559	-0.237561
bone	38	MTCH1	7.89028	0.052294
bone	38	MTCH2	7.88703	-0.981142
bone	38	RHAG	3.11085	-0.481706
bone	38	RHBG	2.98281	-1.28579
bone	38	RHCG	3.23846	0.0913495
bone	38	SLC10A1	2.92756	-0.140312
bone	38	SLC10A2	3.0351	0.0199385
bone	38	SLC10A3	4.70828	-1.62688
bone	38	SLC10A4	3.45762	0.14222
bone	38	SLC10A5	3.05383	0.339734
bone	38	SLC10A6	3.17379	-0.874556
bone	38	SLC10A7	3.2668	1.16905
bone	38	SLC11A1	3.26596	-0.583078
bone	38	SLC11A2	5.64641	-0.638484
bone	38	SLC12A1	2.87126	-0.750637
bone	38	SLC12A2	4.58869	-1.08465
bone	38	SLC12A3	2.88078	-0.963087
bone	38	SLC12A4	3.83173	-0.811743
bone	38	SLC12A5	3.18176	1.22767
bone	38	SLC12A6	3.52153	0.0524981
bone	38	SLC12A7	5.24056	-0.305681
bone	38	SLC12A8	3.49756	-1.95881
bone	38	SLC12A9	4.37137	-0.853854
bone	38	SLC13A1	3.02251	0.549873
bone	38	SLC13A2	3.02666	-1.48037
bone	38	SLC13A3	3.11671	-0.569827
bone	38	SLC13A4	3.18706	-0.07154
bone	38	SLC13A5	2.9335	0.273565
bone	38	SLC14A1	3.51009	0.393038
bone	38	SLC14A2	3.04267	-0.0256088
bone	38	SLC15A1	3.15153	-0.330708
bone	38	SLC15A2	3.2495	-0.126517
bone	38	SLC15A3	3.95987	-1.72285
bone	38	SLC15A4	7.53693	-0.740233
bone	38	SLC16A1	8.70997	0.975523
bone	38	SLC16A10	4.04051	0.554581
bone	38	SLC16A11	3.64927	3.24162
bone	38	SLC16A12	2.76309	-0.49458
bone	38	SLC16A13	3.56558	0.244878
bone	38	SLC16A14	3.75198	-0.424418
bone	38	SLC16A2	3.76941	1.16019
bone	38	SLC16A3	5.15785	-0.710048
bone	38	SLC16A4	4.36327	-0.144754
bone	38	SLC16A5	3.43497	-0.912698
bone	38	SLC16A6	3.381	-0.459032
bone	38	SLC16A7	3.63684	-0.36137
bone	38	SLC16A8	3.24465	0.133099
bone	38	SLC16A9	3.55073	1.20972
bone	38	SLC17A1	3.0287	-0.501845
bone	38	SLC17A2	3.29273	-0.624418
bone	38	SLC17A3	3.2108	-0.372856
bone	38	SLC17A4	3.20194	-0.692482
bone	38	SLC17A5	5.90965	-0.511731
bone	38	SLC17A6	2.96038	-0.636539
bone	38	SLC17A7	3.41112	2.43286
bone	38	SLC17A8	3.70081	3.18173
bone	38	SLC17A9	3.15075	-0.677823
bone	38	SLC18A1	3.26456	-0.977594
bone	38	SLC18A2	3.29189	0.0114826
bone	38	SLC18B1	4.70664	0.0421914
bone	38	SLC19A1	3.81871	0.626352
bone	38	SLC19A2	4.98193	-0.142429
bone	38	SLC19A3	3.39071	1.48471
bone	38	SLC1A1	5.06227	1.39504
bone	38	SLC1A2	3.13487	-0.286927
bone	38	SLC1A3	3.46138	-0.0564427
bone	38	SLC1A4	5.4249	0.904092
bone	38	SLC1A5	7.18018	-0.156074
bone	38	SLC1A6	3.21313	0.907832
bone	38	SLC1A7	3.15116	-1.04506
bone	38	SLC20A1	9.56957	-0.196021
bone	38	SLC20A2	5.20934	0.0716219
bone	38	SLC22A1	3.17317	-0.222303
bone	38	SLC22A10	3.1601	-0.00487354
bone	38	SLC22A11	3.10452	-1.12872
bone	38	SLC22A12	2.99825	0.235203
bone	38	SLC22A13	3.44588	-0.508475
bone	38	SLC22A14	2.95436	0.624267
bone	38	SLC22A15	3.29517	-0.028656
bone	38	SLC22A16	3.2484	-0.00525047
bone	38	SLC22A17	4.36689	1.56675
bone	38	SLC22A18	5.42408	-1.42286
bone	38	SLC22A2	3.22815	-0.684409
bone	38	SLC22A20	3.12867	-0.548337
bone	38	SLC22A23	3.77497	-0.00772756
bone	38	SLC22A24	3.25756	-0.325351
bone	38	SLC22A25	3.09807	0.129519
bone	38	SLC22A3	2.74728	-1.02749
bone	38	SLC22A4	4.39632	-0.821777
bone	38	SLC22A5	4.01576	-0.878242
bone	38	SLC22A6	2.88777	-1.03094
bone	38	SLC22A7	3.14319	-1.18159
bone	38	SLC22A8	3.16943	0.0531284
bone	38	SLC22A9	2.9551	-0.452168
bone	38	SLC23A1	2.88841	-0.747199
bone	38	SLC23A2	3.80992	0.557355
bone	38	SLC23A3	3.42078	-0.880202
bone	38	SLC24A1	3.77543	-1.36432
bone	38	SLC24A2	3.4222	0.267097
bone	38	SLC24A3	6.01255	2.33083
bone	38	SLC24A4	3.21797	-0.0732945
bone	38	SLC24A5	3.92717	0.0408808
bone	38	SLC25A1	6.29678	-0.455591
bone	38	SLC25A10	5.52318	-0.77728
bone	38	SLC25A11	6.6131	0.606077
bone	38	SLC25A12	5.18715	-0.408503
bone	38	SLC25A13	5.76589	-1.58812
bone	38	SLC25A14	4.73616	1.68454
bone	38	SLC25A15	5.26847	-0.0285109
bone	38	SLC25A16	5.53193	-0.985854
bone	38	SLC25A17	6.2577	0.236942
bone	38	SLC25A18	3.23921	-0.332961
bone	38	SLC25A19	6.28488	-0.230716
bone	38	SLC25A2	2.89355	-0.346009
bone	38	SLC25A20	5.49727	0.317868
bone	38	SLC25A21	3.73009	1.75851
bone	38	SLC25A22	4.40376	-1.3762
bone	38	SLC25A23	3.77916	-0.598692
bone	38	SLC25A24	5.99552	-0.461798
bone	38	SLC25A25	3.78864	0.467471
bone	38	SLC25A26	6.00395	-0.991695
bone	38	SLC25A27	3.32756	-1.2382
bone	38	SLC25A28	6.28932	-1.10812
bone	38	SLC25A29	4.94533	0.279806
bone	38	SLC25A3	11.7299	0.17313
bone	38	SLC25A30	3.20915	0.834747
bone	38	SLC25A31	2.82393	-1.47283
bone	38	SLC25A32	6.72244	0.304456
bone	38	SLC25A34	3.69951	0.745589
bone	38	SLC25A35	3.32416	-1.97981
bone	38	SLC25A36	8.15588	-1.26726
bone	38	SLC25A37	7.17162	-0.107158
bone	38	SLC25A38	7.59827	0.269916
bone	38	SLC25A39	8.41351	-2.03288
bone	38	SLC25A4	5.54386	-0.214028
bone	38	SLC25A40	6.7016	-0.789099
bone	38	SLC25A41	3.19245	0.891571
bone	38	SLC25A42	3.52411	0.606043
bone	38	SLC25A43	3.91428	-2.1009
bone	38	SLC25A44	3.53025	-0.0686329
bone	38	SLC25A45	3.33413	-1.03648
bone	38	SLC25A46	7.16186	-0.677751
bone	38	SLC25A47	3.29386	-1.1134
bone	38	SLC25A48	3.00961	-0.98564
bone	38	SLC25A5	11.4398	-2.21226
bone	38	SLC25A53	3.39338	-0.343114
bone	38	SLC25A6	10.8089	1.60985
bone	38	SLC26A1	2.92972	-0.77649
bone	38	SLC26A10	4.83603	2.23592
bone	38	SLC26A11	5.13308	0.164745
bone	38	SLC26A2	7.33753	0.965184
bone	38	SLC26A3	2.8227	-0.370561
bone	38	SLC26A4	2.98364	-0.146242
bone	38	SLC26A5	3.0232	-0.770576
bone	38	SLC26A6	5.25258	-0.121316
bone	38	SLC26A7	2.82369	-0.561981
bone	38	SLC26A8	3.02469	0.453148
bone	38	SLC26A9	3.07979	-0.329732
bone	38	SLC27A1	3.22728	-0.423214
bone	38	SLC27A2	3.78491	-0.80534
bone	38	SLC27A3	3.39497	-0.62003
bone	38	SLC27A4	6.31872	0.511195
bone	38	SLC27A5	5.85537	-0.181271
bone	38	SLC27A6	3.01117	-0.147981
bone	38	SLC28A1	3.02667	-0.625907
bone	38	SLC28A2	3.07878	-0.442726
bone	38	SLC28A3	3.04759	-1.07378
bone	38	SLC29A1	3.45505	-0.18427
bone	38	SLC29A2	3.46932	0.006148
bone	38	SLC29A3	3.92816	-0.441596
bone	38	SLC29A4	3.52095	1.15516
bone	38	SLC2A1	6.11502	-1.24973
bone	38	SLC2A10	3.73933	-0.247613
bone	38	SLC2A12	4.05647	-0.941942
bone	38	SLC2A13	3.66436	1.49369
bone	38	SLC2A14	3.17237	-0.627433
bone	38	SLC2A2	3.05024	-0.588351
bone	38	SLC2A4	3.06165	-0.0355237
bone	38	SLC2A5	3.12643	-0.2175
bone	38	SLC2A6	4.68198	-1.93687
bone	38	SLC2A7	3.02901	-1.07915
bone	38	SLC2A8	5.08119	-0.714623
bone	38	SLC2A9	2.96052	-0.948839
bone	38	SLC30A1	5.22856	-1.87374
bone	38	SLC30A10	3.066	-1.6999
bone	38	SLC30A2	3.09985	-0.17171
bone	38	SLC30A3	4.35479	3.04986
bone	38	SLC30A4	3.06437	0.352022
bone	38	SLC30A5	6.19284	1.1526
bone	38	SLC30A6	4.16262	-1.28133
bone	38	SLC30A7	6.49909	0.238769
bone	38	SLC30A8	2.96452	-1.42115
bone	38	SLC30A9	7.48476	0.607628
bone	38	SLC31A1	7.17968	0.28477
bone	38	SLC31A2	4.20048	-0.791431
bone	38	SLC32A1	3.11709	-0.413695
bone	38	SLC33A1	6.66076	-1.85035
bone	38	SLC34A1	3.48683	-0.578641
bone	38	SLC34A2	3.22243	0.377235
bone	38	SLC34A3	3.77507	-1.35229
bone	38	SLC35A1	7.18043	-0.382269
bone	38	SLC35A2	4.77339	-1.05572
bone	38	SLC35A3	4.71619	-0.415668
bone	38	SLC35A4	4.63874	-0.229425
bone	38	SLC35A5	6.44077	-0.315382
bone	38	SLC35B1	9.1122	0.562592
bone	38	SLC35B2	6.1405	-0.869107
bone	38	SLC35B3	6.01064	1.8627
bone	38	SLC35B4	6.14755	0.742757
bone	38	SLC35C1	4.1526	-0.477406
bone	38	SLC35C2	5.9419	-1.49825
bone	38	SLC35D1	4.20957	0.325813
bone	38	SLC35D2	5.21208	-1.38263
bone	38	SLC35D3	2.91382	-0.750219
bone	38	SLC35E2	4.96473	1.69508
bone	38	SLC35E3	6.96601	-0.183539
bone	38	SLC35F1	4.05026	1.45154
bone	38	SLC35F2	4.76617	-0.961187
bone	38	SLC35F3	4.69834	1.80707
bone	38	SLC35F4	3.11547	0.383584
bone	38	SLC35F5	5.98823	-1.19863
bone	38	SLC35G1	4.30084	-0.377847
bone	38	SLC35G2	7.25428	0.797409
bone	38	SLC35G3	3.18742	0.243883
bone	38	SLC35G5	3.65741	0.55115
bone	38	SLC35G6	3.15927	-1.78577
bone	38	SLC36A1	3.46892	-0.299984
bone	38	SLC36A2	3.04801	1.6461
bone	38	SLC36A3	3.13176	-1.26339
bone	38	SLC36A4	6.10047	0.28835
bone	38	SLC37A1	3.79014	-0.773578
bone	38	SLC37A2	2.89765	-0.976842
bone	38	SLC37A3	4.03423	-0.676633
bone	38	SLC37A4	5.58819	-1.19354
bone	38	SLC38A1	9.66317	-0.355475
bone	38	SLC38A10	5.04165	-0.862354
bone	38	SLC38A11	3.1536	-0.77199
bone	38	SLC38A2	6.57528	0.53006
bone	38	SLC38A3	3.14026	-0.0639155
bone	38	SLC38A4	3.309	1.16001
bone	38	SLC38A5	4.07549	0.401198
bone	38	SLC38A6	5.44725	-0.256824
bone	38	SLC38A7	3.86531	-0.379906
bone	38	SLC38A8	3.15395	-1.44736
bone	38	SLC38A9	6.54141	0.136984
bone	38	SLC39A1	6.38349	0.12245
bone	38	SLC39A10	4.8199	-0.395861
bone	38	SLC39A11	4.81574	-1.20479
bone	38	SLC39A12	2.94002	0.330899
bone	38	SLC39A13	6.17173	0.0328616
bone	38	SLC39A14	3.39487	-0.467873
bone	38	SLC39A2	3.00986	-0.782251
bone	38	SLC39A3	3.69529	-0.754197
bone	38	SLC39A4	6.19949	-0.278215
bone	38	SLC39A5	3.8596	-0.652261
bone	38	SLC39A6	8.66723	0.193311
bone	38	SLC39A7	7.24855	0.32962
bone	38	SLC39A8	3.24476	-0.469337
bone	38	SLC39A9	3.91271	-0.394717
bone	38	SLC3A1	3.05775	-0.621894
bone	38	SLC3A2	8.38859	-0.143576
bone	38	SLC40A1	3.5969	-0.264162
bone	38	SLC41A1	7.25895	1.11107
bone	38	SLC41A2	3.48061	-0.932206
bone	38	SLC41A3	7.05776	0.92467
bone	38	SLC43A1	5.5726	0.828014
bone	38	SLC43A2	3.24447	-1.22583
bone	38	SLC44A1	8.80892	-1.39785
bone	38	SLC44A2	5.3369	-0.529759
bone	38	SLC44A3	3.77939	-1.18407
bone	38	SLC44A4	3.19603	-0.665542
bone	38	SLC44A5	3.31406	-0.5415
bone	38	SLC45A1	3.46543	0.351731
bone	38	SLC45A2	3.15494	-0.3212
bone	38	SLC45A3	3.34267	-0.956681
bone	38	SLC45A4	4.24379	-0.597122
bone	38	SLC46A1	3.62516	-1.08874
bone	38	SLC46A2	2.95431	-0.333455
bone	38	SLC46A3	4.15472	-0.637782
bone	38	SLC47A1	3.34281	0.679864
bone	38	SLC47A2	3.50455	-0.00927962
bone	38	SLC48A1	3.72187	-0.525844
bone	38	SLC4A1	3.08326	-1.63165
bone	38	SLC4A10	2.96445	-0.532864
bone	38	SLC4A11	3.71544	-1.14311
bone	38	SLC4A2	5.17371	-0.167458
bone	38	SLC4A3	3.7195	0.178155
bone	38	SLC4A4	2.91019	-0.314247
bone	38	SLC4A7	7.89765	0.604743
bone	38	SLC4A8	3.36842	0.60812
bone	38	SLC4A9	3.06728	-0.405898
bone	38	SLC50A1	6.14612	-1.07895
bone	38	SLC51A	3.26338	-0.191425
bone	38	SLC51B	3.26088	-0.440161
bone	38	SLC52A1	3.33036	-0.444135
bone	38	SLC52A2	5.75631	-0.720633
bone	38	SLC52A3	3.37597	-0.900987
bone	38	SLC5A1	2.95627	-0.628464
bone	38	SLC5A10	3.42851	-1.61858
bone	38	SLC5A11	3.48982	1.14886
bone	38	SLC5A12	2.93113	-0.359002
bone	38	SLC5A2	2.99671	1.05219
bone	38	SLC5A4	3.22334	-0.221374
bone	38	SLC5A5	3.0731	-1.52187
bone	38	SLC5A6	5.50038	1.03828
bone	38	SLC5A7	2.79965	-0.689991
bone	38	SLC5A8	2.95385	-0.288169
bone	38	SLC5A9	3.25339	-1.01931
bone	38	SLC6A1	3.0584	0.455963
bone	38	SLC6A11	3.01073	-0.826344
bone	38	SLC6A12	3.15028	-1.28565
bone	38	SLC6A13	3.12916	-0.73087
bone	38	SLC6A14	3.14388	-0.673685
bone	38	SLC6A15	4.98465	0.876948
bone	38	SLC6A16	3.11986	0.658386
bone	38	SLC6A17	3.42915	-0.635272
bone	38	SLC6A18	3.71212	0.0526204
bone	38	SLC6A19	3.14151	-0.52677
bone	38	SLC6A2	3.22092	-0.163657
bone	38	SLC6A20	3.16198	-0.544124
bone	38	SLC6A3	3.00736	-0.670119
bone	38	SLC6A4	3.06684	-0.431895
bone	38	SLC6A5	3.36141	-1.16044
bone	38	SLC6A6	3.68274	-1.05588
bone	38	SLC6A7	3.17561	-0.1555
bone	38	SLC6A8	7.13437	0.625209
bone	38	SLC6A9	3.34539	1.39322
bone	38	SLC7A1	5.37884	-0.649079
bone	38	SLC7A10	3.69721	2.82655
bone	38	SLC7A11	6.92317	1.14128
bone	38	SLC7A13	2.87102	-0.439745
bone	38	SLC7A14	3.10745	0.0314777
bone	38	SLC7A2	4.52312	0.273176
bone	38	SLC7A3	4.03595	2.22397
bone	38	SLC7A4	2.96684	-1.05626
bone	38	SLC7A5	5.49795	-0.573618
bone	38	SLC7A6	4.90244	-0.715432
bone	38	SLC7A7	3.56066	-0.757736
bone	38	SLC7A8	3.2774	1.52796
bone	38	SLC7A9	3.03492	-0.495638
bone	38	SLC8A1	3.37428	-0.189308
bone	38	SLC8A2	3.37865	0.260142
bone	38	SLC8A3	3.57747	1.47449
bone	38	SLC9A1	3.35937	-0.690839
bone	38	SLC9A2	2.93427	-0.84025
bone	38	SLC9A3	3.19174	-0.796436
bone	38	SLC9A5	3.59387	0.121729
bone	38	SLC9A6	5.94308	1.53009
bone	38	SLC9A7	3.29155	-1.09562
bone	38	SLC9A8	4.04073	-0.511161
bone	38	SLC9A9	3.30304	0.604575
bone	38	SLC9B1	3.26869	-0.53015
bone	38	SLC9B2	4.49048	1.20918
bone	38	SLC9C1	3.08916	-0.850452
bone	38	SLC9C2	3.04594	0.601962
bone	38	SLCO1A2	2.93524	-1.29521
bone	38	SLCO1B1	2.83525	-0.765114
bone	38	SLCO1C1	3.01455	2.25151
bone	38	SLCO2A1	3.29441	-1.60303
bone	38	SLCO2B1	3.12718	-0.597221
bone	38	SLCO3A1	3.95152	-0.668842
bone	38	SLCO4A1	4.53828	-1.18708
bone	38	SLCO4C1	2.95081	-0.314491
bone	38	SLCO5A1	4.34216	3.02151
bone	38	SLCO6A1	2.94763	-1.48581
bone	38	TAP1	6.57176	-1.6424
bone	38	UCP1	2.95231	-0.400591
bone	38	UCP2	5.13236	-0.148585
bone	38	UCP3	3.24631	-0.556919
breast	51	ABCA1	3.78341	-1.44993
breast	51	ABCA10	2.86995	-0.586189
breast	51	ABCA12	4.69042	2.51402
breast	51	ABCA13	3.06836	-0.638533
breast	51	ABCA2	3.05627	0.174871
breast	51	ABCA3	4.83087	1.34122
breast	51	ABCA4	3.3171	2.50877
breast	51	ABCA5	3.47778	-0.188339
breast	51	ABCA6	2.87298	-0.919178
breast	51	ABCA7	3.70105	0.0404948
breast	51	ABCA8	2.9512	-0.757204
breast	51	ABCA9	2.98349	-0.951714
breast	51	ABCB1	3.15991	-0.792047
breast	51	ABCB10	7.45926	0.219055
breast	51	ABCB11	3.0065	0.68824
breast	51	ABCB4	3.13636	-0.484214
breast	51	ABCB5	2.96871	-0.243398
breast	51	ABCB7	8.63324	-0.531237
breast	51	ABCB8	3.64326	0.841942
breast	51	ABCB9	3.4516	1.05119
breast	51	ABCC1	5.8019	-1.48109
breast	51	ABCC10	5.22692	0.839504
breast	51	ABCC11	3.78758	3.26596
breast	51	ABCC12	2.81715	-0.248455
breast	51	ABCC13	2.9005	1.96504
breast	51	ABCC2	4.07862	0.182381
breast	51	ABCC3	4.6439	0.0111742
breast	51	ABCC4	3.80918	-1.68393
breast	51	ABCC5	6.45402	2.07875
breast	51	ABCC6	3.27641	1.16388
breast	51	ABCC8	3.28796	0.988425
breast	51	ABCC9	2.94296	-0.579348
breast	51	ABCD1	3.66424	1.29991
breast	51	ABCD2	2.73736	-0.525474
breast	51	ABCD3	6.54002	1.82656
breast	51	ABCD4	3.97712	-1.40096
breast	51	ABCE1	7.10991	0.131013
breast	51	ABCF1	8.55744	1.15769
breast	51	ABCF2	5.92139	-0.753638
breast	51	ABCG1	4.97523	1.39617
breast	51	ABCG2	3.34919	-0.381126
breast	51	ABCG4	2.89053	-0.598593
breast	51	ABCG5	2.98753	-0.400584
breast	51	ABCG8	3.07858	-1.07501
breast	51	CFTR	3.09977	-0.570793
breast	51	DIRC2	4.32508	-0.172602
breast	51	FLVCR1	5.39394	0.771378
breast	51	MFSD7	3.48881	1.9379
breast	51	MTCH1	8.00084	0.700833
breast	51	MTCH2	8.37129	1.83301
breast	51	RHAG	3.13673	-0.31979
breast	51	RHBG	3.14375	2.40624
breast	51	RHCG	3.17074	-0.474938
breast	51	SLC10A1	2.96539	0.760249
breast	51	SLC10A2	3.01721	-0.479441
breast	51	SLC10A3	5.55262	0.898052
breast	51	SLC10A4	3.15291	-0.381324
breast	51	SLC10A5	3.07787	0.908029
breast	51	SLC10A6	3.2066	-0.132592
breast	51	SLC10A7	3.19457	0.256935
breast	51	SLC11A1	3.29494	0.102102
breast	51	SLC11A2	5.99162	2.17512
breast	51	SLC12A1	3.03767	2.90092
breast	51	SLC12A2	5.6086	0.512498
breast	51	SLC12A3	2.92956	0.262042
breast	51	SLC12A4	3.80737	-1.05517
breast	51	SLC12A5	3.14916	0.128242
breast	51	SLC12A6	3.38375	-0.770953
breast	51	SLC12A7	5.57855	0.502363
breast	51	SLC12A8	4.33904	0.418966
breast	51	SLC12A9	4.65501	1.20906
breast	51	SLC13A1	2.99884	-0.415058
breast	51	SLC13A2	3.08948	0.547714
breast	51	SLC13A3	3.16065	-0.00512859
breast	51	SLC13A4	3.16031	-0.573286
breast	51	SLC13A5	2.94474	0.700886
breast	51	SLC14A1	3.05419	-0.770911
breast	51	SLC14A2	3.04642	0.0430401
breast	51	SLC15A1	3.15601	-0.270375
breast	51	SLC15A2	3.40058	0.46556
breast	51	SLC15A3	4.20718	-0.769471
breast	51	SLC15A4	7.3901	-1.07776
breast	51	SLC16A1	6.53548	-2.84337
breast	51	SLC16A10	3.86133	-0.168346
breast	51	SLC16A11	3.13426	-0.127688
breast	51	SLC16A12	2.81964	-0.369484
breast	51	SLC16A13	3.60217	0.880885
breast	51	SLC16A14	5.67255	2.49247
breast	51	SLC16A2	3.57312	0.580895
breast	51	SLC16A3	5.12203	-0.755093
breast	51	SLC16A4	3.78399	-0.685214
breast	51	SLC16A5	3.66143	0.114127
breast	51	SLC16A6	4.08082	0.329189
breast	51	SLC16A7	3.42324	-1.32861
breast	51	SLC16A8	3.21157	-0.625618
breast	51	SLC16A9	3.34254	-0.256075
breast	51	SLC17A1	3.05191	-0.39912
breast	51	SLC17A2	3.33427	0.353659
breast	51	SLC17A3	3.21623	-0.354905
breast	51	SLC17A4	3.20634	-0.61147
breast	51	SLC17A5	5.83952	-0.74821
breast	51	SLC17A6	2.9693	-0.55715
breast	51	SLC17A7	3.1313	-0.640932
breast	51	SLC17A8	3.10799	-0.389017
breast	51	SLC17A9	3.20743	-0.490492
breast	51	SLC18A1	3.377	-0.350512
breast	51	SLC18A2	3.19349	-0.734252
breast	51	SLC18B1	4.62178	-0.215749
breast	51	SLC19A1	3.90224	1.20758
breast	51	SLC19A2	5.44812	0.80057
breast	51	SLC19A3	3.26092	0.598268
breast	51	SLC1A1	4.24033	-0.603539
breast	51	SLC1A2	3.41577	2.79016
breast	51	SLC1A3	3.4354	-0.171977
breast	51	SLC1A4	4.7295	-0.0873635
breast	51	SLC1A5	7.74416	2.26584
breast	51	SLC1A6	3.54862	2.66937
breast	51	SLC1A7	3.18383	-0.51574
breast	51	SLC20A1	8.91234	-1.86246
breast	51	SLC20A2	5.43215	0.554835
breast	51	SLC22A1	3.12779	-0.646856
breast	51	SLC22A10	3.14468	-0.509888
breast	51	SLC22A11	3.17139	0.179416
breast	51	SLC22A12	3.04112	1.30983
breast	51	SLC22A13	3.45369	-0.237934
breast	51	SLC22A14	2.9354	-0.0511854
breast	51	SLC22A15	3.21635	-0.68052
breast	51	SLC22A16	3.23604	-0.0712141
breast	51	SLC22A17	3.88803	-0.297707
breast	51	SLC22A18	6.7888	0.229514
breast	51	SLC22A2	3.25288	-0.312127
breast	51	SLC22A20	3.21377	0.7328
breast	51	SLC22A23	4.18377	1.587
breast	51	SLC22A24	3.27468	0.293426
breast	51	SLC22A25	3.05291	-1.44925
breast	51	SLC22A3	2.77248	-0.921744
breast	51	SLC22A4	4.47274	-0.643777
breast	51	SLC22A5	4.69969	2.09176
breast	51	SLC22A6	2.92029	0.262532
breast	51	SLC22A7	3.15902	-0.712053
breast	51	SLC22A8	3.19624	1.04482
breast	51	SLC22A9	2.98054	-0.0903767
breast	51	SLC23A1	2.98702	0.293028
breast	51	SLC23A2	3.52386	-0.611057
breast	51	SLC23A3	3.47618	-0.393136
breast	51	SLC24A1	3.99583	0.192617
breast	51	SLC24A2	3.3573	-1.36408
breast	51	SLC24A3	5.57773	1.91029
breast	51	SLC24A4	3.18192	-0.571931
breast	51	SLC24A5	3.53035	-0.301442
breast	51	SLC25A1	6.9657	2.20952
breast	51	SLC25A10	6.81088	1.95076
breast	51	SLC25A11	6.64432	0.732783
breast	51	SLC25A12	5.0863	-0.788903
breast	51	SLC25A13	6.63313	0.0649256
breast	51	SLC25A14	4.55426	0.0272215
breast	51	SLC25A15	5.50483	1.144
breast	51	SLC25A16	6.13617	1.37543
breast	51	SLC25A17	6.32678	0.573649
breast	51	SLC25A18	3.47819	1.50818
breast	51	SLC25A19	6.67836	0.484638
breast	51	SLC25A2	2.93531	0.852191
breast	51	SLC25A20	5.21785	-0.281933
breast	51	SLC25A21	3.3297	-0.157572
breast	51	SLC25A22	4.50056	-0.472296
breast	51	SLC25A23	3.9128	0.778128
breast	51	SLC25A24	6.26271	0.194278
breast	51	SLC25A25	3.7581	0.188792
breast	51	SLC25A26	6.05078	-0.762297
breast	51	SLC25A27	3.54763	-0.260541
breast	51	SLC25A28	6.66453	0.323365
breast	51	SLC25A29	5.57305	2.42489
breast	51	SLC25A3	11.5955	-1.13995
breast	51	SLC25A30	3.06057	-0.323014
breast	51	SLC25A31	2.87527	0.529622
breast	51	SLC25A32	6.4671	-0.58519
breast	51	SLC25A34	3.6525	-0.239747
breast	51	SLC25A35	3.55507	2.13686
breast	51	SLC25A36	8.63147	1.11739
breast	51	SLC25A37	6.49795	-1.57623
breast	51	SLC25A38	7.38677	-0.361322
breast	51	SLC25A39	9.25891	1.24294
breast	51	SLC25A4	5.83346	0.459989
breast	51	SLC25A40	6.94123	-0.0874786
breast	51	SLC25A41	3.11116	-0.889961
breast	51	SLC25A42	3.38209	-0.321767
breast	51	SLC25A43	4.95009	0.727735
breast	51	SLC25A44	3.63725	1.35565
breast	51	SLC25A45	3.51188	0.939744
breast	51	SLC25A46	7.13297	-0.783073
breast	51	SLC25A47	3.3443	-0.102056
breast	51	SLC25A48	3.07344	0.566917
breast	51	SLC25A5	11.9676	0.424876
breast	51	SLC25A53	3.32779	-1.11752
breast	51	SLC25A6	9.90371	-1.71322
breast	51	SLC26A1	2.98734	0.951092
breast	51	SLC26A10	3.30602	-0.613589
breast	51	SLC26A11	5.82085	1.43478
breast	51	SLC26A2	5.93511	-0.989389
breast	51	SLC26A3	3.04107	0.354358
breast	51	SLC26A4	2.88033	-0.606185
breast	51	SLC26A5	3.05337	0.420139
breast	51	SLC26A6	5.38903	0.350738
breast	51	SLC26A7	2.84032	0.2778
breast	51	SLC26A8	2.98421	-0.253264
breast	51	SLC26A9	3.09698	-0.0798007
breast	51	SLC27A1	3.28302	0.178335
breast	51	SLC27A2	5.53317	0.452544
breast	51	SLC27A3	3.8482	0.880455
breast	51	SLC27A4	6.48932	1.29378
breast	51	SLC27A5	6.97856	1.8082
breast	51	SLC27A6	3.20636	1.57709
breast	51	SLC28A1	3.09484	0.329905
breast	51	SLC28A2	3.0768	-0.46838
breast	51	SLC28A3	3.17649	0.0373642
breast	51	SLC29A1	3.58464	0.990129
breast	51	SLC29A2	3.80335	1.49666
breast	51	SLC29A3	4.23939	0.620046
breast	51	SLC29A4	3.39311	-0.722879
breast	51	SLC2A1	7.21161	0.1235
breast	51	SLC2A10	4.88383	2.2547
breast	51	SLC2A12	4.69255	0.129946
breast	51	SLC2A13	3.38622	-0.813154
breast	51	SLC2A14	3.39832	1.27824
breast	51	SLC2A2	3.08327	-0.405753
breast	51	SLC2A4	3.11163	1.6665
breast	51	SLC2A5	3.09465	-0.31929
breast	51	SLC2A6	5.13882	-0.203797
breast	51	SLC2A7	3.00224	-1.60373
breast	51	SLC2A8	5.76333	0.878278
breast	51	SLC2A9	3.10638	-0.601318
breast	51	SLC30A1	6.40623	0.558763
breast	51	SLC30A10	3.1124	-0.607384
breast	51	SLC30A2	3.14825	1.40597
breast	51	SLC30A3	3.743	0.197356
breast	51	SLC30A4	3.03908	-0.354349
breast	51	SLC30A5	6.00518	-0.540962
breast	51	SLC30A6	4.20201	-0.666152
breast	51	SLC30A7	6.19187	-2.04611
breast	51	SLC30A8	3.04773	0.26688
breast	51	SLC30A9	7.4744	0.543153
breast	51	SLC31A1	7.2267	0.420122
breast	51	SLC31A2	4.86185	0.740852
breast	51	SLC32A1	3.10878	-0.577505
breast	51	SLC33A1	7.02417	0.0982699
breast	51	SLC34A1	3.51084	0.399307
breast	51	SLC34A2	3.13399	0.0294527
breast	51	SLC34A3	3.92009	0.763613
breast	51	SLC35A1	7.79872	1.96783
breast	51	SLC35A2	5.25591	1.47354
breast	51	SLC35A3	5.21431	1.50513
breast	51	SLC35A4	4.86359	1.55998
breast	51	SLC35A5	6.07838	-1.87323
breast	51	SLC35B1	9.27897	1.61797
breast	51	SLC35B2	6.56421	0.295078
breast	51	SLC35B3	5.68827	-0.00219146
breast	51	SLC35B4	4.97773	-1.14526
breast	51	SLC35C1	4.16432	-0.400918
breast	51	SLC35C2	6.37227	0.592028
breast	51	SLC35D1	3.96462	-0.678589
breast	51	SLC35D2	6.28715	-0.260099
breast	51	SLC35D3	2.90978	-0.772204
breast	51	SLC35E2	4.53507	-0.176554
breast	51	SLC35E3	6.96143	-0.202305
breast	51	SLC35F1	3.20333	-0.603887
breast	51	SLC35F2	4.72645	-1.08743
breast	51	SLC35F3	3.37195	-0.504039
breast	51	SLC35F4	2.92103	-1.26701
breast	51	SLC35F5	6.55979	0.152796
breast	51	SLC35G1	4.01548	-1.36546
breast	51	SLC35G2	4.51384	-1.49741
breast	51	SLC35G3	3.1772	-0.0780259
breast	51	SLC35G5	3.55321	-0.719881
breast	51	SLC35G6	3.24848	0.358747
breast	51	SLC36A1	3.4957	0.413466
breast	51	SLC36A2	3.00416	0.0106493
breast	51	SLC36A3	3.15941	0.666179
breast	51	SLC36A4	5.73387	-0.50343
breast	51	SLC37A1	5.18746	1.36402
breast	51	SLC37A2	2.97515	-0.382861
breast	51	SLC37A3	4.1934	-0.0896627
breast	51	SLC37A4	6.2446	0.984787
breast	51	SLC38A1	10.6116	0.736598
breast	51	SLC38A10	5.11819	-0.481932
breast	51	SLC38A11	3.20157	-0.454322
breast	51	SLC38A2	5.90631	-0.968642
breast	51	SLC38A3	3.16976	0.437054
breast	51	SLC38A4	3.0312	-0.925064
breast	51	SLC38A5	3.1493	-1.18696
breast	51	SLC38A6	5.14286	-0.942501
breast	51	SLC38A7	3.85278	-0.56448
breast	51	SLC38A8	3.1861	-0.944316
breast	51	SLC38A9	6.01241	-1.69944
breast	51	SLC39A1	6.71775	1.14648
breast	51	SLC39A10	4.51089	-1.51879
breast	51	SLC39A11	5.98691	1.87937
breast	51	SLC39A12	2.8556	-0.844548
breast	51	SLC39A13	5.84015	-0.621038
breast	51	SLC39A14	3.2173	-2.05512
breast	51	SLC39A2	3.35449	1.41721
breast	51	SLC39A3	3.86015	0.209668
breast	51	SLC39A4	7.06061	1.01885
breast	51	SLC39A5	3.877	-0.571426
breast	51	SLC39A6	8.929	0.833089
breast	51	SLC39A7	7.5753	1.33383
breast	51	SLC39A8	3.24228	-0.485104
breast	51	SLC39A9	4.00668	0.211204
breast	51	SLC3A1	3.06582	-0.594279
breast	51	SLC3A2	8.70841	0.715044
breast	51	SLC40A1	4.92887	2.03927
breast	51	SLC41A1	6.82543	-0.747557
breast	51	SLC41A2	3.90929	-0.0417411
breast	51	SLC41A3	6.73335	-0.303793
breast	51	SLC43A1	4.65117	-0.401796
breast	51	SLC43A2	3.52105	2.03487
breast	51	SLC44A1	9.49084	0.34225
breast	51	SLC44A2	6.93905	2.29062
breast	51	SLC44A3	5.28643	0.46195
breast	51	SLC44A4	4.01182	0.758513
breast	51	SLC44A5	3.40989	-0.160308
breast	51	SLC45A1	3.38267	-0.26239
breast	51	SLC45A2	3.16445	-0.310819
breast	51	SLC45A3	3.49546	0.716258
breast	51	SLC45A4	4.9052	0.729733
breast	51	SLC46A1	3.9912	1.16598
breast	51	SLC46A2	2.97955	0.656246
breast	51	SLC46A3	5.13998	1.4164
breast	51	SLC47A1	3.20047	-1.3461
breast	51	SLC47A2	3.36299	-0.40052
breast	51	SLC48A1	3.93845	0.580335
breast	51	SLC4A1	3.13795	-0.0228211
breast	51	SLC4A10	2.96211	-0.597598
breast	51	SLC4A11	4.63418	1.39633
breast	51	SLC4A2	5.47218	0.531946
breast	51	SLC4A3	3.7183	0.170714
breast	51	SLC4A4	2.82543	-0.585036
breast	51	SLC4A7	7.36142	-0.74384
breast	51	SLC4A8	3.36662	0.597057
breast	51	SLC4A9	3.07049	-0.308682
breast	51	SLC50A1	7.30232	2.14585
breast	51	SLC51A	3.27882	0.188463
breast	51	SLC51B	3.31471	-0.159562
breast	51	SLC52A1	3.56138	0.264708
breast	51	SLC52A2	6.41326	1.8354
breast	51	SLC52A3	3.94794	1.63708
breast	51	SLC5A1	3.25388	0.536114
breast	51	SLC5A10	3.58178	0.890513
breast	51	SLC5A11	3.43327	0.512397
breast	51	SLC5A12	2.93073	-0.371819
breast	51	SLC5A2	2.9842	0.654266
breast	51	SLC5A4	3.20181	-0.272582
breast	51	SLC5A5	3.17351	0.970708
breast	51	SLC5A6	6.05191	2.26439
breast	51	SLC5A7	2.80128	-0.642713
breast	51	SLC5A8	3.44777	3.22546
breast	51	SLC5A9	3.29068	-0.456714
breast	51	SLC6A1	3.04958	-0.00616894
breast	51	SLC6A11	3.10804	2.11614
breast	51	SLC6A12	3.22175	0.129529
breast	51	SLC6A13	3.15459	-0.207227
breast	51	SLC6A14	3.85776	1.34571
breast	51	SLC6A15	3.69376	-0.572549
breast	51	SLC6A16	3.09492	0.410852
breast	51	SLC6A17	3.48968	0.544972
breast	51	SLC6A18	3.77417	1.09038
breast	51	SLC6A19	3.15557	-0.293028
breast	51	SLC6A2	3.29695	0.196611
breast	51	SLC6A20	3.22622	-0.342679
breast	51	SLC6A3	3.04269	0.0239141
breast	51	SLC6A4	3.1181	0.22545
breast	51	SLC6A5	3.40766	-0.118348
breast	51	SLC6A6	3.76476	-0.475932
breast	51	SLC6A7	3.15552	-0.737805
breast	51	SLC6A8	6.52594	-0.264505
breast	51	SLC6A9	3.36278	1.66403
breast	51	SLC7A1	5.52317	0.192054
breast	51	SLC7A10	3.37038	-0.0391289
breast	51	SLC7A11	6.02452	-1.29636
breast	51	SLC7A13	3.01588	2.74202
breast	51	SLC7A14	2.96488	-1.04231
breast	51	SLC7A2	4.23898	-0.336093
breast	51	SLC7A3	2.84904	-0.91194
breast	51	SLC7A4	3.0048	-0.177569
breast	51	SLC7A5	5.95706	0.406551
breast	51	SLC7A6	5.15218	0.276594
breast	51	SLC7A7	3.27244	-1.21066
breast	51	SLC7A8	3.15754	0.443021
breast	51	SLC7A9	3.10973	0.0574707
breast	51	SLC8A1	3.32849	-0.437788
breast	51	SLC8A2	3.41048	1.17227
breast	51	SLC8A3	2.9816	-0.758021
breast	51	SLC9A1	3.50309	0.999372
breast	51	SLC9A2	3.71515	1.80362
breast	51	SLC9A3	3.28196	0.662794
breast	51	SLC9A5	3.58869	0.0836589
breast	51	SLC9A6	5.2723	-2.3401
breast	51	SLC9A7	3.76191	0.852947
breast	51	SLC9A8	4.20254	0.851527
breast	51	SLC9A9	3.05268	-1.03587
breast	51	SLC9B1	3.29241	-0.149896
breast	51	SLC9B2	3.73749	-0.972717
breast	51	SLC9C1	3.11386	-0.461732
breast	51	SLC9C2	3.03684	0.347114
breast	51	SLCO1A2	2.96429	-0.883677
breast	51	SLCO1B1	2.81666	-0.962523
breast	51	SLCO1C1	2.94078	-0.182664
breast	51	SLCO2A1	3.4546	0.446204
breast	51	SLCO2B1	3.15428	-0.443127
breast	51	SLCO3A1	3.96699	-0.636691
breast	51	SLCO4A1	4.72675	-0.753833
breast	51	SLCO4C1	2.93263	-0.407013
breast	51	SLCO5A1	3.33056	-0.545866
breast	51	SLCO6A1	2.94235	-1.59354
breast	51	TAP1	7.34546	-0.24072
breast	51	UCP1	2.97774	0.359853
breast	51	UCP2	5.97419	1.46015
breast	51	UCP3	3.29472	0.330292
digestive system	101	ABCA1	4.09435	-0.749722
digestive system	101	ABCA10	2.9589	-0.102149
digestive system	101	ABCA12	3.45769	-0.0742875
digestive system	101	ABCA13	3.14874	-0.275973
digestive system	101	ABCA2	3.09122	1.35892
digestive system	101	ABCA3	4.31902	-0.00342342
digestive system	101	ABCA4	3.12714	-0.211913
digestive system	101	ABCA5	3.38516	-0.485698
digestive system	101	ABCA6	3.14742	0.258412
digestive system	101	ABCA7	3.8526	0.972609
digestive system	101	ABCA8	2.9974	-0.282405
digestive system	101	ABCA9	3.0144	0.0365057
digestive system	101	ABCB1	4.81315	1.36136
digestive system	101	ABCB10	7.5134	0.380438
digestive system	101	ABCB11	2.98883	0.123996
digestive system	101	ABCB4	3.30963	-0.031065
digestive system	101	ABCB5	2.98538	-0.130717
digestive system	101	ABCB7	8.93378	0.714557
digestive system	101	ABCB8	3.62893	0.554924
digestive system	101	ABCB9	3.42215	0.235555
digestive system	101	ABCC1	6.12834	-0.272252
digestive system	101	ABCC10	5.12869	0.380684
digestive system	101	ABCC11	3.12066	-0.173274
digestive system	101	ABCC12	2.83493	0.356347
digestive system	101	ABCC13	2.85774	0.68838
digestive system	101	ABCC2	4.49526	1.02894
digestive system	101	ABCC3	5.63682	1.05679
digestive system	101	ABCC4	4.50257	-0.120568
digestive system	101	ABCC5	5.51165	-0.559424
digestive system	101	ABCC6	3.43113	2.56571
digestive system	101	ABCC8	3.22026	0.100065
digestive system	101	ABCC9	2.97549	-0.445417
digestive system	101	ABCD1	3.50418	-0.152088
digestive system	101	ABCD2	2.76837	-0.157713
digestive system	101	ABCD3	6.37897	1.01794
digestive system	101	ABCD4	4.14643	0.37191
digestive system	101	ABCE1	7.15868	0.381936
digestive system	101	ABCF1	8.27657	-0.433426
digestive system	101	ABCF2	5.97547	-0.481221
digestive system	101	ABCG1	4.16917	-0.0560516
digestive system	101	ABCG2	3.5644	0.644562
digestive system	101	ABCG4	2.92534	0.426773
digestive system	101	ABCG5	3.25351	1.05456
digestive system	101	ABCG8	3.14061	0.437772
digestive system	101	CFTR	4.63826	3.064
digestive system	101	DIRC2	4.547	0.402472
digestive system	101	FLVCR1	5.60625	1.40935
digestive system	101	MFSD7	3.34519	0.320849
digestive system	101	MTCH1	7.83841	-0.251971
digestive system	101	MTCH2	8.23674	1.05107
digestive system	101	RHAG	3.15625	-0.197703
digestive system	101	RHBG	3.10086	1.42253
digestive system	101	RHCG	3.24466	0.143224
digestive system	101	SLC10A1	2.93281	-0.0154313
digestive system	101	SLC10A2	3.05409	0.55009
digestive system	101	SLC10A3	5.41174	0.476749
digestive system	101	SLC10A4	3.1644	-0.36158
digestive system	101	SLC10A5	3.0568	0.409955
digestive system	101	SLC10A6	3.20809	-0.0988479
digestive system	101	SLC10A7	3.20201	0.350863
digestive system	101	SLC11A1	3.31842	0.657379
digestive system	101	SLC11A2	5.84323	0.965689
digestive system	101	SLC12A1	2.8997	-0.126465
digestive system	101	SLC12A2	6.78634	2.3568
digestive system	101	SLC12A3	2.93589	0.421115
digestive system	101	SLC12A4	3.84854	-0.643768
digestive system	101	SLC12A5	3.1315	-0.467022
digestive system	101	SLC12A6	3.42768	-0.508358
digestive system	101	SLC12A7	6.11655	1.78858
digestive system	101	SLC12A8	4.32488	0.37896
digestive system	101	SLC12A9	4.7529	1.921
digestive system	101	SLC13A1	3.03428	1.02995
digestive system	101	SLC13A2	3.11403	1.34043
digestive system	101	SLC13A3	3.13417	-0.345387
digestive system	101	SLC13A4	3.16296	-0.523453
digestive system	101	SLC13A5	2.9808	2.07193
digestive system	101	SLC14A1	3.12856	-0.581052
digestive system	101	SLC14A2	3.02694	-0.314098
digestive system	101	SLC15A1	3.2602	1.13457
digestive system	101	SLC15A2	3.29855	0.0657187
digestive system	101	SLC15A3	4.28056	-0.486579
digestive system	101	SLC15A4	7.62915	-0.528262
digestive system	101	SLC16A1	8.29523	0.247143
digestive system	101	SLC16A10	4.04521	0.573566
digestive system	101	SLC16A11	3.12635	-0.179401
digestive system	101	SLC16A12	2.967	-0.0434675
digestive system	101	SLC16A13	3.61091	1.03291
digestive system	101	SLC16A14	3.94264	-0.134847
digestive system	101	SLC16A2	3.05826	-0.938559
digestive system	101	SLC16A3	5.53097	-0.240867
digestive system	101	SLC16A4	4.41849	-0.09323
digestive system	101	SLC16A5	3.88341	1.12067
digestive system	101	SLC16A6	3.58598	-0.22816
digestive system	101	SLC16A7	3.58384	-0.601399
digestive system	101	SLC16A8	3.27106	0.739108
digestive system	101	SLC16A9	3.48162	0.723188
digestive system	101	SLC17A1	3.13247	-0.0426279
digestive system	101	SLC17A2	3.37878	1.40196
digestive system	101	SLC17A3	3.29627	-0.0905319
digestive system	101	SLC17A4	3.33602	1.77139
digestive system	101	SLC17A5	6.50889	1.50899
digestive system	101	SLC17A6	2.99051	-0.368268
digestive system	101	SLC17A7	3.16185	-0.305336
digestive system	101	SLC17A8	3.14466	-0.168154
digestive system	101	SLC17A9	3.66908	1.03506
digestive system	101	SLC18A1	3.4156	-0.135221
digestive system	101	SLC18A2	3.23675	-0.406444
digestive system	101	SLC18B1	5.1062	1.25667
digestive system	101	SLC19A1	3.78181	0.369537
digestive system	101	SLC19A2	5.36527	0.632986
digestive system	101	SLC19A3	3.40828	1.60474
digestive system	101	SLC1A1	4.99372	1.22836
digestive system	101	SLC1A2	3.2519	0.995084
digestive system	101	SLC1A3	3.57114	0.431865
digestive system	101	SLC1A4	4.49472	-0.422095
digestive system	101	SLC1A5	7.56618	1.50151
digestive system	101	SLC1A6	2.92443	-0.607984
digestive system	101	SLC1A7	3.27172	0.908046
digestive system	101	SLC20A1	9.4166	-0.58388
digestive system	101	SLC20A2	5.61062	0.941897
digestive system	101	SLC22A1	3.2515	0.510423
digestive system	101	SLC22A10	3.19361	1.09245
digestive system	101	SLC22A11	3.23793	1.48107
digestive system	101	SLC22A12	3.01089	0.552035
digestive system	101	SLC22A13	3.48553	0.865023
digestive system	101	SLC22A14	2.96065	0.848201
digestive system	101	SLC22A15	3.28439	-0.117815
digestive system	101	SLC22A16	3.19588	-0.285499
digestive system	101	SLC22A17	3.64548	-1.24208
digestive system	101	SLC22A18	7.57072	1.17625
digestive system	101	SLC22A2	3.29026	0.250713
digestive system	101	SLC22A20	3.16734	0.033759
digestive system	101	SLC22A23	4.11992	1.33792
digestive system	101	SLC22A24	3.28201	0.558805
digestive system	101	SLC22A25	3.10221	0.27406
digestive system	101	SLC22A3	3.46787	1.9968
digestive system	101	SLC22A4	4.29214	-1.06444
digestive system	101	SLC22A5	4.40296	0.803232
digestive system	101	SLC22A6	2.93322	0.777055
digestive system	101	SLC22A7	3.23607	1.57388
digestive system	101	SLC22A8	3.18018	0.450652
digestive system	101	SLC22A9	3.19297	2.93144
digestive system	101	SLC23A1	3.0225	0.667312
digestive system	101	SLC23A2	3.55529	-0.482672
digestive system	101	SLC23A3	3.80557	2.50268
digestive system	101	SLC24A1	4.00922	0.287217
digestive system	101	SLC24A2	3.40542	-0.154753
digestive system	101	SLC24A3	3.01692	-0.566393
digestive system	101	SLC24A4	3.20705	-0.224448
digestive system	101	SLC24A5	3.29651	-0.503173
digestive system	101	SLC25A1	6.51845	0.427554
digestive system	101	SLC25A10	6.55461	1.40785
digestive system	101	SLC25A11	6.4236	-0.162908
digestive system	101	SLC25A12	5.08308	-0.801042
digestive system	101	SLC25A13	6.98121	0.728402
digestive system	101	SLC25A14	4.53512	-0.147221
digestive system	101	SLC25A15	5.47026	0.972494
digestive system	101	SLC25A16	5.80026	0.0627241
digestive system	101	SLC25A17	5.97725	-1.13002
digestive system	101	SLC25A18	3.48785	1.58261
digestive system	101	SLC25A19	6.74598	0.607576
digestive system	101	SLC25A2	2.9221	0.472945
digestive system	101	SLC25A20	5.50356	0.331363
digestive system	101	SLC25A21	3.27995	-0.395662
digestive system	101	SLC25A22	4.58095	0.27847
digestive system	101	SLC25A23	3.83774	0.00482988
digestive system	101	SLC25A24	6.30768	0.304701
digestive system	101	SLC25A25	3.93302	1.7853
digestive system	101	SLC25A26	6.43185	1.10427
digestive system	101	SLC25A27	3.801	0.865034
digestive system	101	SLC25A28	6.64137	0.234982
digestive system	101	SLC25A29	4.86838	0.0168647
digestive system	101	SLC25A3	11.7892	0.751473
digestive system	101	SLC25A30	3.05937	-0.332353
digestive system	101	SLC25A31	2.85913	-0.0997064
digestive system	101	SLC25A32	6.36763	-0.931747
digestive system	101	SLC25A34	3.66261	-0.0278549
digestive system	101	SLC25A35	3.43785	0.0471991
digestive system	101	SLC25A36	8.16926	-1.20017
digestive system	101	SLC25A37	6.61007	-1.33174
digestive system	101	SLC25A38	7.76198	0.7585
digestive system	101	SLC25A39	9.26437	1.26408
digestive system	101	SLC25A4	5.55615	-0.185439
digestive system	101	SLC25A40	7.023	0.151911
digestive system	101	SLC25A41	3.15321	0.0317036
digestive system	101	SLC25A42	3.43953	0.0534963
digestive system	101	SLC25A43	4.83972	0.426335
digestive system	101	SLC25A44	3.52204	-0.177941
digestive system	101	SLC25A45	3.49344	0.734732
digestive system	101	SLC25A46	7.09182	-0.933068
digestive system	101	SLC25A47	3.37961	0.606103
digestive system	101	SLC25A48	3.10974	1.45007
digestive system	101	SLC25A5	12.0416	0.794262
digestive system	101	SLC25A53	3.40855	-0.16409
digestive system	101	SLC25A6	10.449	0.288431
digestive system	101	SLC26A1	2.99091	1.05786
digestive system	101	SLC26A10	3.19818	-0.814424
digestive system	101	SLC26A11	4.79071	-0.467469
digestive system	101	SLC26A2	5.99	-0.912888
digestive system	101	SLC26A3	3.87781	3.13207
digestive system	101	SLC26A4	2.89937	-0.521446
digestive system	101	SLC26A5	3.06254	0.782229
digestive system	101	SLC26A6	5.73805	1.55817
digestive system	101	SLC26A7	2.84528	0.528585
digestive system	101	SLC26A8	3.02935	0.534512
digestive system	101	SLC26A9	3.12184	0.281658
digestive system	101	SLC27A1	3.21803	-0.523012
digestive system	101	SLC27A2	7.39361	1.79114
digestive system	101	SLC27A3	3.60286	0.0682425
digestive system	101	SLC27A4	6.51543	1.41352
digestive system	101	SLC27A5	6.24178	0.503165
digestive system	101	SLC27A6	2.98817	-0.351218
digestive system	101	SLC28A1	3.06254	-0.123037
digestive system	101	SLC28A2	3.3115	2.57894
digestive system	101	SLC28A3	3.23907	0.576856
digestive system	101	SLC29A1	3.51916	0.396692
digestive system	101	SLC29A2	3.8054	1.50582
digestive system	101	SLC29A3	4.40336	1.17935
digestive system	101	SLC29A4	3.46106	0.27529
digestive system	101	SLC2A1	7.50652	0.4928
digestive system	101	SLC2A10	3.73008	-0.267828
digestive system	101	SLC2A12	4.8599	0.411955
digestive system	101	SLC2A13	3.48586	0.0132073
digestive system	101	SLC2A14	3.48645	2.02153
digestive system	101	SLC2A2	3.30744	0.833634
digestive system	101	SLC2A4	3.07836	0.533547
digestive system	101	SLC2A5	3.11148	-0.265382
digestive system	101	SLC2A6	4.89052	-1.14574
digestive system	101	SLC2A7	3.07965	-0.0868566
digestive system	101	SLC2A8	6.09559	1.65416
digestive system	101	SLC2A9	3.32129	-0.0892961
digestive system	101	SLC30A1	6.77077	1.31172
digestive system	101	SLC30A10	3.22836	2.1231
digestive system	101	SLC30A2	3.12906	0.780181
digestive system	101	SLC30A3	3.64546	-0.257404
digestive system	101	SLC30A4	3.00613	-1.27473
digestive system	101	SLC30A5	6.03669	-0.25665
digestive system	101	SLC30A6	4.24885	0.0654225
digestive system	101	SLC30A7	6.31516	-1.12918
digestive system	101	SLC30A8	3.08213	0.964556
digestive system	101	SLC30A9	7.40825	0.131588
digestive system	101	SLC31A1	7.18471	0.299249
digestive system	101	SLC31A2	4.3004	-0.559921
digestive system	101	SLC32A1	3.16978	0.625628
digestive system	101	SLC33A1	7.06701	0.327959
digestive system	101	SLC34A1	3.5199	0.768574
digestive system	101	SLC34A2	3.00578	-0.474763
digestive system	101	SLC34A3	3.94593	1.14056
digestive system	101	SLC35A1	7.53857	0.979037
digestive system	101	SLC35A2	5.25261	1.45624
digestive system	101	SLC35A3	5.31268	1.88445
digestive system	101	SLC35A4	4.65812	-0.075181
digestive system	101	SLC35A5	6.44164	-0.31165
digestive system	101	SLC35B1	9.06367	0.255517
digestive system	101	SLC35B2	6.52789	0.195296
digestive system	101	SLC35B3	5.69601	0.0426125
digestive system	101	SLC35B4	5.2444	-0.71488
digestive system	101	SLC35C1	4.51214	1.86922
digestive system	101	SLC35C2	6.33338	0.403152
digestive system	101	SLC35D1	4.2899	0.655159
digestive system	101	SLC35D2	7.66885	1.1826
digestive system	101	SLC35D3	3.45379	2.18484
digestive system	101	SLC35E2	4.45613	-0.520405
digestive system	101	SLC35E3	6.79555	-0.881965
digestive system	101	SLC35F1	3.19936	-0.613516
digestive system	101	SLC35F2	5.26653	0.62924
digestive system	101	SLC35F3	3.07954	-1.01354
digestive system	101	SLC35F4	3.03375	-0.310163
digestive system	101	SLC35F5	6.66827	0.409272
digestive system	101	SLC35G1	4.91679	1.75386
digestive system	101	SLC35G2	4.94349	-1.13763
digestive system	101	SLC35G3	3.17907	-0.019078
digestive system	101	SLC35G5	3.60691	-0.0648651
digestive system	101	SLC35G6	3.31226	1.89198
digestive system	101	SLC36A1	3.50901	0.768008
digestive system	101	SLC36A2	2.99178	-0.451027
digestive system	101	SLC36A3	3.16642	1.15566
digestive system	101	SLC36A4	5.32304	-1.39073
digestive system	101	SLC37A1	4.88113	0.895403
digestive system	101	SLC37A2	2.99512	-0.229796
digestive system	101	SLC37A3	4.34685	0.476211
digestive system	101	SLC37A4	6.34835	1.32909
digestive system	101	SLC38A1	10.1335	0.186026
digestive system	101	SLC38A10	5.3937	0.88731
digestive system	101	SLC38A11	3.62753	2.36684
digestive system	101	SLC38A2	6.29368	-0.100823
digestive system	101	SLC38A3	3.29725	2.60216
digestive system	101	SLC38A4	3.25495	0.754329
digestive system	101	SLC38A5	4.14858	0.526517
digestive system	101	SLC38A6	5.17156	-0.877841
digestive system	101	SLC38A7	3.9134	0.328638
digestive system	101	SLC38A8	3.26179	0.239936
digestive system	101	SLC38A9	6.54483	0.148855
digestive system	101	SLC39A1	6.39704	0.163945
digestive system	101	SLC39A10	4.95001	0.0769636
digestive system	101	SLC39A11	5.33998	0.175743
digestive system	101	SLC39A12	2.88874	-0.383087
digestive system	101	SLC39A13	5.76586	-0.767548
digestive system	101	SLC39A14	3.56848	1.08383
digestive system	101	SLC39A2	3.13782	0.0343873
digestive system	101	SLC39A3	3.79902	-0.147699
digestive system	101	SLC39A4	6.87155	0.73408
digestive system	101	SLC39A5	4.69189	3.21315
digestive system	101	SLC39A6	8.13352	-1.11111
digestive system	101	SLC39A7	7.19391	0.161698
digestive system	101	SLC39A8	3.28131	-0.236771
digestive system	101	SLC39A9	4.00894	0.225773
digestive system	101	SLC3A1	3.52268	0.968245
digestive system	101	SLC3A2	8.68675	0.65687
digestive system	101	SLC40A1	4.75177	1.73301
digestive system	101	SLC41A1	6.51988	-2.05757
digestive system	101	SLC41A2	4.20953	0.581941
digestive system	101	SLC41A3	7.00857	0.738393
digestive system	101	SLC43A1	5.71048	1.01204
digestive system	101	SLC43A2	3.41991	0.842501
digestive system	101	SLC44A1	9.75289	1.01093
digestive system	101	SLC44A2	5.68377	0.080859
digestive system	101	SLC44A3	6.31521	1.5856
digestive system	101	SLC44A4	4.75895	2.06271
digestive system	101	SLC44A5	3.55782	0.428138
digestive system	101	SLC45A1	3.32539	-0.687414
digestive system	101	SLC45A2	3.28408	-0.180276
digestive system	101	SLC45A3	3.52732	1.06515
digestive system	101	SLC45A4	5.02841	0.976914
digestive system	101	SLC46A1	3.98293	1.11505
digestive system	101	SLC46A2	2.96431	0.0587577
digestive system	101	SLC46A3	4.60928	0.309936
digestive system	101	SLC47A1	3.37089	1.07957
digestive system	101	SLC47A2	3.39243	-0.319151
digestive system	101	SLC48A1	3.78046	-0.226585
digestive system	101	SLC4A1	3.12475	-0.411297
[truncated: 3,422 more rows]
